# Supplementary material for: Preclinical evidence for the therapeutic value of TBX5 normalization in arrhythmia control
Source: PubMed Central journal article supplement — Cardiovasc Res. 2020 Aug 10;117(8):1908–22. doi: 10.1093/cvr/cvaa239 (PMC8262635; doi:10.1093/cvr/cvaa239), 2020-08-10
Supplement: cvaa239_supplementary_data.pdf [file cvaa239_supplementary_data.pdf]

## Preclinical evidence for the therapeutic value of TBX5 normalization in arrhythmia control

**Authors:** Franziska S. Rathjens<sup>1,2</sup>, Alica Blenkle<sup>1</sup>, Lavanya M. Iyer<sup>1,2</sup>, Anke Renger<sup>3</sup>, Fahima Syeda<sup>4</sup>, Claudia Noack<sup>1,2</sup>, Andreas Jungmann<sup>5,6</sup>, Matthias Dewenter<sup>6,7</sup>, Karl Toischer<sup>8</sup>, Ali El-Armouche<sup>9</sup>, Oliver J. Müller<sup>10</sup>, Larissa Fabritz<sup>4,11,12</sup>, Wolfram-Hubertus Zimmermann<sup>1,2</sup>, Laura C. Zelarayan<sup>1,2,\*</sup> and Maria-Patapia Zafeiriou<sup>1,2,\*</sup>

### Affiliations:

<sup>1</sup> Institute of Pharmacology and Toxicology, University Medical Center, Goettingen, Germany

<sup>2</sup> DZHK (German Center for Cardiovascular Disease), partner site Goettingen, Germany

<sup>3</sup> Institut für Erziehungswissenschaften, Humboldt University, Berlin, Germany

<sup>4</sup> Institute of Cardiovascular Science, University of Birmingham, Birmingham, United Kingdom

<sup>5</sup> Internal Medicine III, University Hospital Heidelberg, Heidelberg, Germany

<sup>6</sup> DZHK (German Center for Cardiovascular Disease), partner site Heidelberg/Mannheim, Germany

<sup>7</sup> Department of Molecular Cardiology and Epigenetics, University of Heidelberg, Germany

<sup>8</sup> Department of Cardiology and Pneumology, University Medical Center, Goettingen, Germany

<sup>9</sup> Department of Pharmacology and Toxicology, Faculty of Medicine, University of Technology-Dresden, Germany

<sup>10</sup> Department of Internal Medicine III, University of Kiel, Kiel, Germany.

<sup>11</sup> Division of Rhythmology, Department of Cardiovascular Medicine, Hospital of the University of Münster, Münster, Germany

<sup>12</sup> University Hospitals Birmingham NHS Foundation Trust, Birmingham, United Kingdom

\* To whom correspondence should be addressed. Tel: 0049 551 395777; Fax: 0049 551 395699; Email: patapia.zafeiriou@med.uni-goettingen.de

Correspondence may also be addressed to Tel: 0049 551 3920730; Fax: 0049 551 395699; Email: laura.zelarayan@med.uni-goettingen.de

## Supplementary materials and methods

### *Electrophysiological study of isolated hearts*

Hearts were excised under terminal anesthesia, and the aorta was cannulated and retrogradely perfused using 37°C Krebs-Henseleit buffer (in mmol/l; NaCl 118, NaHCO<sub>3</sub> 24.88, KH<sub>2</sub>PO<sub>4</sub> 41.18, glucose 5.55, Na-pyruvate 2, MgSO<sub>4</sub> 0.83, CaCl<sub>2</sub> 1.8, KCl 4.7) equilibrated with a 95% O<sub>2</sub>/5% CO<sub>2</sub> gas mixture. The hearts were mounted on a vertical Langendorff apparatus (Hugo Sachs Electronic-Harvard Apparatus GmbH) and constantly perfused. An octapolar mouse electrophysiologic catheter (CIBER MOUSE; NuMED) was placed in the right atria and ventricles for atrial and ventricular pacing. Three monophasic action potentials (MAPs) were continuously and simultaneously recorded from the right ventricular free wall, septal area and left ventricular free wall epicardium <sup>1</sup>. Atrial S1 pacing was performed to measure activation times from right atrium to right ventricle; endocardial right ventricular pacing was performed to measure ventricular activation times and both for steady-state action potential durations. Ventricular arrhythmia inducibility was performed by programmed ventricular stimulation using a single encroaching premature stimulus (S2). All signals were digitized and stored on digital media for offline analysis. Experiments and analysis were performed blindly (for details <sup>2</sup>).

### *RNA-Sequencing*

Sequence images were transformed with Illumina software BaseCaller to bcl files, which were demultiplexed to fastq files with CASAVA (v1.8.2). Reads were aligned by STAR (2.3.9e) to the GENCODE *Mus musculus* transcriptome (mm10). Counting the reads to each gene was done via HTSeq-count python script. Data was preprocessed and analyzed in the R environment loading DESeq2, gplots, and biomaRt packages. Normalization, estimation of dispersions and testing for differentially expressed genes based on a test assuming negative binomial data distribution was computed via DESeq2. Candidate genes were filtered to a minimum of 0.8 log2fold change and FDR-corrected p-value<0.05. For functional association for the candidates genes were analyzed for gene ontology term enrichment via goseq.

### *Immunoblot Analysis*

Immunoblot analysis was performed as described previously <sup>3</sup>. The following primary and secondary antibodies were used: TBX5 (1:1000; Sigma HPA008786, Hamburg/Germany); TBX5 (1:1000; sc-515536, Santa Cruz Biotechnologies); CX43 (1:1000; AB1728, Millipore, Darmstadt/Germany); GIRK4 (1:250, Sigma HPA017353, Hamburg/Germany), GAPDH (1:50000; Millipore, Darmstadt/Germany); rb-HRP (1:5000; DAKO, Hamburg/Germany); ms-HRP (1:10,000; DAKO, Hamburg/Germany).

Except for the GIRK4 antibody, all blocking and antibody incubation steps were done in in 5% Milk (Applichem) diluted in TBS-T (GIRK4 in 5% BSA (Sigma-Aldrich)).

### *Chromatin Immunoprecipitation*

Adult murine ventricles were minced and crosslinked with 2% formaldehyde (Polysciences) in PBS supplemented with Protease Inhibitors (PI; Complete Mini, Roche). After 30 min, crosslinking was terminated by glycine addition at a final concentration of 125 mmol/l. The suspension was centrifuged at 300 g for 2 min at 4°C, washed with PBS and centrifuged again. Hypotonic buffer (2.38 g/l HEPES, 0.75 g/l KCl, 0.41 g/l MgCl<sub>2</sub>\*6 H<sub>2</sub>O, 0.037 g/l EDTA, 0.154 g/l DTT and PI) was added and samples were homogenized in a Tissue Lyser (Qiagen; 30 Hz- 120 sec). NP-40 was added to 1% final concentration, and upon 10 min incubation on ice the samples were centrifuged at 12,000 g for 2 min at 4°C. The pellet was resuspended in hypotonic buffer with 1% NP-40 upon 3 min incubation on ice, centrifuged at 12,000 g for 2 min at 4°C. The resulting pellet was resuspended in sonication buffer I (7.88 g/l Tris-HCl, 2.92 g/l EDTA, 10 g/l SDS, PI, pH 8), incubated on ice for 15 min, and subsequently sonication buffer II (7.88 g/l Tris-HCl, 5.84 g/l EDTA, 10 g/l NP-40, 8.77 g/l NaCl, 0.84 g NaF, PI, pH 8) was added. Samples were sonicated in ice-cold water in Bioruptor Standard (Diagenode) for 30 cycles (30 sec ON/OFF) then centrifuged for 10 min, at 12,000 g and 8°C. The pellet was resuspended in sonication buffer I + II (mixed 1:1 ratio), sonicated and centrifuged as described above. The chromatin-containing supernatant was collected and 500 µl of this fraction was used for each ChIP. Each sample was incubated with 1.5 ml ChIP incubation buffer (7.88 g/l Tris-HCl, 1.46 g/l EDTA, 2.92 g/l NaCl, PI, pH 7.5) containing 2 µg of antibody (TBX5: HPA008786 or ChIP grade rb-IgG - Millipore 12-370) overnight at 4°C. The next day, 50 µl protein A/G coated magnetic beads (Pierce) were added and samples were again incubated for 2 h at 4°C. Magnetic beads were subsequently washed for 5 min each with wash buffer I (7.88 g/l Tris-HCl, 2.92 g/l EDTA, 4.38 g/l NaCl, pH 7.5), wash buffer II (7.88 g/l Tris-HCl, 2.92 g/l EDTA, 7.31 g/l NaCl, pH 7.5) and wash buffer III (7.88 g/l Tris-HCl, 2.92 g/l EDTA, 10.23 g/l NaCl, pH 7.5). Finally, the immunoprecipitated chromatin was eluted by a 30 min incubation in ChIP elution buffer (7.88 g/l Tris-HCl, 1.46 g/l EDTA, 2.92 g/l NaCl, 10 g/l SDS, pH 7.5) at 65°C. The eluate was treated with proteinase K (ThermoScientific) for 1.5 h at 65°C and the chromatin was column purified (NucleoSpin PCR and Gel Clean-Up with Buffer NTB, Macherey Nagel). ChIP-Seq library preparation was performed using NEBNext Ultra DNA library prep kit for Illumina (E7370) according to manufacturer's instructions. Quantitation of DNA libraries was done on an Invitrogen Qubit 2.0 Fluorometer and the size range of DNA libraries was performed on an Agilent Bioanalyzer 2100 (High Sensitivity DNA Assay). DNA libraries were amplified and sequenced by using cBot and HiSeq2500 from Illumina (20-25 million reads per sample).

### *ChIP-sequencing data analysis*

Basic ChIP-Seq analysis was performed on Galaxy <sup>4</sup> on usegalaxy.org. In brief, the sequence reads were aligned to the mouse reference assembly (UCSC version mm9) using Bowtie <sup>5</sup>. Model Based Analysis of ChIP-Seq (MACS2) version 2.1.0.20140616.0, which is the updated version of MACS <sup>6</sup> was used for peak calling; IgG was used as a control file. Bedgraphs obtained from MACS2 were converted to bigwigs and visualized using the Integrative Genomics Viewer IGV 2.3.82 <sup>7, 8</sup>. To calculate the enriched genomic

regions in the TBX5-ChIP-Seq dataset 'CEAS: cis-regulatory element annotation system' <sup>9</sup> was used on Cistrome <sup>10</sup>. GREAT analysis was performed to annotate the peaks to genes and calculate enrichment of gene ontology clusters for biological processes and human phenotypes for TBX5 <sup>11</sup>. Heatmaps were generated using deepTools-computeMatrix and heatmapper options for the ChIP-Seq signal (in RPKM) using bamCoverage <sup>12</sup>. Co-Occupancy correlation was statistically analyzed with multibigwig summary and plot correlation on Galaxy. To identify TBX5-peaks, that are overlapping with H3K27ac and POL2, the WindowBed function (500 bp up- and downstream) from BEDTools was used in Galaxy <sup>12, 13</sup>. Motif Enrichment in the ChIP-Seq dataset was tested with AME <sup>14</sup> using known motifs for TBX5, MEIS1 and MEIS2, GATA4 and NKX2.5. Motifs used were identified by previous studies <sup>15, 16</sup> and MotifMap <sup>17, 18</sup>. InteractiVenn <sup>19</sup> was used to analyze the intersection between TBX5 bound genes (found in ChIP-Seq) and genes differentially expressed in TBX5 KO ventricle (cutoff  $p < 0.05$ ; Log2-fold-change  $> 0.8$  or  $< -0.8$  respectively). Gene ontology/pathway analyses were performed using a minimum of 4 genes per cluster and default parameters and stringency in 'ClueGO': a Cytoscape plug-in <sup>20, 21</sup> and the significant ( $p \leq 0.05$ ) cluster of 'Gene Ontology Biological Processes' were shown. For co-occupancy analysis, TBX5 peaks were compared to public data on active enhancers as H3K27ac and POL2 <sup>22</sup>, NKX2.5 <sup>23</sup>, GATA4 <sup>23</sup> and the TBX5 repressor TBX3 <sup>23</sup>.

#### *Immunofluorescence Staining*

Immunofluorescence staining was performed as described previously <sup>3</sup>. Tissues were rinsed in PBS, fixed overnight in 4% formaldehyde (FA) at 4 °C, embedded in paraffin, and sectioned at 4  $\mu\text{m}$ . Sections were deparaffinized, microwaved for antigen retrieval in citrate buffer (2,94 g/l sodium citrate, 0.5 ml/l Tween 20, pH 6.0), blocked in blocking buffer (5 % BSA and 0.1 % Triton-X-100 in PBS) different primary antibodies: TBX5 (1:50; sc-515536, Santa Cruz Biotechnologies), CX43 (1:200; AB1728, Millipore) and cTNT (1:200; ab8295, Abcam) in antibody staining buffer (1 % BSA and 0.1 % Triton-X-100 in PBS). Slides were washed in PBS and incubated with AlexaFluor488- or AlexaFluor594-conjugated secondary antibodies (1:200; Invitrogen). The slides were counterstained with DAPI and mounted with Mowiol 488 (Carl Roth). Images were captured using epifluorescence (IX70, Olympus) or confocal (Zeiss 710 NLO) microscopes. Isolated ventricular murine cardiomyocytes were stained with TBX5 (1:20; HPA008786; Sigma-Aldrich), CX43 (1:20; BD 610062, BD Biosciences), Phalloidin 633 (1:100; Invitrogen) and DAPI.

#### *Cloning and Enhancer Validation Assay*

Gja1-enhancer (chr10: 56980696 to 56981259) was cloned into pGL4.25 (Promega) with HindIII and XhoI. Kcnj5-enhancer (chr9: 32313616 to 32314540) was cloned into pGL4.23\_GW, which was a kind gift from Jorge Ferrer (Addgene plasmid # 60323) <sup>24</sup>, with HindIII and XhoI. TBX5 was cloned into pCMV2c-flag (Sigma) with EcoRI and Sall. Primers are listed in Table S1. All restriction enzymes were FastDigest enzymes (Thermo Scientific).

pCMV2c-flag was used as a control vector for TBX5 co-transfection. The empty vectors of pGL4.25 and pGI4.23\_GW were used as controls to exclude effects of TBX5 co-transfection on the vector backbone. The pGL4.23/25 vectors and pCMV2c vectors (250 ng each) and Renilla luciferase expressing plasmid (0.5 ng) were co-transfected in HEK293 cells (100.000 cells per well, 24-well plate, plated 24 hours before transfection) with Turbofect (Thermo Scientific). 24 hours later the Luciferase assay was done with the Dual-Luciferase Reporter Assay System in the Glomax Instrument (both Promega). Values of pCMV2c-TBX5-flag co-transfected samples were normalized to pCMV2c-flag co-transfected samples to calculate increase in activity by TBX5 overexpression.

## References and Notes:

1. Fabritz L, Kirchhof P, Franz MR, Eckardt L, Monnig G, Milberg P, Breithardt G, Haverkamp W. Prolonged action potential durations, increased dispersion of repolarization, and polymorphic ventricular tachycardia in a mouse model of proarrhythmia. *Basic Res Cardiol* 2003;**98**:25-32.
2. Wittkopper K, Fabritz L, Neef S, Ort KR, Grefe C, Unsold B, Kirchhof P, Maier LS, Hasenfuss G, Dobrev D, Eschenhagen T, El-Armouche A. Constitutively active phosphatase inhibitor-1 improves cardiac contractility in young mice but is deleterious after catecholaminergic stress and with aging. *The Journal of clinical investigation* 2010;**120**:617-626.
3. Zafiriou MP, Zelarayan LC, Noack C, Renger A, Nigam S, Siafaka-Kapadai A. Hepoxilin A(3) protects beta-cells from apoptosis in contrast to its precursor, 12-hydroperoxyeicosatetraenoic acid. *Biochim Biophys Acta* 2011;**1811**:361-369.
4. Afgan E, Baker D, van den Beek M, Blankenberg D, Bouvier D, Cech M, Chilton J, Clements D, Coraor N, Eberhard C, Gruning B, Guerler A, Hillman-Jackson J, Von Kuster G, Rasche E, Soranzo N, Turaga N, Taylor J, Nekrutenko A, Goecks J. The Galaxy platform for accessible, reproducible and collaborative biomedical analyses: 2016 update. *Nucleic Acids Res* 2016;**44**:W3-W10.
5. Langmead B. Aligning short sequencing reads with Bowtie. *Curr Protoc Bioinformatics* 2010;**Chapter 11**:Unit 11 17.
6. Zhang Y, Liu T, Meyer CA, Eeckhoute J, Johnson DS, Bernstein BE, Nusbaum C, Myers RM, Brown M, Li W, Liu XS. Model-based analysis of ChIP-Seq (MACS). *Genome Biol* 2008;**9**:R137.
7. Robinson JT, Thorvaldsdottir H, Winckler W, Guttman M, Lander ES, Getz G, Mesirov JP. Integrative genomics viewer. *Nat Biotechnol* 2011;**29**:24-26.
8. Thorvaldsdottir H, Robinson JT, Mesirov JP. Integrative Genomics Viewer (IGV): high-performance genomics data visualization and exploration. *Brief Bioinform* 2013;**14**:178-192.
9. Shin H, Liu T, Manrai AK, Liu XS. CEAS: cis-regulatory element annotation system. *Bioinformatics* 2009;**25**:2605-2606.
10. Liu T, Ortiz JA, Taing L, Meyer CA, Lee B, Zhang Y, Shin H, Wong SS, Ma J, Lei Y, Pape UJ, Poidinger M, Chen Y, Yeung K, Brown M, Turpaz Y, Liu XS. Cistrome: an integrative platform for transcriptional regulation studies. *Genome Biol* 2011;**12**:R83.
11. McLean CY, Bristor D, Hiller M, Clarke SL, Schaar BT, Lowe CB, Wenger AM, Bejerano G. GREAT improves functional interpretation of cis-regulatory regions. *Nat Biotechnol* 2010;**28**:495-501.
12. Ramirez F, Dundar F, Diehl S, Gruning BA, Manke T. deepTools: a flexible platform for exploring deep-sequencing data. *Nucleic Acids Res* 2014;**42**:W187-191.
13. Gruening BA. Galaxy wrapper. 2014.
14. McLeay RC, Bailey TL. Motif Enrichment Analysis: a unified framework and an evaluation on ChIP data. *BMC Bioinformatics* 2010;**11**:165.

15. Ghosh TK, Packham EA, Bonser AJ, Robinson TE, Cross SJ, Brook JD. Characterization of the TBX5 binding site and analysis of mutations that cause Holt-Oram syndrome. *Hum Mol Genet* 2001;**10**:1983-1994.
16. Grau J, Posch S, Grosse I, Keilwagen J. A general approach for discriminative de novo motif discovery from high-throughput data. *Nucleic Acids Res* 2013;**41**:e197.
17. Daily K, Patel VR, Rigor P, Xie X, Baldi P. MotifMap: integrative genome-wide maps of regulatory motif sites for model species. *BMC Bioinformatics* 2011;**12**:495.
18. Xie X, Rigor P, Baldi P. MotifMap: a human genome-wide map of candidate regulatory motif sites. *Bioinformatics* 2009;**25**:167-174.
19. Heberle H, Meirelles GV, da Silva FR, Telles GP, Minghim R. InteractiVenn: a web-based tool for the analysis of sets through Venn diagrams. *BMC Bioinformatics* 2015;**16**:169.
20. Bindea G, Galon J, Mlecnik B. CluePedia Cytoscape plugin: pathway insights using integrated experimental and in silico data. *Bioinformatics* 2013;**29**:661-663.
21. Bindea G, Mlecnik B, Hackl H, Charoentong P, Tosolini M, Kirilovsky A, Fridman WH, Pages F, Trajanoski Z, Galon J. ClueGO: a Cytoscape plug-in to decipher functionally grouped gene ontology and pathway annotation networks. *Bioinformatics* 2009;**25**:1091-1093.
22. He A, Gu F, Hu Y, Ma Q, Ye LY, Akiyama JA, Visel A, Pennacchio LA, Pu WT. Dynamic GATA4 enhancers shape the chromatin landscape central to heart development and disease. *Nat Commun* 2014;**5**:4907.
23. van den Boogaard M, Wong LY, Tessadori F, Bakker ML, Dreizehnter LK, Wakker V, Bezzina CR, t Hoen PA, Bakkers J, Barnett P, Christoffels VM. Genetic variation in T-box binding element functionally affects SCN5A/SCN10A enhancer. *The Journal of clinical investigation* 2012;**122**:2519-2530.
24. Pasquali L, Gaulton KJ, Rodriguez-Segui SA, Mularoni L, Miguel-Escalada I, Akerman I, Tena JJ, Moran I, Gomez-Marin C, van de Bunt M, Ponsa-Cobas J, Castro N, Nammo T, Cebola I, Garcia-Hurtado J, Maestro MA, Pattou F, Piemonti L, Berney T, Gloyn AL, Ravassard P, Gomez-Skarmeta JL, Muller F, McCarthy MI, Ferrer J. Pancreatic islet enhancer clusters enriched in type 2 diabetes risk-associated variants. *Nature genetics* 2014;**46**:136-143.

## SUPPLEMENTAL FIGURE LEGENDS

**Figure S1. Expression of TBX5 in the adult murine heart.** **A**, Co-staining of CX43 (green) and TBX5 (red) shows that besides the prominent atrial and AV node expression (panel I-II) lower levels of TBX5 are present in CX43pos cells throughout the ventricular myocardium (arrowheads, panel III), also in isolated ventricular cardiomyocytes (panel IV). **B**, Immunohistochemistry analysis of TBX5 in a longitudinal paraffin embedded murine heart. Strong TBX5 expression (brown) was detected at the atria and AV node (insert i and ii). Although TBX5 levels were lower in left and right ventricle (insert iii and iv respectively) TBX5 expression was evident throughout the myocardium. **C**, Immunofluorescence analysis of TBX5 expression in a transversal slice of the left ventricle. The different panels show TBX5 expression distributed along the endocardium, working myocardium and outer left ventricle. Secondary antibody incubation with DAPI served as a negative control (yellow color on the negative control is due to cardiomyocyte autofluorescence). Scale bars: 20  $\mu$ m

**Figure S2. Expression of TBX5 and CX43 in different WT and *vTbx5*KO hearts.** **A**, Co-staining of CX43 (green) and TBX5 (cyan) in different cardiac compartments of wild type and *vTbx5*KO hearts. Nuclei are depicted by dark blue DAPI staining. Left atria (LA) of *vTbx5*KO have lower amounts of TBX5 and CX43 in comparison to WT. In contrast to LA right and left ventricular tissue (RV and LV) are completely devoid from TBX5 and its target CX43. Low levels of TBX5 and CX43 are detectable in the endocardial regions of the ventricles. Scale bar: 20  $\mu$ m **B**, Immunohistochemistry analysis of TBX5 in a longitudinal paraffin embedded *vTbx5*KO heart that presents TBX5 (cyan) and CX43 (green) expression in the right atria (RA), the bundle of HIS and the septum. Strong TBX5 expression was detected in RA (1) and bundle of HIS (2) while the septum (3) did not express TBX5. The cyan signal observed was unspecific and not nuclear. **C**, Immunohistochemistry analysis of TBX5 (cyan) and CX43 (green) in a longitudinal paraffin embedded *vTbx5*KO heart slice. The overview picture on the right panel shows the presence of CX43 in both atria and absence from the working myocardium. Insert 1 shows a close-up of LA and LV and insert 2 shows the AV node. Insert 3 and 4 show a closeup view of LA and LV, respectively. LA and AV node show a remaining expression of TBX5 while LV show not TBX5 and sparse CX43 expression. Please note that the AV node does not express CX43. **D**, Immunohistochemistry analysis of TBX5 (cyan) and CX43 (green) in the RA and RV of *vTbx5*KO heart. After recombination TBX5 and CX43 are expressed in the RA (insert 1) but not the RV (insert 2). **E**, Semi-quantitative analysis of TBX5 positive nuclei in Flox and *vTbx5*KO hearts. Pictures used for the analysis were taken from left and right atria (Atria), left and right ventricle (ventricles) or compartments of the ventricular conduction system (VCS) as AV node and bundle of HIS. n=4-5 pictures from 3 different mice / group containing 50-100 nuclei. Statistical analysis was performed by one-way ANOVA followed by Sidak's multiple comparison post hoc test. \*P < 0.05.

**Figure S3. Basal functional characterization of *vTbx5*KO mice vs Cre control.** **A**, Echocardiography data from *control CRE* mice supporting no functional deterioration in contrast to *vTbx5*KO mice (n=10) **B**, No significant fibrosis in the KO animals compared to controls was observed. **C**, Statistical analysis of QT interval and heart rate (HR) obtained by telemetric ECG measurements 1-8 weeks post-rec. Line indicates Cre control mean value  $\pm$  SEM 4 weeks post-rec. (Cre n=6; Flox n =6; KO n=7-13 biological replicates. The animal number decreased during measurements due to SCD). QT interval significantly increased after TBX5 loss. The HR initially decreased probably due to AV blocks but 8 weeks post-rec the mean HR increased but the variability between the mice increased since some mice presented tachycardias. Statistical analysis was performed by one-way ANOVA followed by Sidak's multiple comparison post hoc test. All values were compared to the values prior recombination (pre). \* $P < 0.05$ , \*\* $P < 0.01$ , \*\*\* $P < 0.001$ . **D**, *Ex Vivo* burst pacing induced arrhythmia occurrence is higher (60%) in *vTbx5*KO mice vs Flox (23%) and Cre (38%) mice. Statistical analysis was performed by (A, B) paired student's t-test against the pre time point.

**Figure S4. Validation of endogenous TBX5 ChIP.** **A**, Successful chromatin-immunoprecipitation was confirmed by qPCR for the known TBX5 binding site downstream of *Scn5a*. **B**, The primers for this qPCR were designed using the fragment of the known enhancer for *Scn5a* (left panel). Another putative enhancer was detected between the *Scn5a* gene and the known enhancer (right panel) <sup>21</sup>. Five independent experiments. Statistical analysis was performed by Student's t-test, \* $P < 0.05$

**Figure S5. TBX5 loss negatively affects blood homeostasis.** **A**, Gene ontology analysis (ClueGO <sup>18, 19</sup>) of biological processes of the upregulated genes in *vTbx5*KO mice mainly include coagulation related genes. **B**, *vTbx5*KO atria 1 month upon recombination are enlarged and contain blood clots.

**Figure S6. Peaks on putative TBX5 targets related to cardiac electrophysiology.** TBX5 binds to active enhancers (indicated by H3K27ac and POL2 marks from <sup>22</sup>) together with NKX2.5 and GATA4 <sup>23</sup>. The same regulatory regions are bound by repressor TBX3 which is known to occupy the same regions with TBX5 <sup>23</sup>. Upper panels display the approximate genomic location, whereas lower panels show the enlarged region of interest (green bar) enlarged. Genomic regions of **A** *Gja5*, **B** *Kcng2*, **C** *Cacna1g* and **D** *Chrm2* **E** *Gja1* **F** *Kcnj5*

**Figure S7. Peaks on putative TBX5 targets linked to cardioprotective genes.** TBX5 binds to active enhancers (indicated by H3K27ac and POL2 marks from <sup>22</sup>) together with NKX2.5 and GATA4 <sup>23</sup>. The same regulatory regions are bound by repressor TBX3 which is known to occupy the same regions with TBX5 <sup>23</sup>. Upper panels display the approximate genomic location, whereas lower panels show the enlarged region of interest (green bar). Genomic regions of **A** *Fhl2*, **B** *Gpr22*, **C** *Fgf16*



**Figure S8. Peaks on putative TBX5 targets related to genes involved in cytoskeleton organization.** TBX5 binds to active enhancers (indicated by H3K27ac and POL2 marks from <sup>22</sup>) together with NKX2.5 and GATA4 <sup>23</sup>. The same regulatory regions are bound by repressor TBX3 which is known to occupy the same regions with TBX5 <sup>23</sup>. Upper panels display the approximate genomic location, whereas lower panels show the enlarged region of interest (green bar). Genomic regions of **A** *Emilin2*, **B** *Pdlim4*, **C** *Fstl4* and **D** *Cmya5*

**Figure S9. Analysis of CX43 and GIRK4 levels in *vTbx5*KO mice in different cardiac compartments.** **A**, CX43 and GIRK4 protein is strongly reduced in *vTbx5*KO ventricles at 4 weeks after recombination **B**, Time-course analysis of protein expression of CX43 and GIRK4 at 1, 2 and 4 weeks after recombination shows a significant protein reduction 1 week post-rec. **C**, *Gja1* mRNA levels remain unchanged in *vTbx5*KO atria. **D**, IGV depicting no TBX5 binding peak at 30 MB distance from the TSS as identified previously as a putative TBX5 enhancer for atrial *Gja1* <sup>23</sup>. Statistical analysis was performed by (A) two tailed tudent's t-test (B) two-way ANOVA followed by Sidak's multiple comparison post hoc test. \* $P < 0.05$ , \*\* $P < 0.01$ , \*\*\* $P < 0.001$ .

**Figure S10. Heart-specific re-expression of TBX5 leads to robust expression of TBX5 in the ventricle.** **A**, Western blot showing that TBX5 is specifically expressed in the heart, not in liver and spleen. **B**, Cross-sectional area analysis by WGA-FITC showing no cardiomyocyte hypertrophy of KO-RE hearts 8 weeks post AAV injections compared KO-CT (normal mouse cardiomyocytes CSA is about 200-300 $\mu\text{m}^2$ ) **C**, Heart weight (HW) to body weight (BW) ratio of injected mice is also normal and not indicative of cardiac hypertrophy. Please note that mice were injected with AAVs two weeks after recombination. **D**, Images of KO-CT and -RE mice showing that TBX5 overexpression did not induce any major abnormalities. Scale bar: 1 mm

**Figure S11. Heart-specific re-expression of TBX5 leads to robust expression of TBX5 and connexin 43 in the ventricle.** **A**, Overview of cross-sectional slices of 3 KO-CT (left) and 3 KO-RE (right) showing that TBX5 re-expression leads to robust CX43 re-expression in the whole heart. **B**, High magnification confocal images of 3 KO-CT (up) and 3 KO-RE (down) showing robust TBX5 and CX43 re-expression in KO-RE vs KO-CT.

## Supplementary Tables

**Table S1. Primer Sequences**

| name                    | Use       | primer fwd                                  | primer rev                         |
|-------------------------|-----------|---------------------------------------------|------------------------------------|
| <b><i>TBX5 rec</i></b>  | RT-(q)PCR | AGGCAGGGAGGAGAATGTTT                        | GGCTCTGCTTTGCCAGTTAC               |
| <b><i>Gja1</i></b>      | RT-(q)PCR | CACCACTTTGGCGTGCCGGCTT                      | TCAACCGCTGTCCCCAGGAGCC             |
| <b><i>Kcnj5</i></b>     | RT-(q)PCR | AGAAGTTAGCCCCAAGGGTTC                       | ATGCTCCCAAGTACACCCTG               |
| <b><i>Kcng2</i></b>     | RT-(q)PCR | AATTCAGGAAAGTGAAAAGTCTTGG                   | TTGGTCCTCCGTTGAGCTTG               |
| <b><i>Cacna1g</i></b>   | RT-(q)PCR | AGGAGAAGCAGATGGCCGA                         | GTACACAGGTGGTGGACGAG               |
| <b><i>Chrm2</i></b>     | RT-(q)PCR | CAGACTCCACCAGATCGCAG                        | GGATCCAGCCACAAGGACAA               |
| <b><i>Fhl2</i></b>      | RT-(q)PCR | AAGGAGGAGAACCCACACTG                        | GTGCCGATCCTTGTAGGACA               |
| <b><i>Gpr22</i></b>     | RT-(q)PCR | GTGAGCCCAAAGGCCATAA                         | CGCACCGTGACGTTTGATTC               |
| <b><i>Fgf16</i></b>     | RT-(q)PCR | TGATCAGCATCAGGGGAGTG                        | CAAGGTGGAGGCATAGGTGT               |
| <b><i>Fstl4</i></b>     | RT-(q)PCR | CCACGTCCTGCAGGTGAAT                         | GCCAAGAGGGAGAGCTGTTT               |
| <b><i>Cmya5</i></b>     | RT-(q)PCR | CTGCCGCGTTCTCACTTTTC                        | TGGGGTTCTAGTCTGGGAGG               |
| <b><i>Emilin2</i></b>   | RT-(q)PCR | GCAGCTTGTGGAAGTGCATC                        | TCGGTTGCTTCTGAGGGTTC               |
| <b><i>Pdlim4</i></b>    | RT-(q)PCR | CGGGATCGTGGAACCATTG                         | CCACATCATATCCCTCCGGC               |
| <b><i>Gapdh</i></b>     | RT-(q)PCR | ATGTTCCAGTATGACTCCACTCACG                   | GAAGACACCAGTAGACTCCACGAC<br>A      |
| <b><i>Scn5a</i></b>     | ChIP-PCR  | GGTGTGAATGAGGGAGGCAG                        | GGGTGTCTGGGACAGGAGAT               |
| <b><i>Gja1-enh</i></b>  | cloning   | TATCTCGAGGTTGTAACATCAACTTTAT<br>AATGAAATATC | TATAAGCTTACCACTTGTGCCTGCT<br>G     |
| <b><i>Kcnj5-enh</i></b> | cloning   | CTCGAGGAGGCAGGGCTAGAGAAGA                   | GAAGCTTGGTGGGTGAGTTTTGAG<br>CAG    |
| <b><i>Tbx5-CDS</i></b>  | cloning   | GCTATAGAATTCTGGCCGATACAGATG<br>AGGG         | TATAGTCGACGCTATTCTCACTCCA<br>CTCTG |

Full list of down- and upregulated genes: as Excel-file S2

**Table S3: Gene Ontology Analysis of downregulated genes in v *Tbx5*KO ventricles**

| GO-Term                                                  | Term p-value corrected   |        | Associated genes                                                                   |
|----------------------------------------------------------|--------------------------|--------|------------------------------------------------------------------------------------|
| <b>muscle adaptation</b>                                 | 550.0 x 10 <sup>-6</sup> | 4.12 % | [Casq1, Cmya5, Il15, Nppb]                                                         |
| <b>potassium ion trans-membrane transport</b>            | 370.0 x 10 <sup>-6</sup> | 3.17 % | [Cnga3, Kcng2, Kcnip2, Kcnj5, Kcnv2, Stk39]                                        |
| <b>muscle system process</b>                             | 120.0 x 10 <sup>-9</sup> | 3.32 % | [Adra1b, Cacna1g, Casq1, Chrm2, Cmya5, Ctgf, Gja1, Il15, Kcnj5, Myl1, Nppb, Scn5a] |
| <b>regulation of muscle system process</b>               | 360.0 x 10 <sup>-6</sup> | 3.03 % | [Adra1b, Casq1, Chrm2, Cmya5, Ctgf, Scn5a]                                         |
| <b>regulation of blood circulation</b>                   | 10.0 x 10 <sup>-6</sup>  | 3.83 % | [Adra1b, Cacna1g, Chrm2, Ctgf, Dbh, Gja1, Kcnj5, Scn5a]                            |
| <b>striated muscle contraction</b>                       | 18.0 x 10 <sup>-6</sup>  | 4.35 % | [Adra1b, Cacna1g, Casq1, Ctgf, Kcnj5, Myl1, Scn5a]                                 |
| <b>heart contraction</b>                                 | 9.0 x 10 <sup>-6</sup>   | 3.98 % | [Adra1b, Cacna1g, Chrm2, Ctgf, Gja1, Kcnj5, Myl1, Scn5a]                           |
| <b>regulation of heart rate</b>                          | 830.0 x 10 <sup>-6</sup> | 4.44 % | [Adra1b, Cacna1g, Kcnj5, Scn5a]                                                    |
| <b>cell communication involved in cardiac conduction</b> | 95.0 x 10 <sup>-6</sup>  | 9.76 % | [Cacna1g, Gja1, Kcnj5, Scn5a]                                                      |

**Table S4: Gene Ontology Analysis of upregulated genes in v *Tbx5*KO ventricles**

| GO-ID             | GO-Term             | Term p-value corrected |        | Associated genes                              |
|-------------------|---------------------|------------------------|--------|-----------------------------------------------|
| <b>GO:0007596</b> | blood coagulation   | 3.2 x 10 <sup>-6</sup> | 3.72 % | [F5, Fermt3, Gp9, Hpse, Itga2b, P2ry12, Plek] |
| <b>GO:0030168</b> | platelet activation | 9.2 x 10 <sup>-6</sup> | 5.38 % | [F5, Fermt3, Itga2b, P2ry12, Plek]            |

Full list of intersecting genes: as Excel-file S5

**A****TBX5 CX43 Nuclei**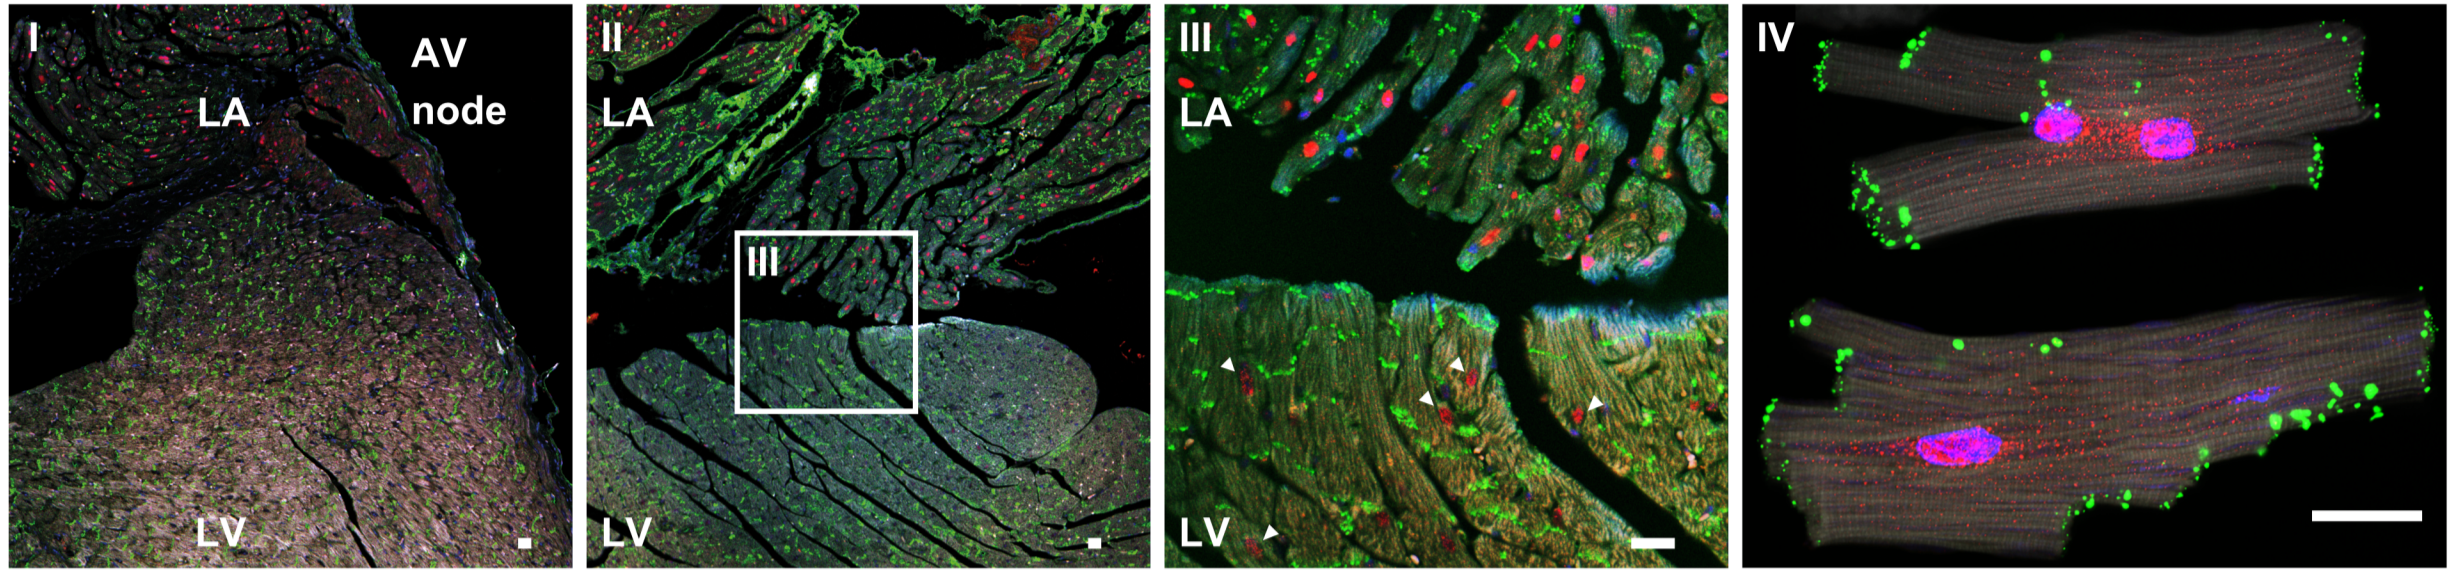**B**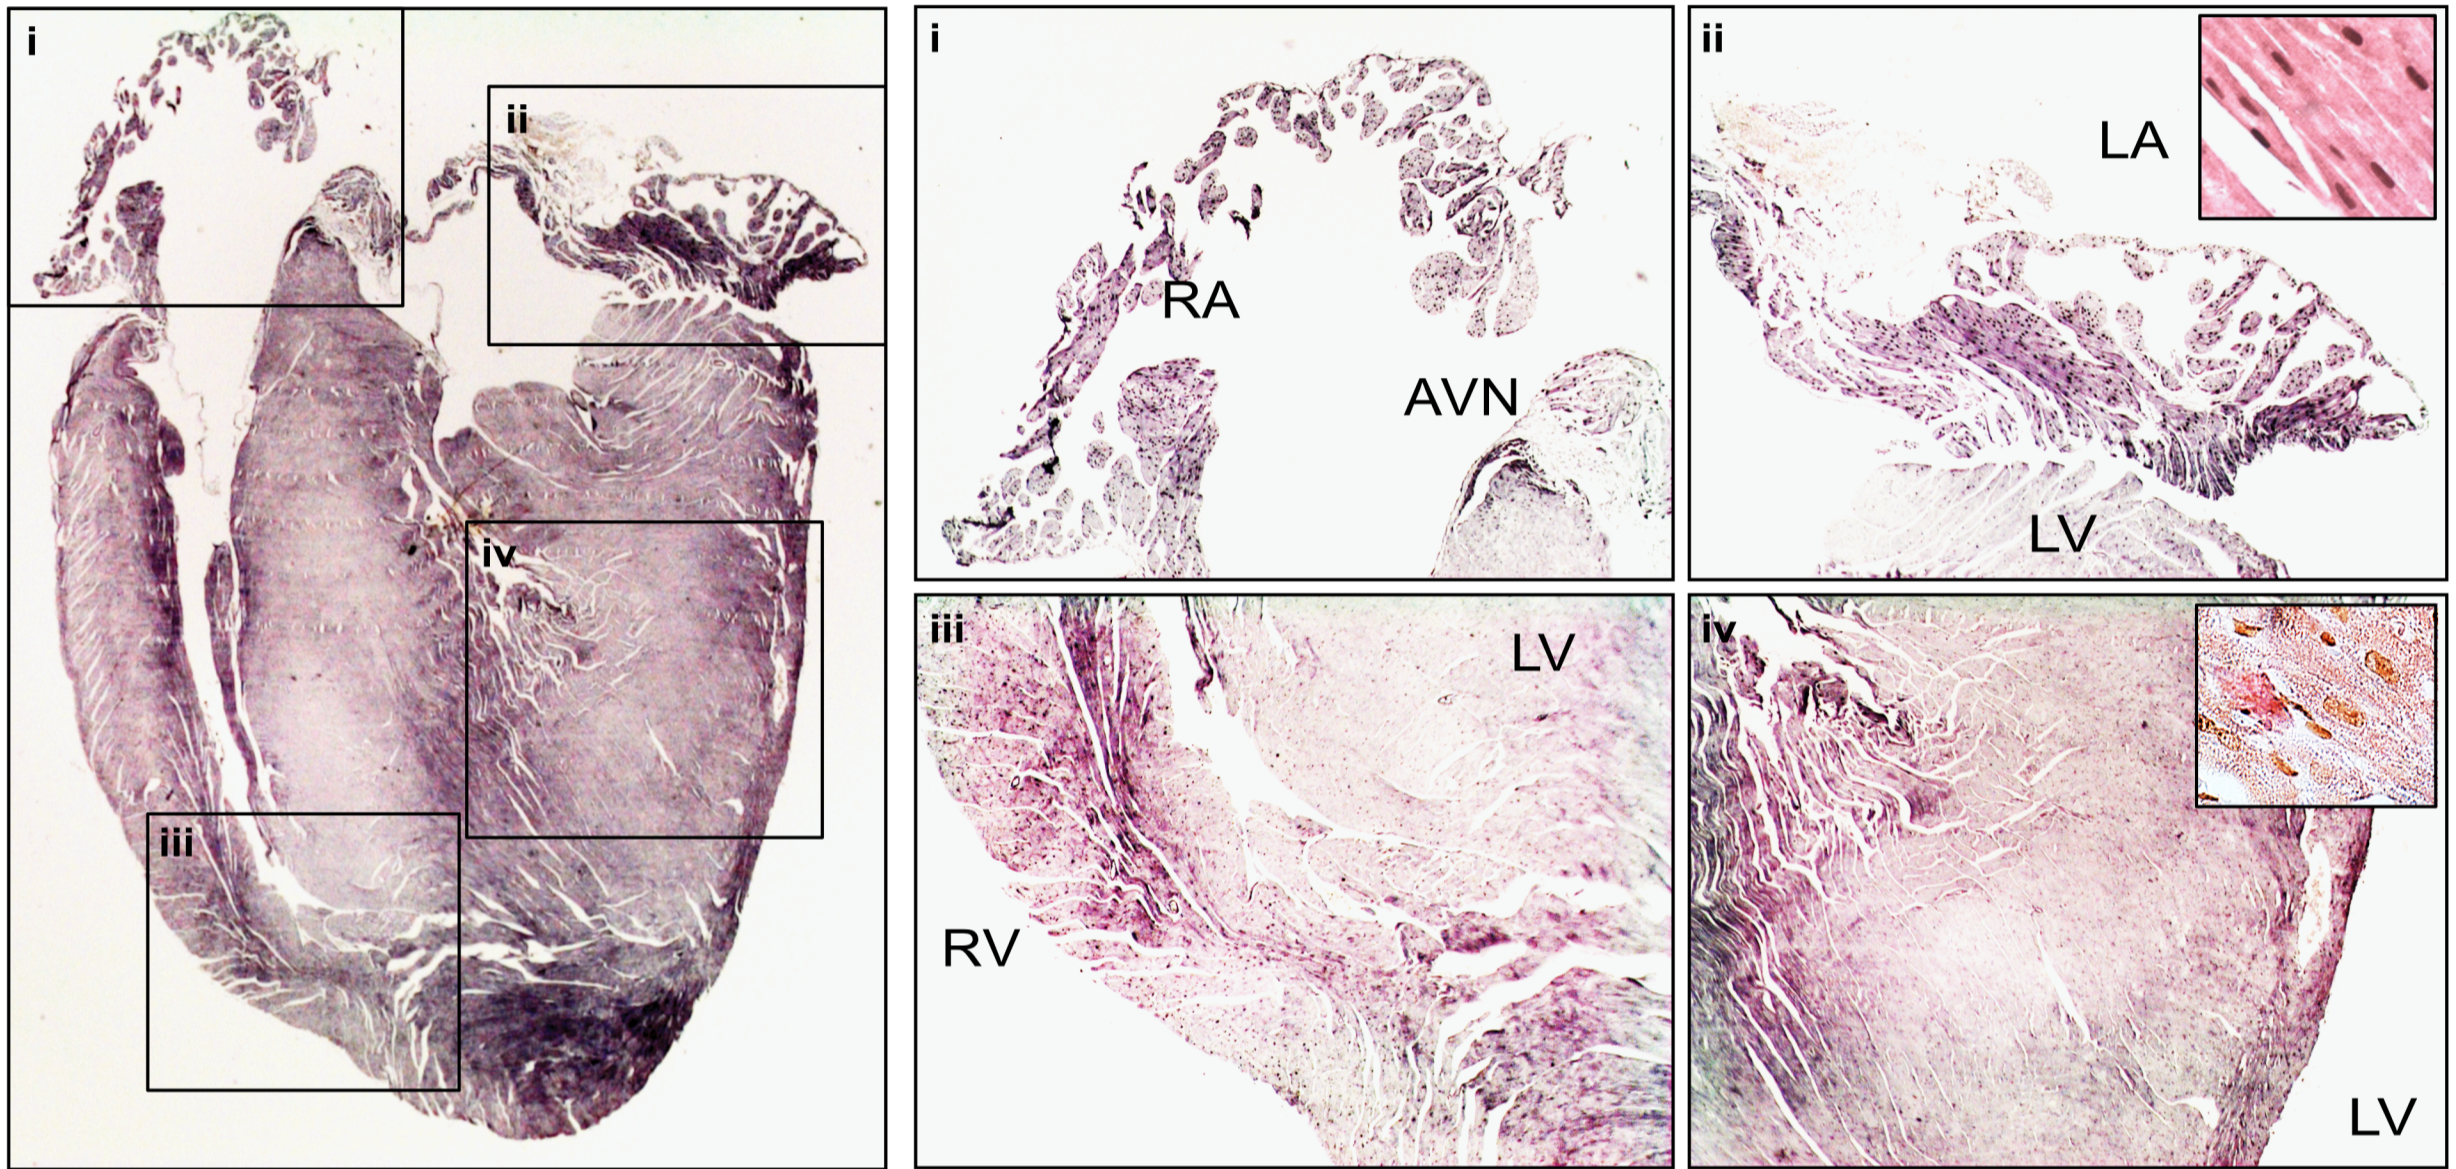**C**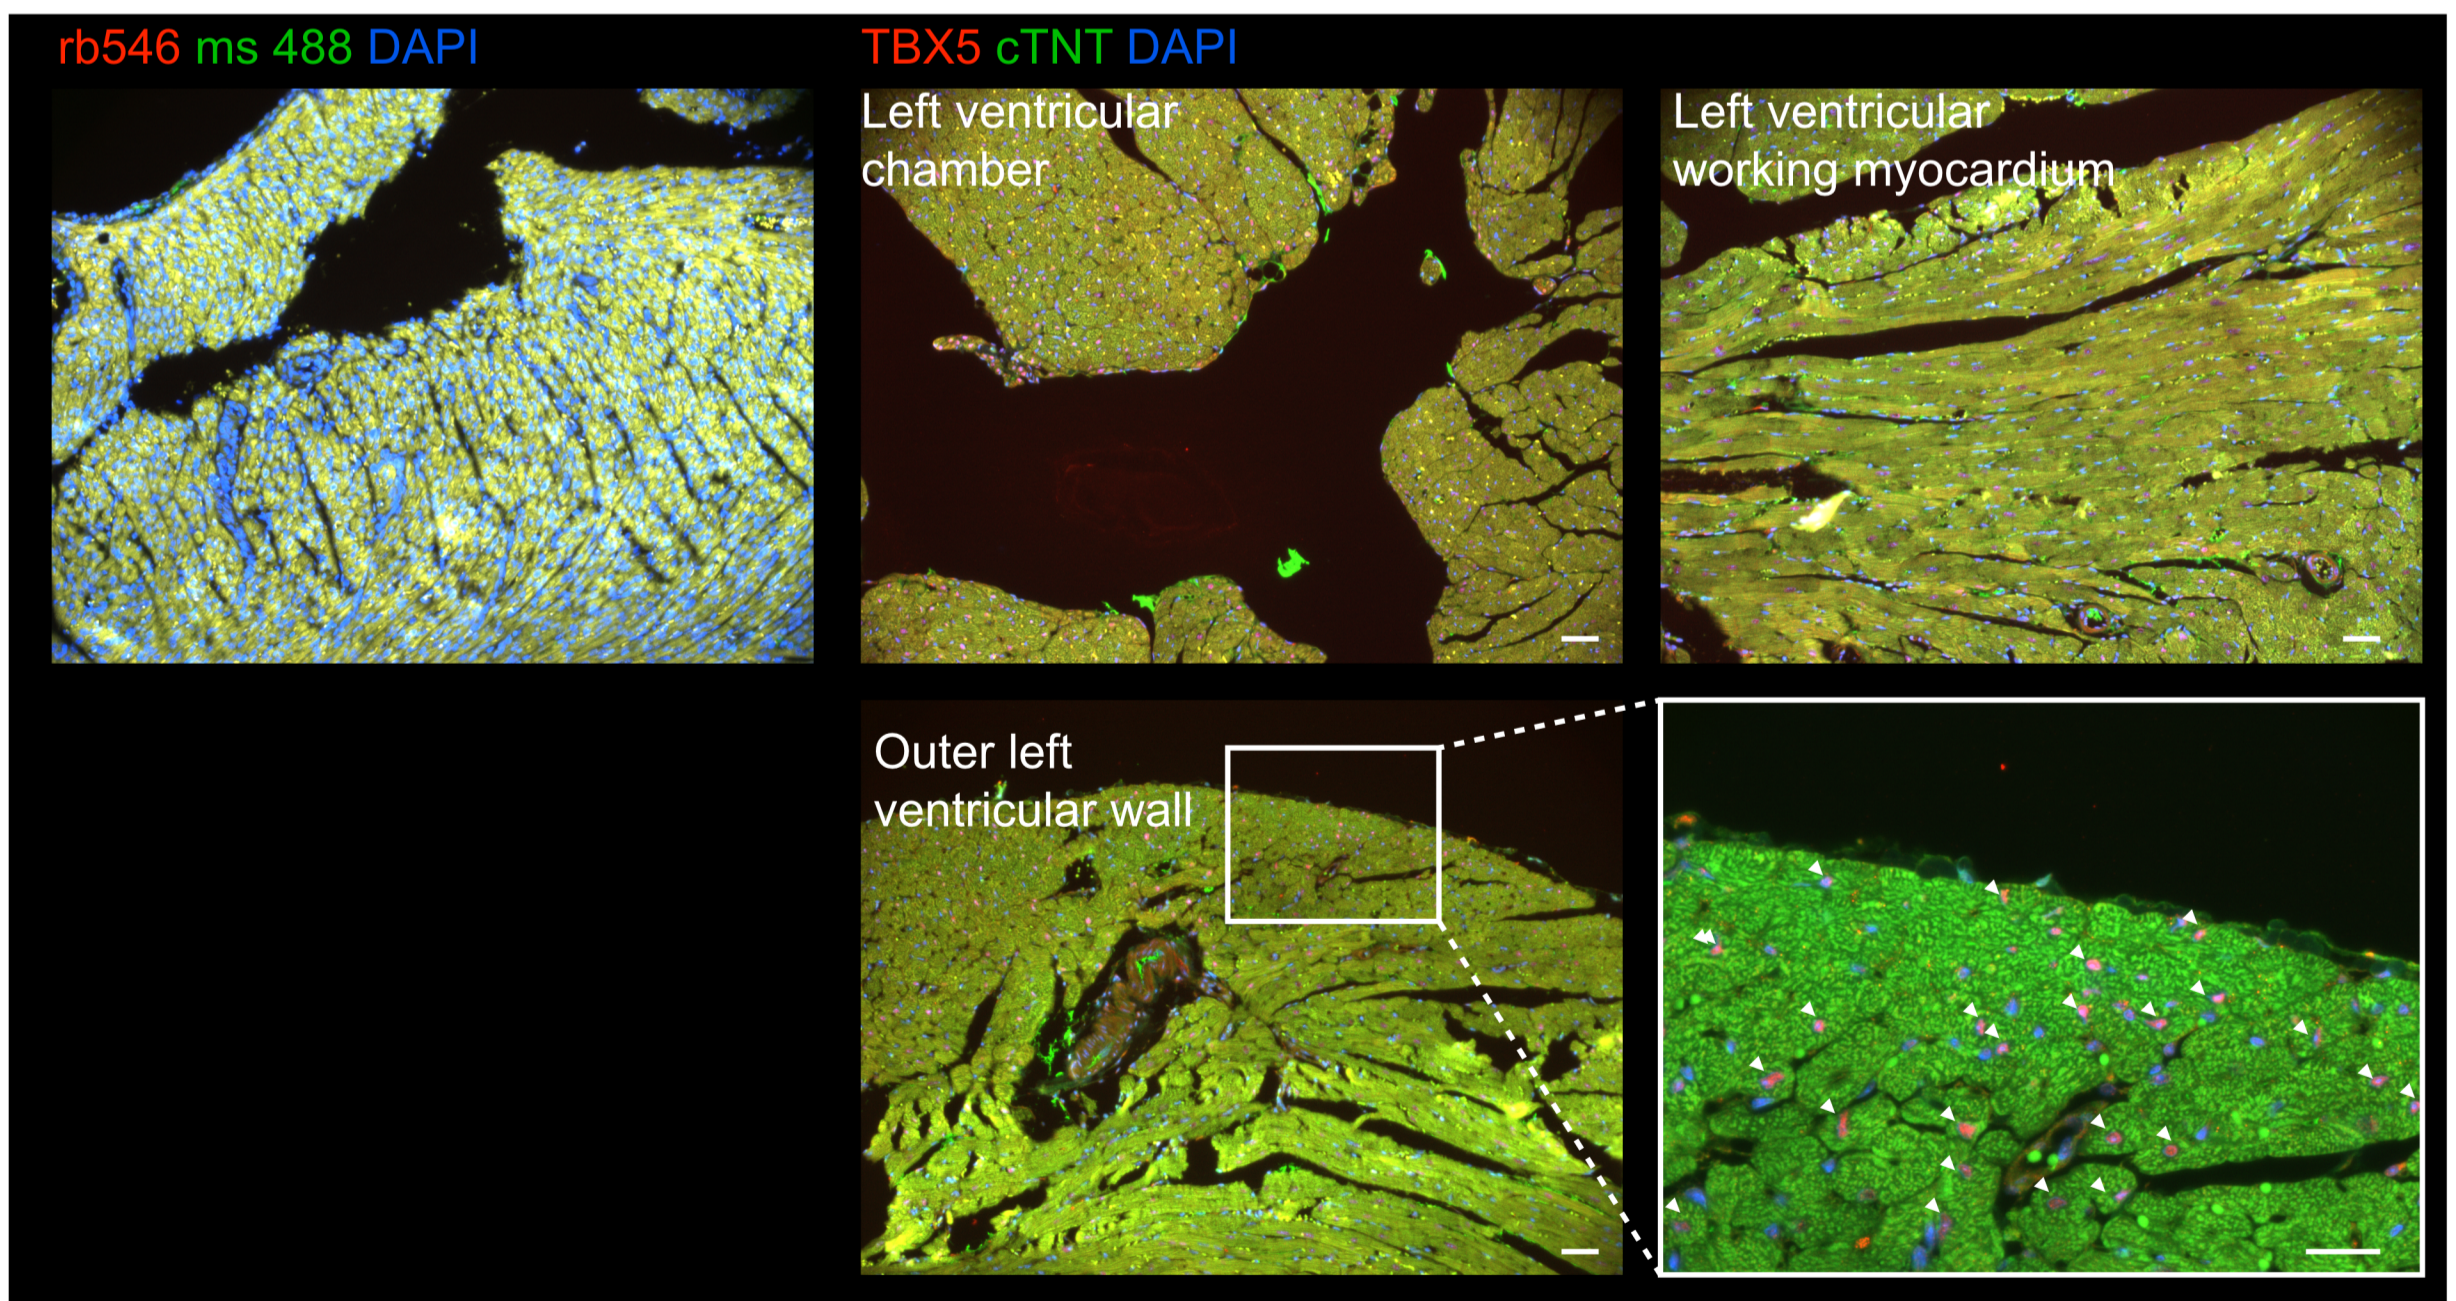

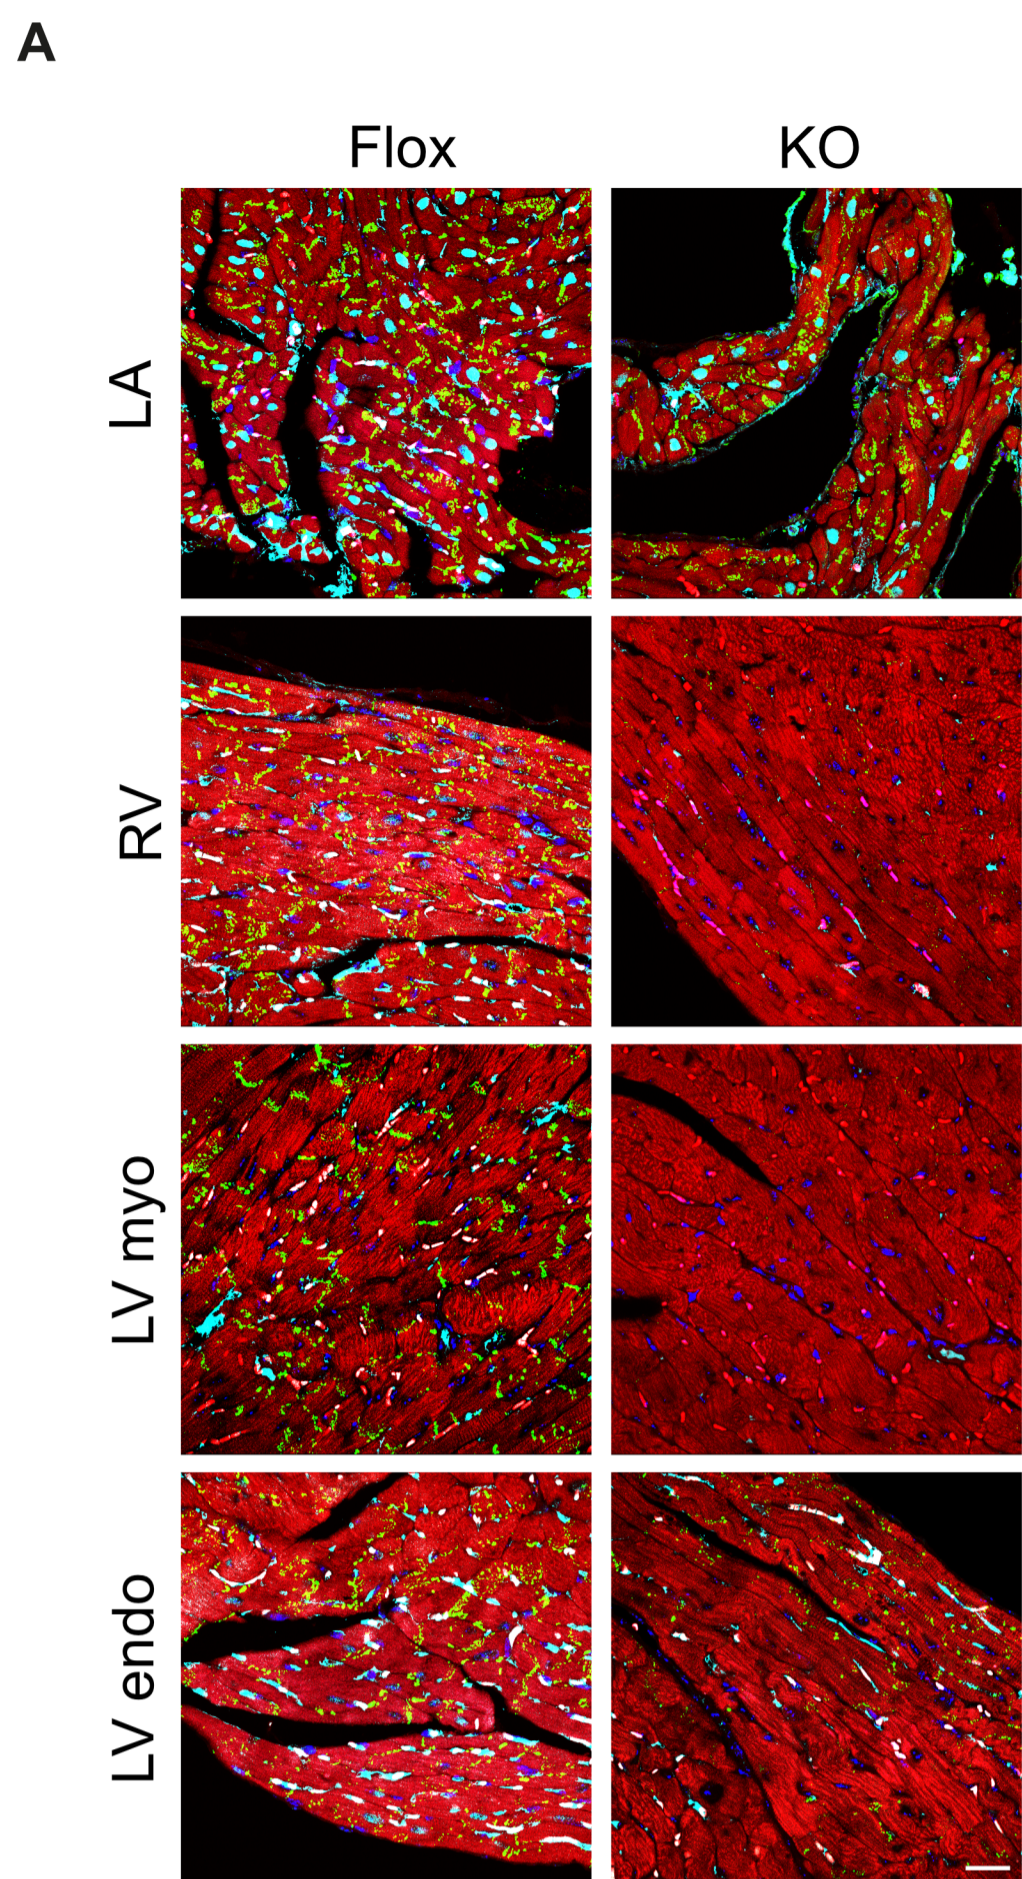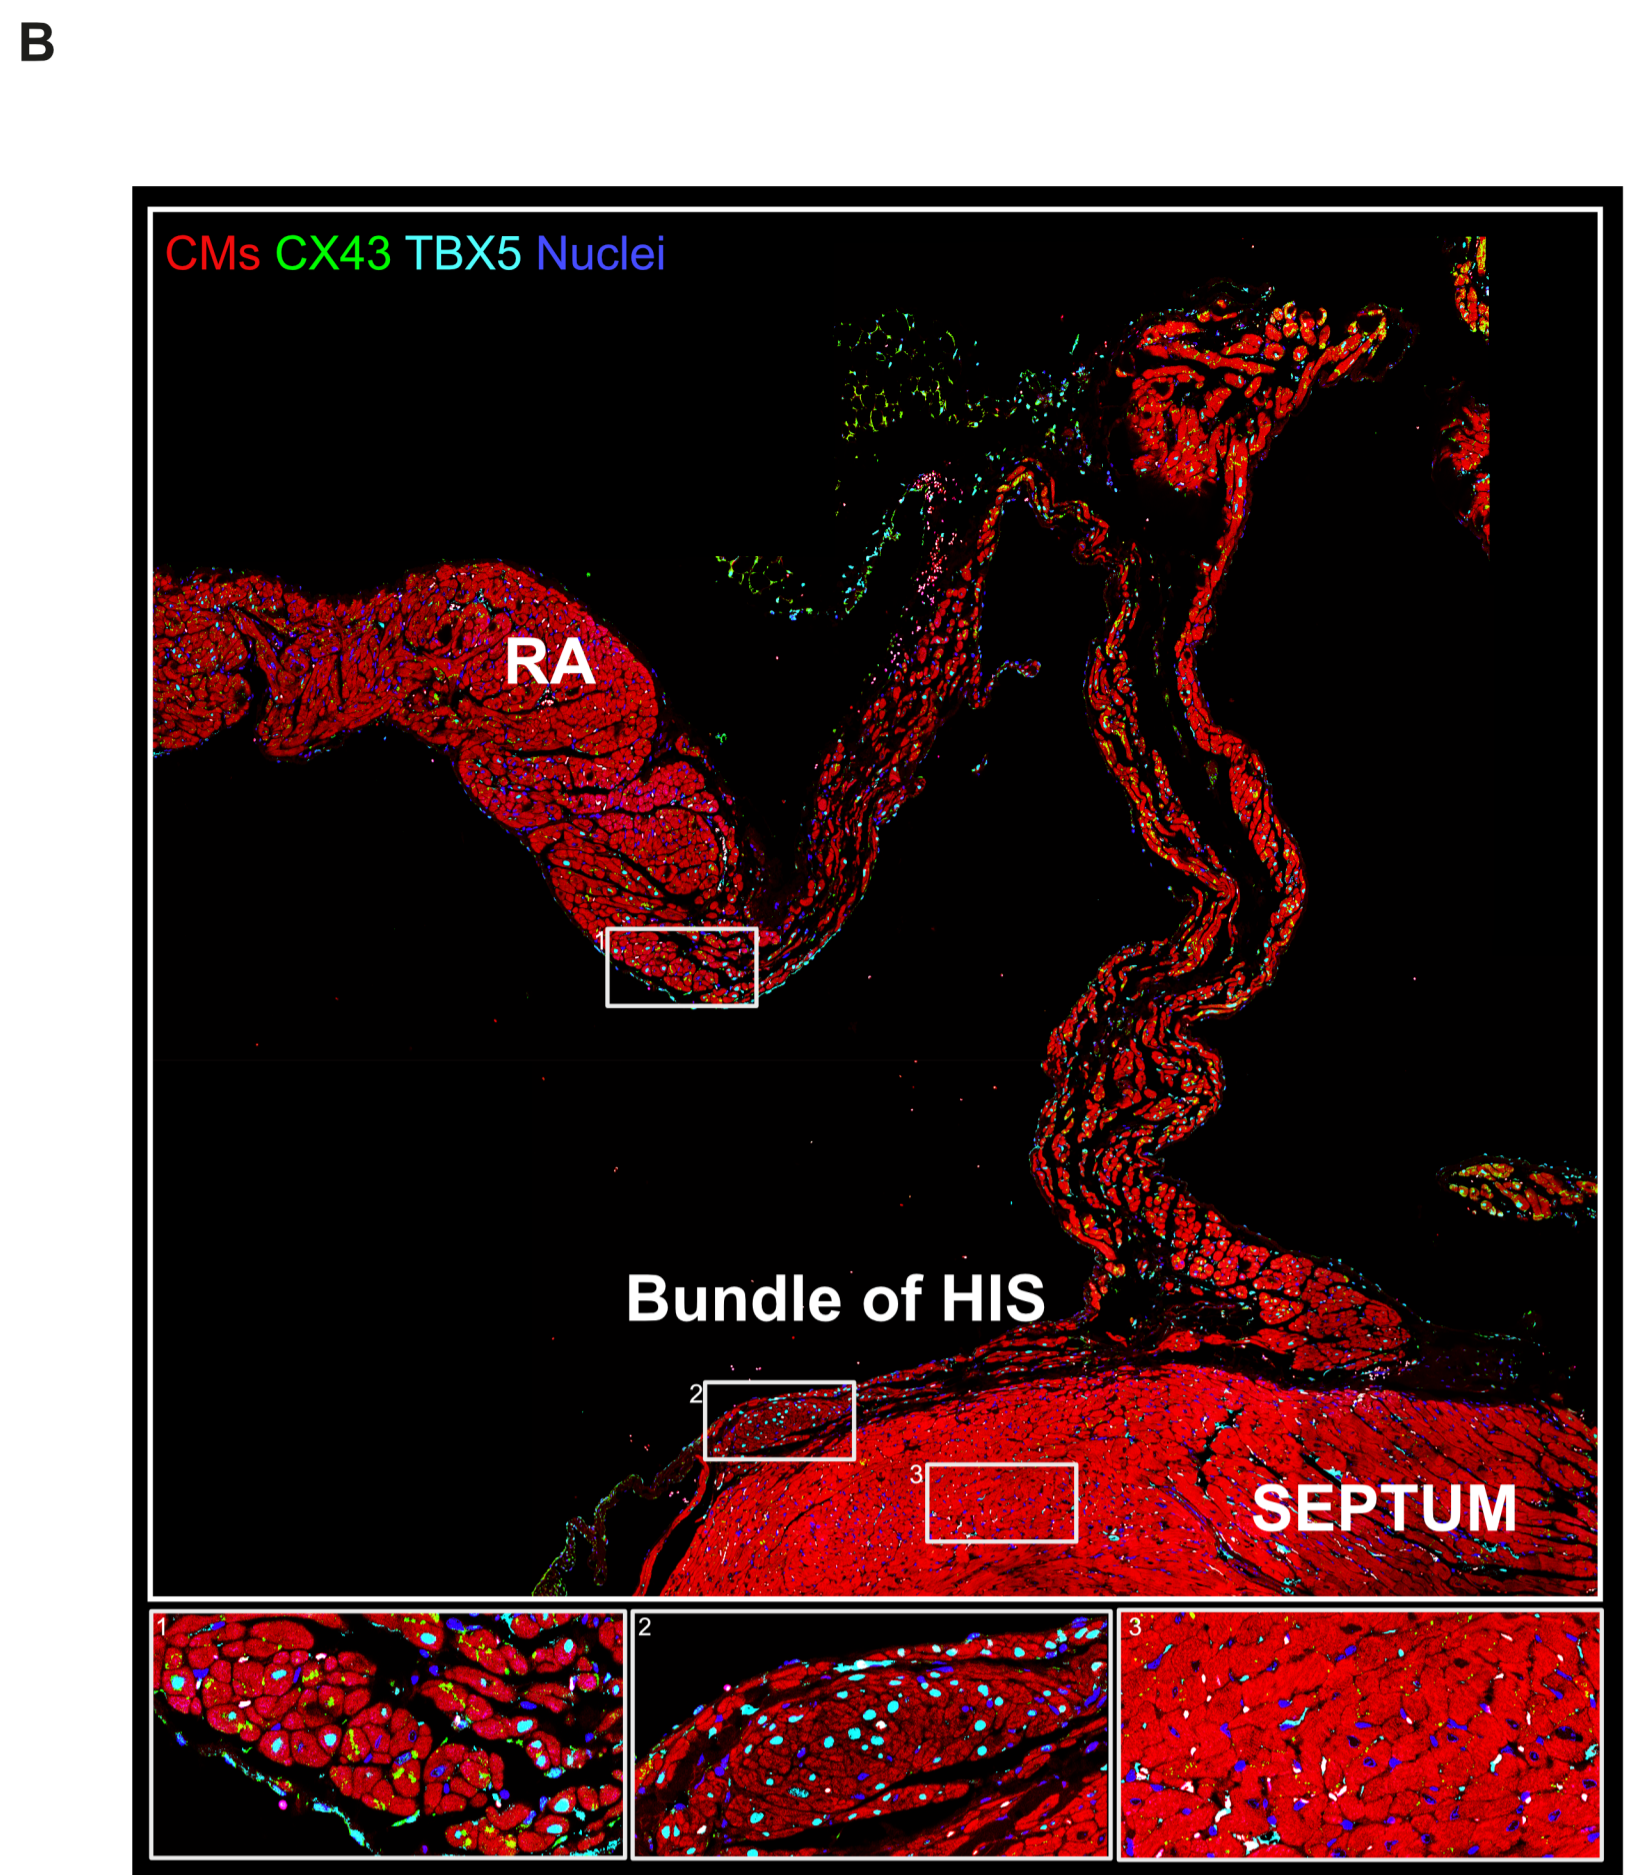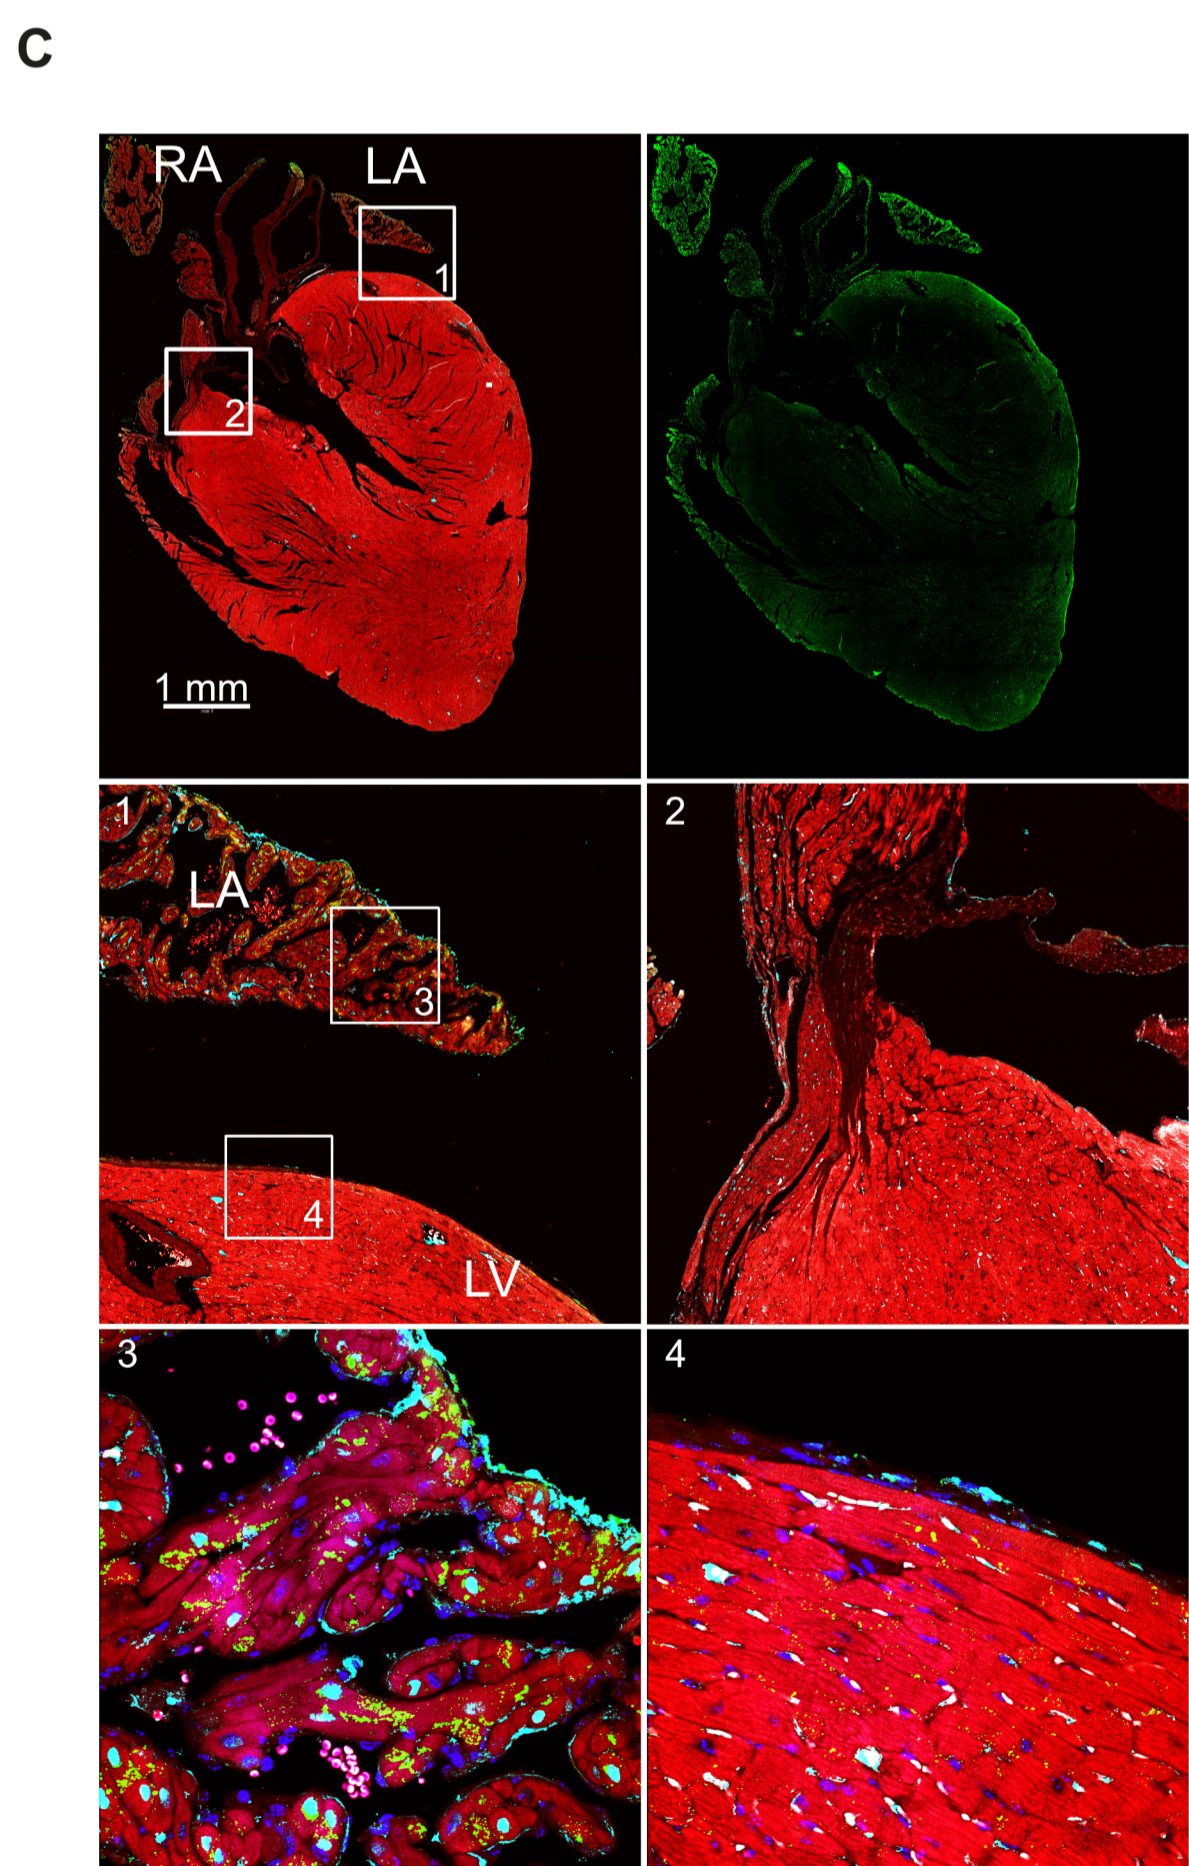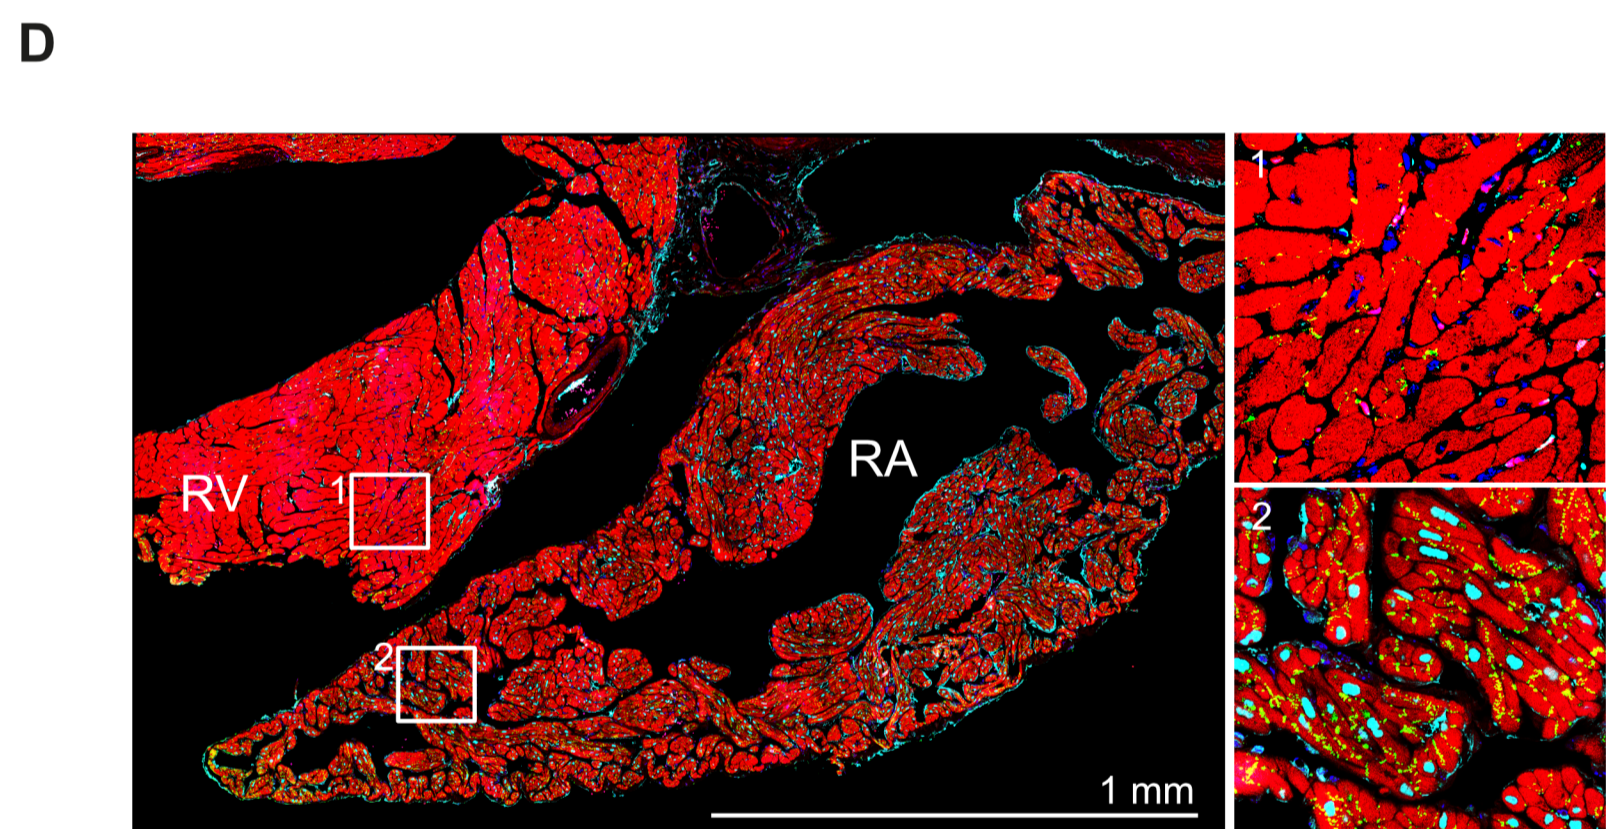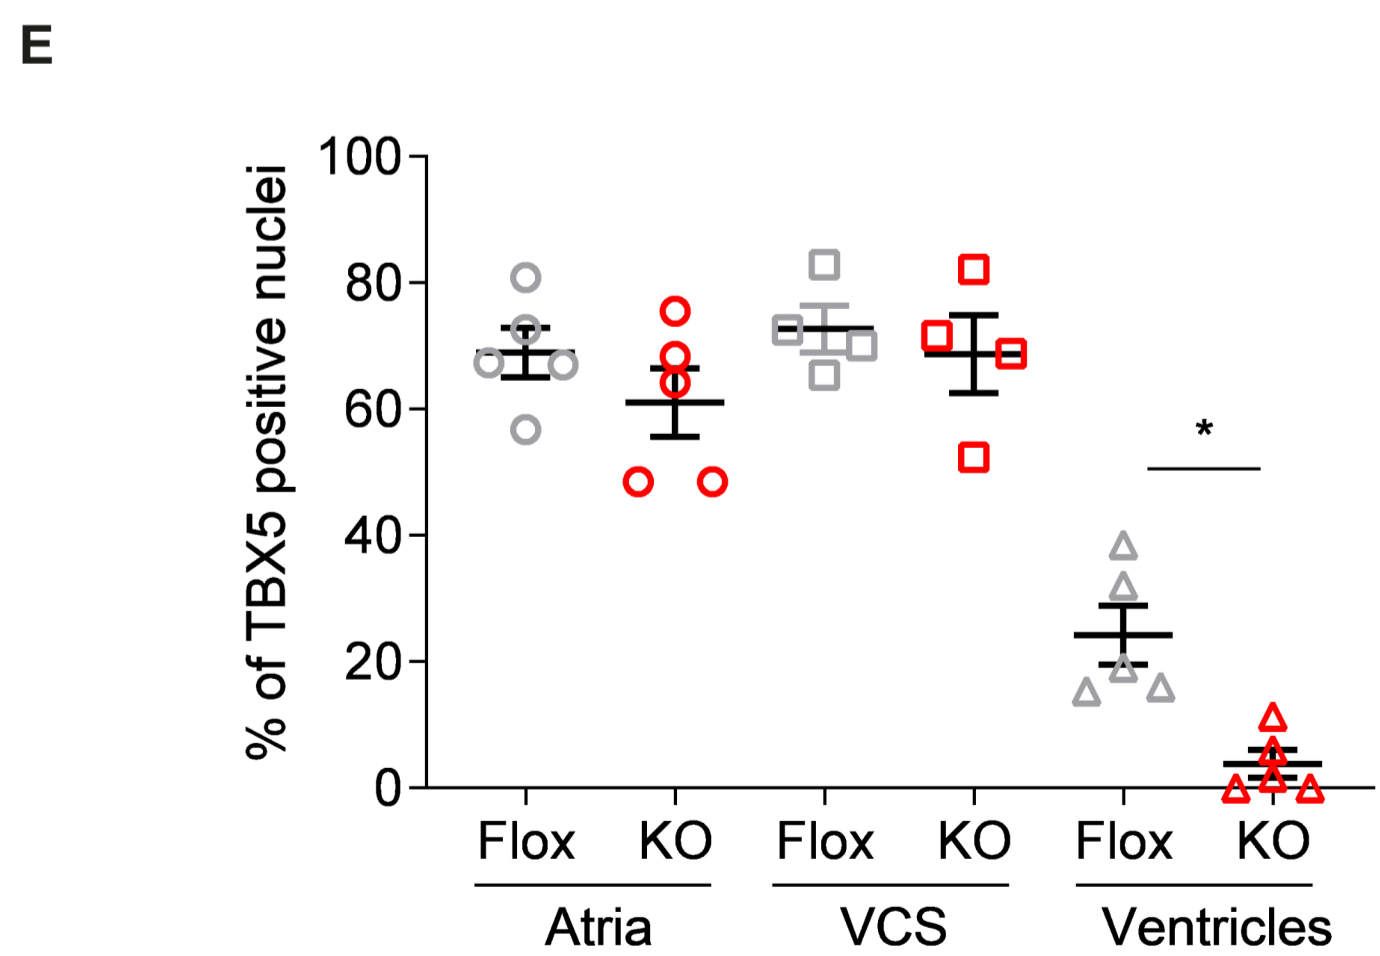

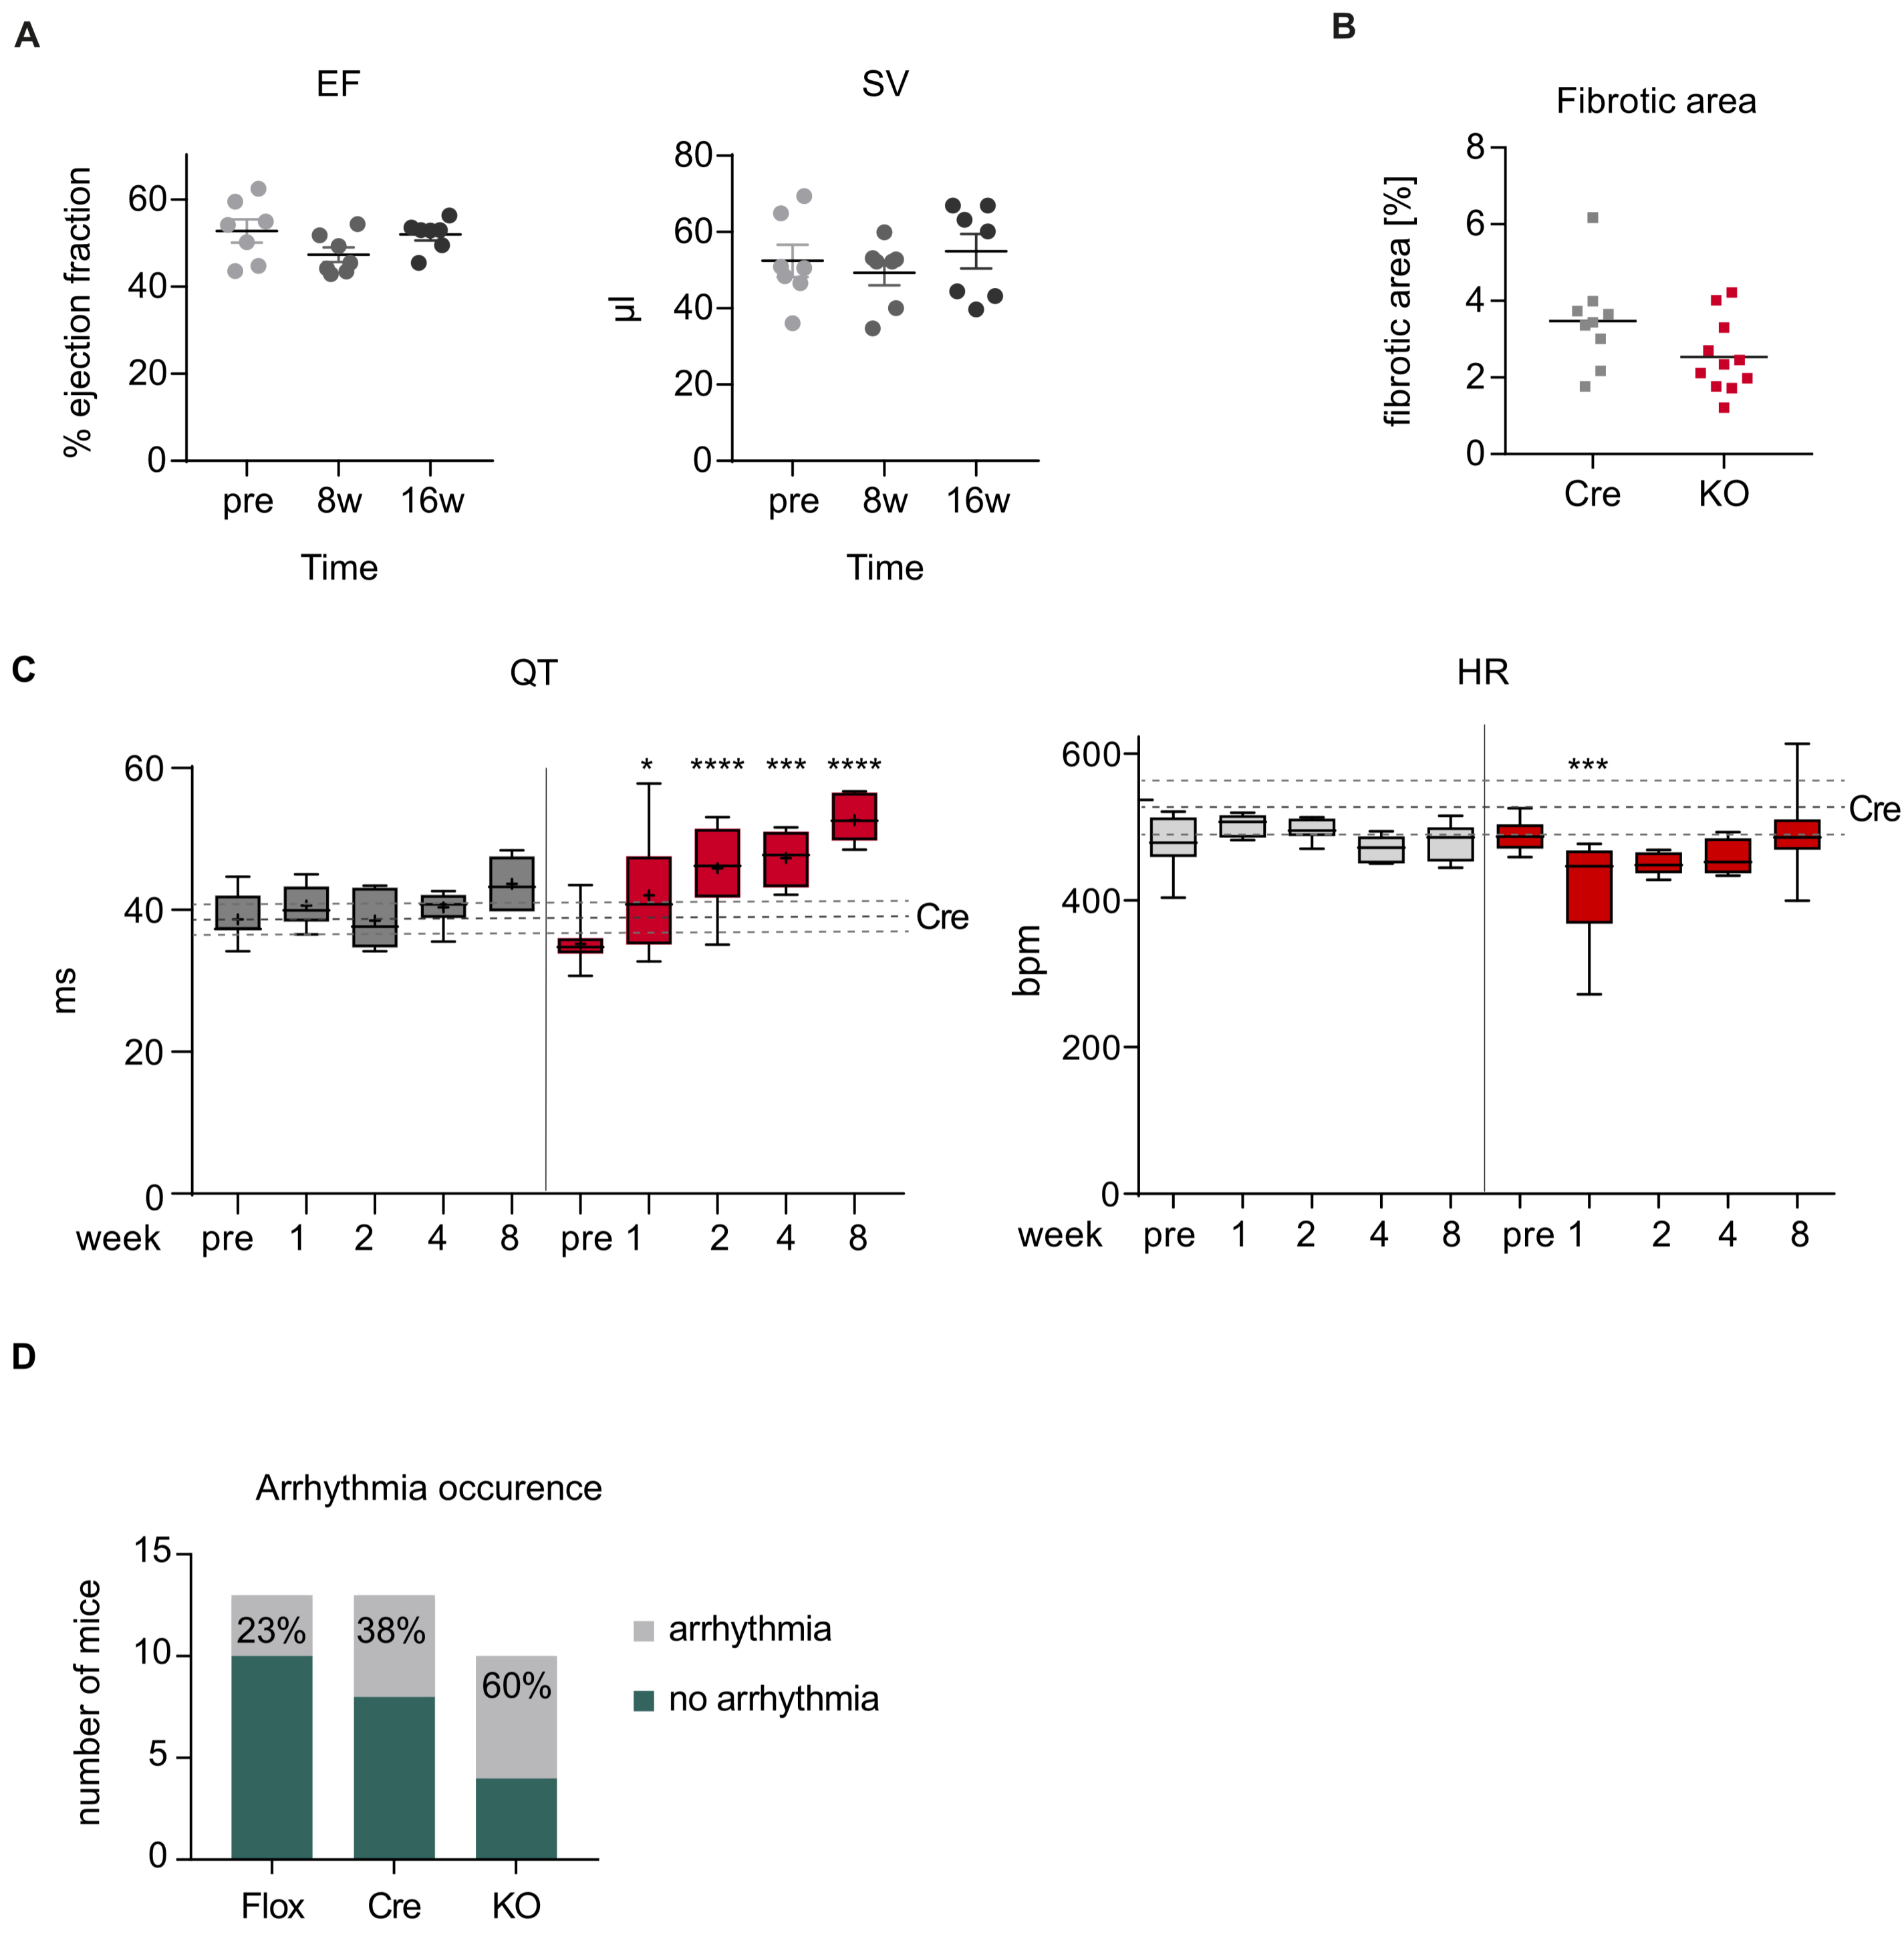

Figure S3

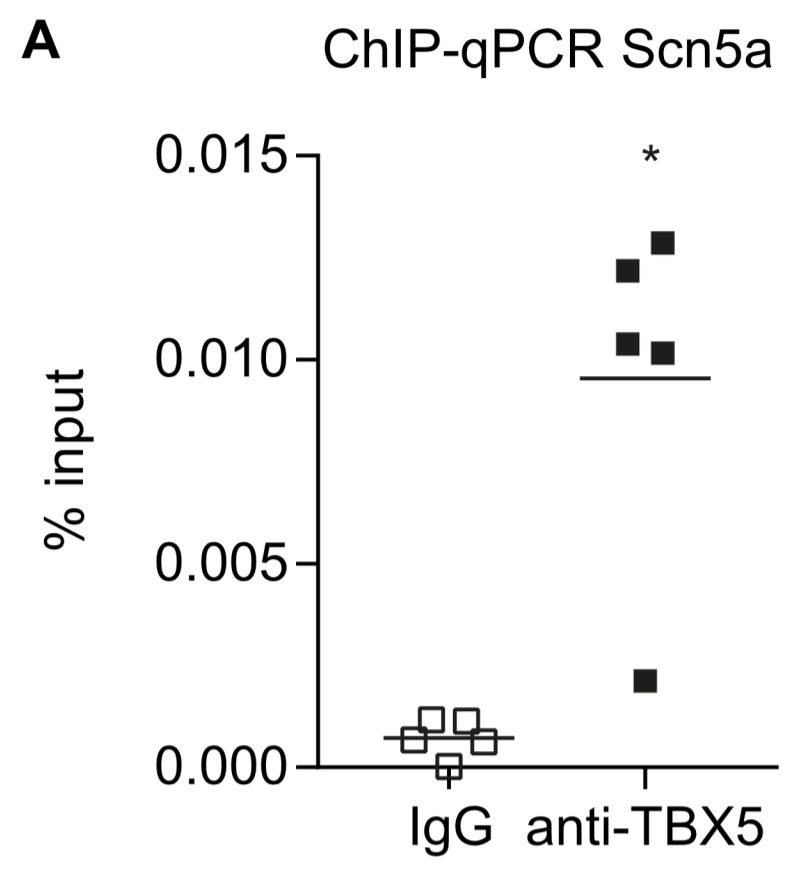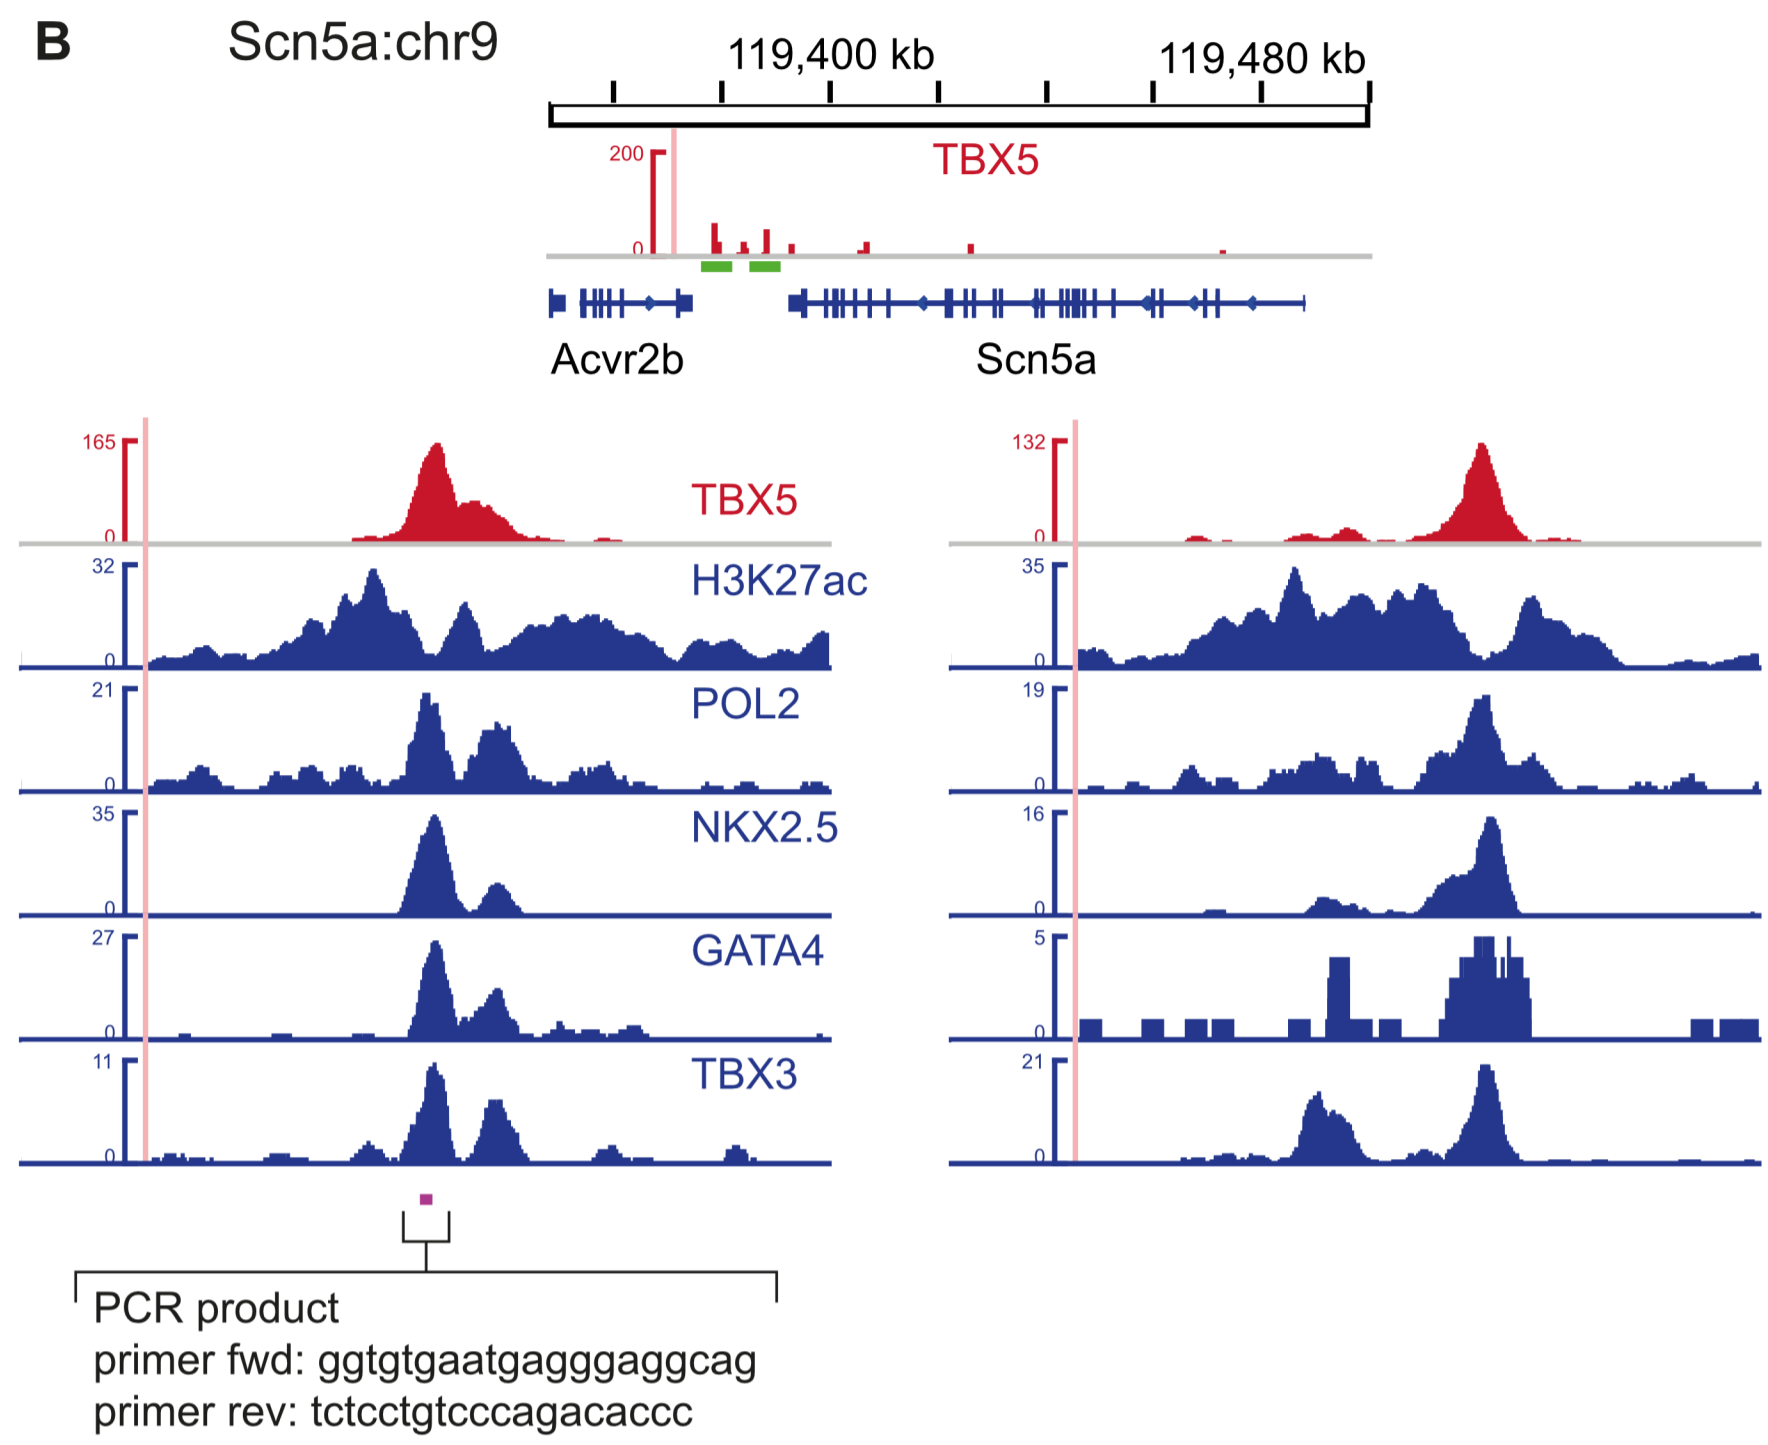

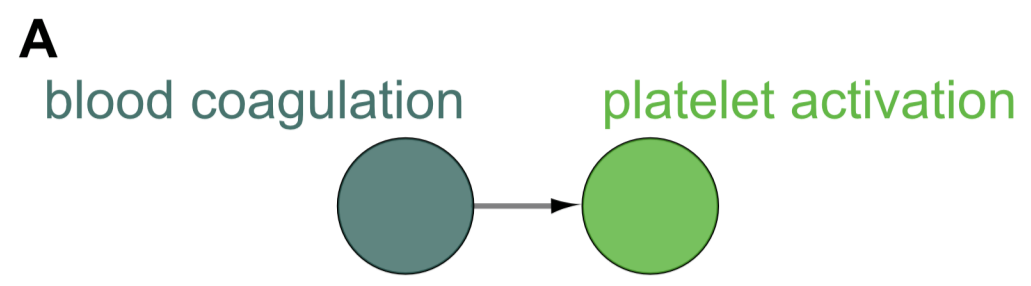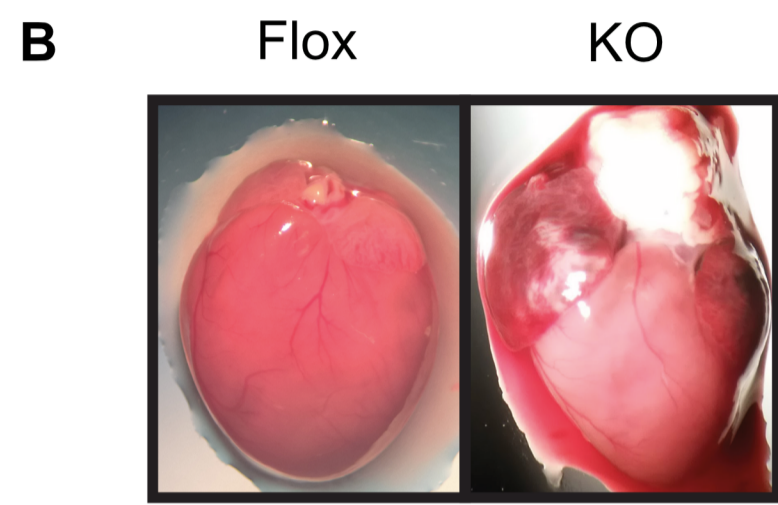



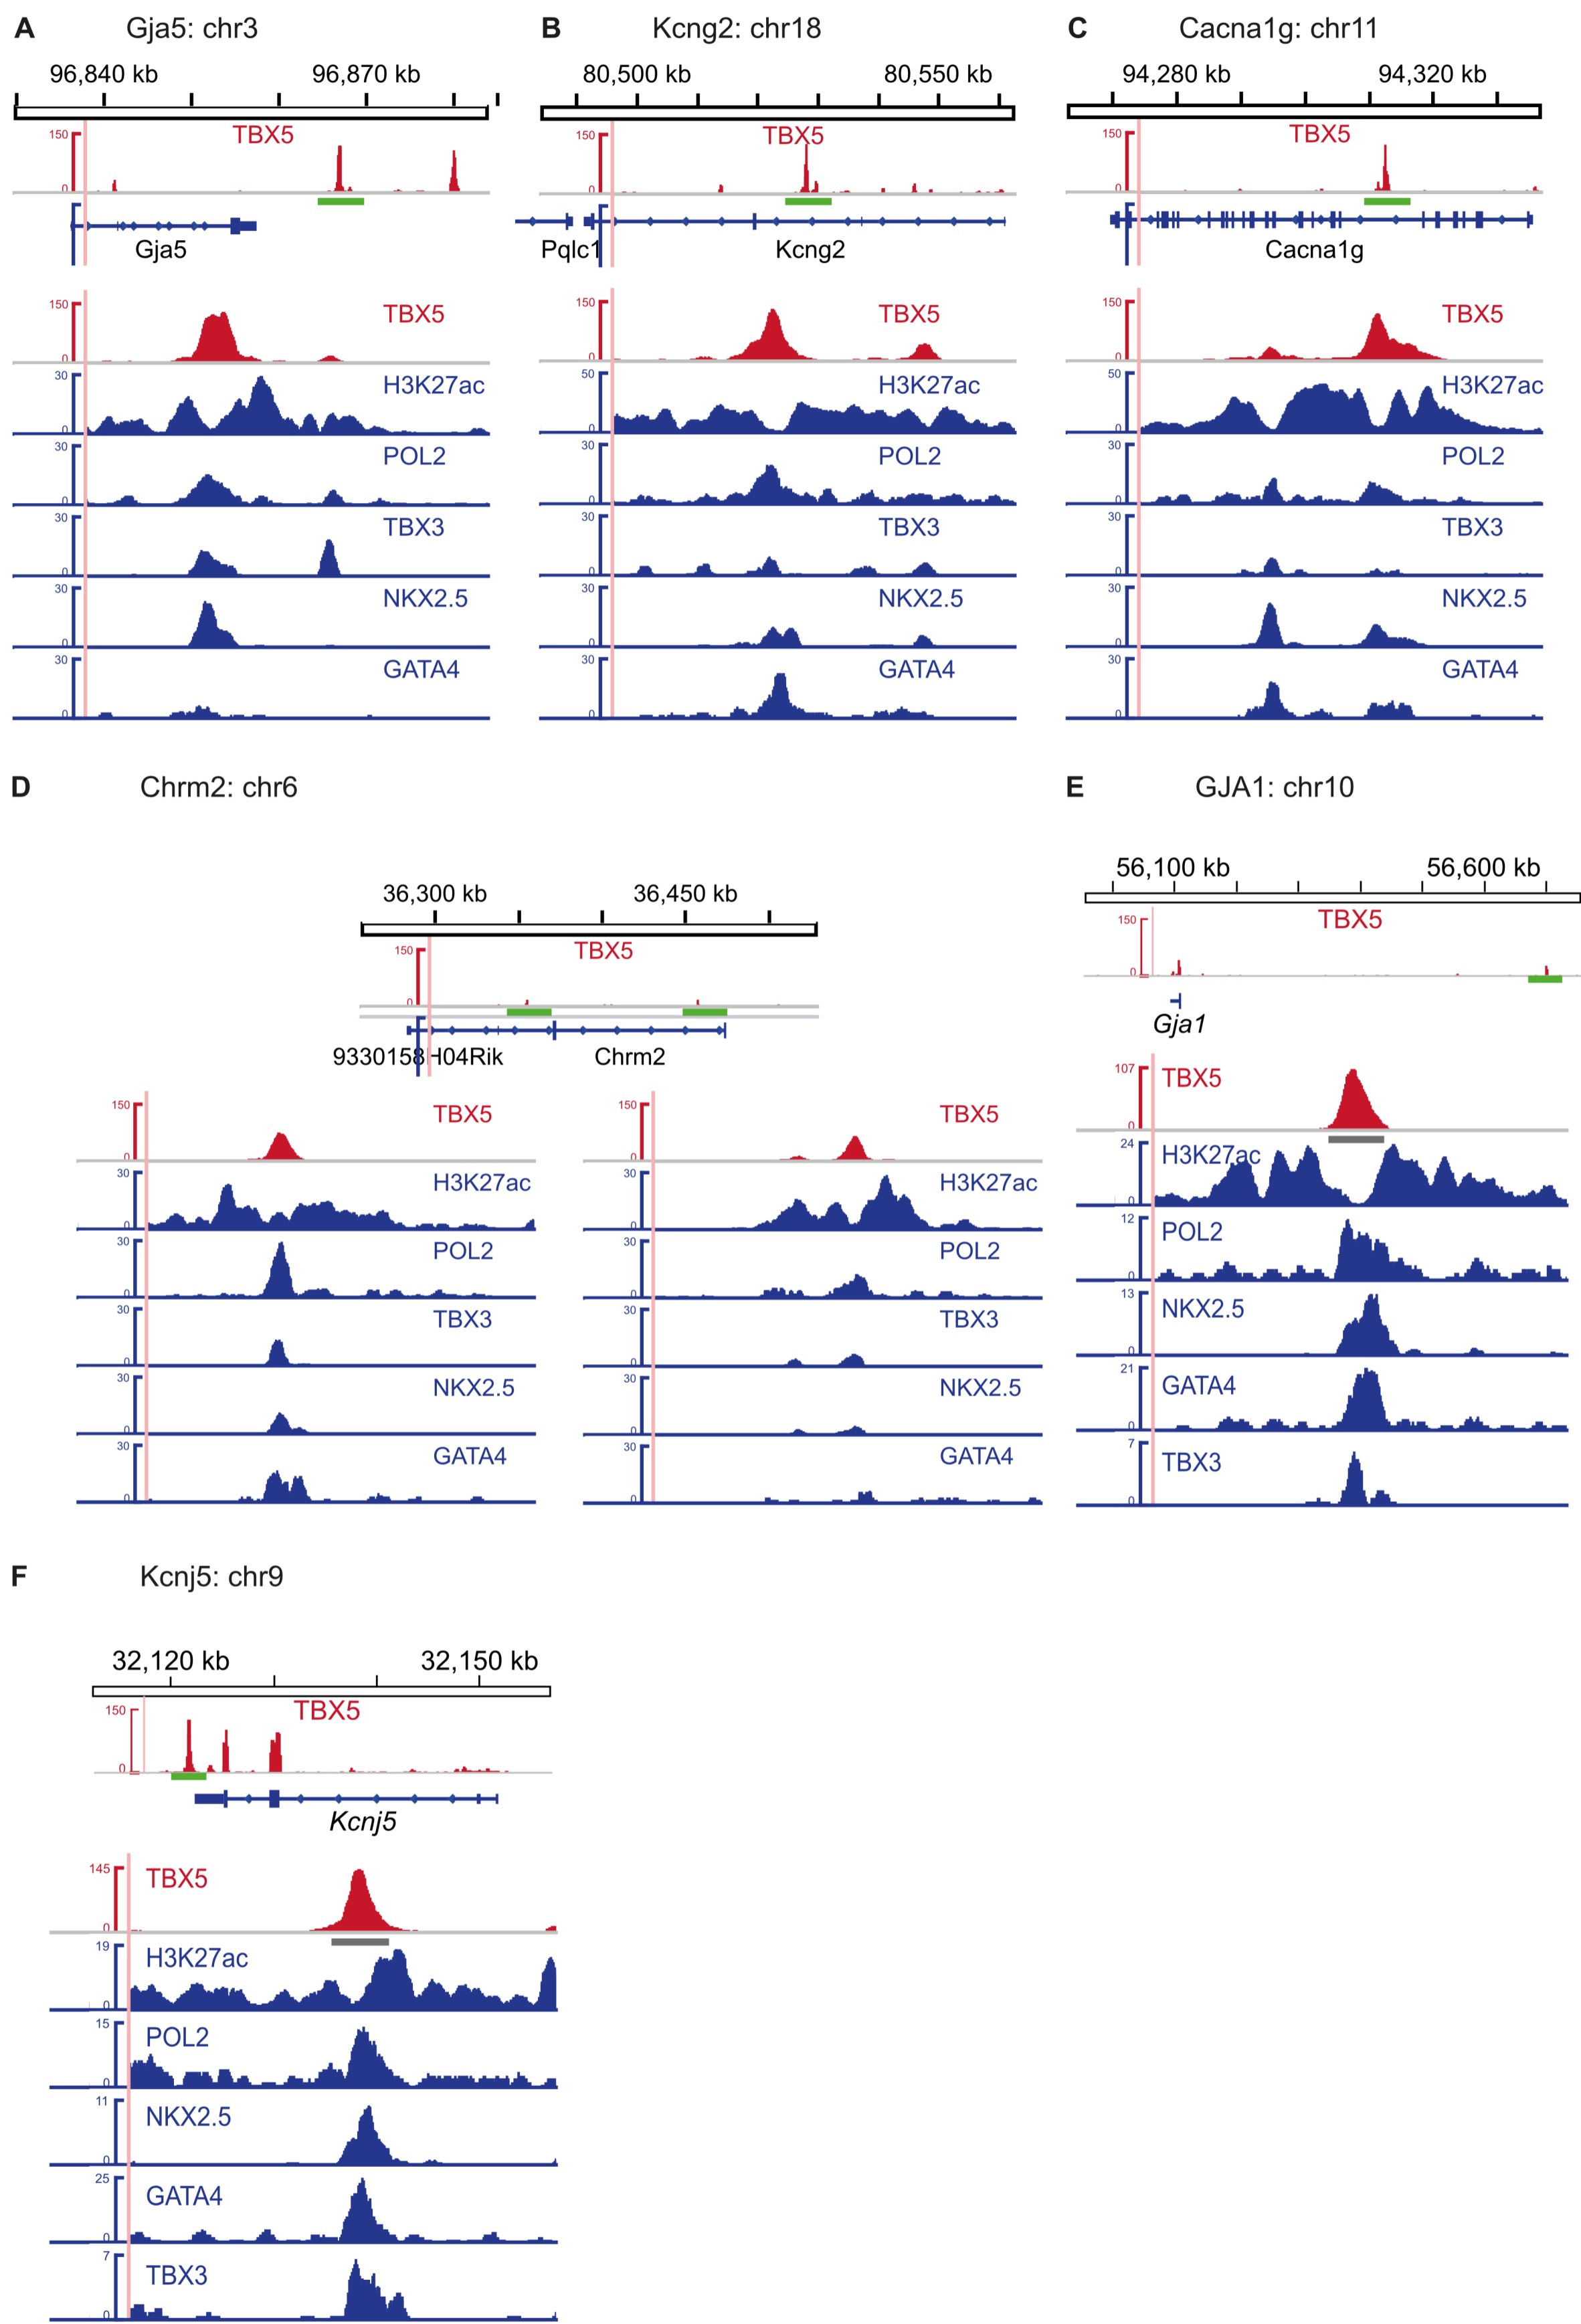

Figure S6

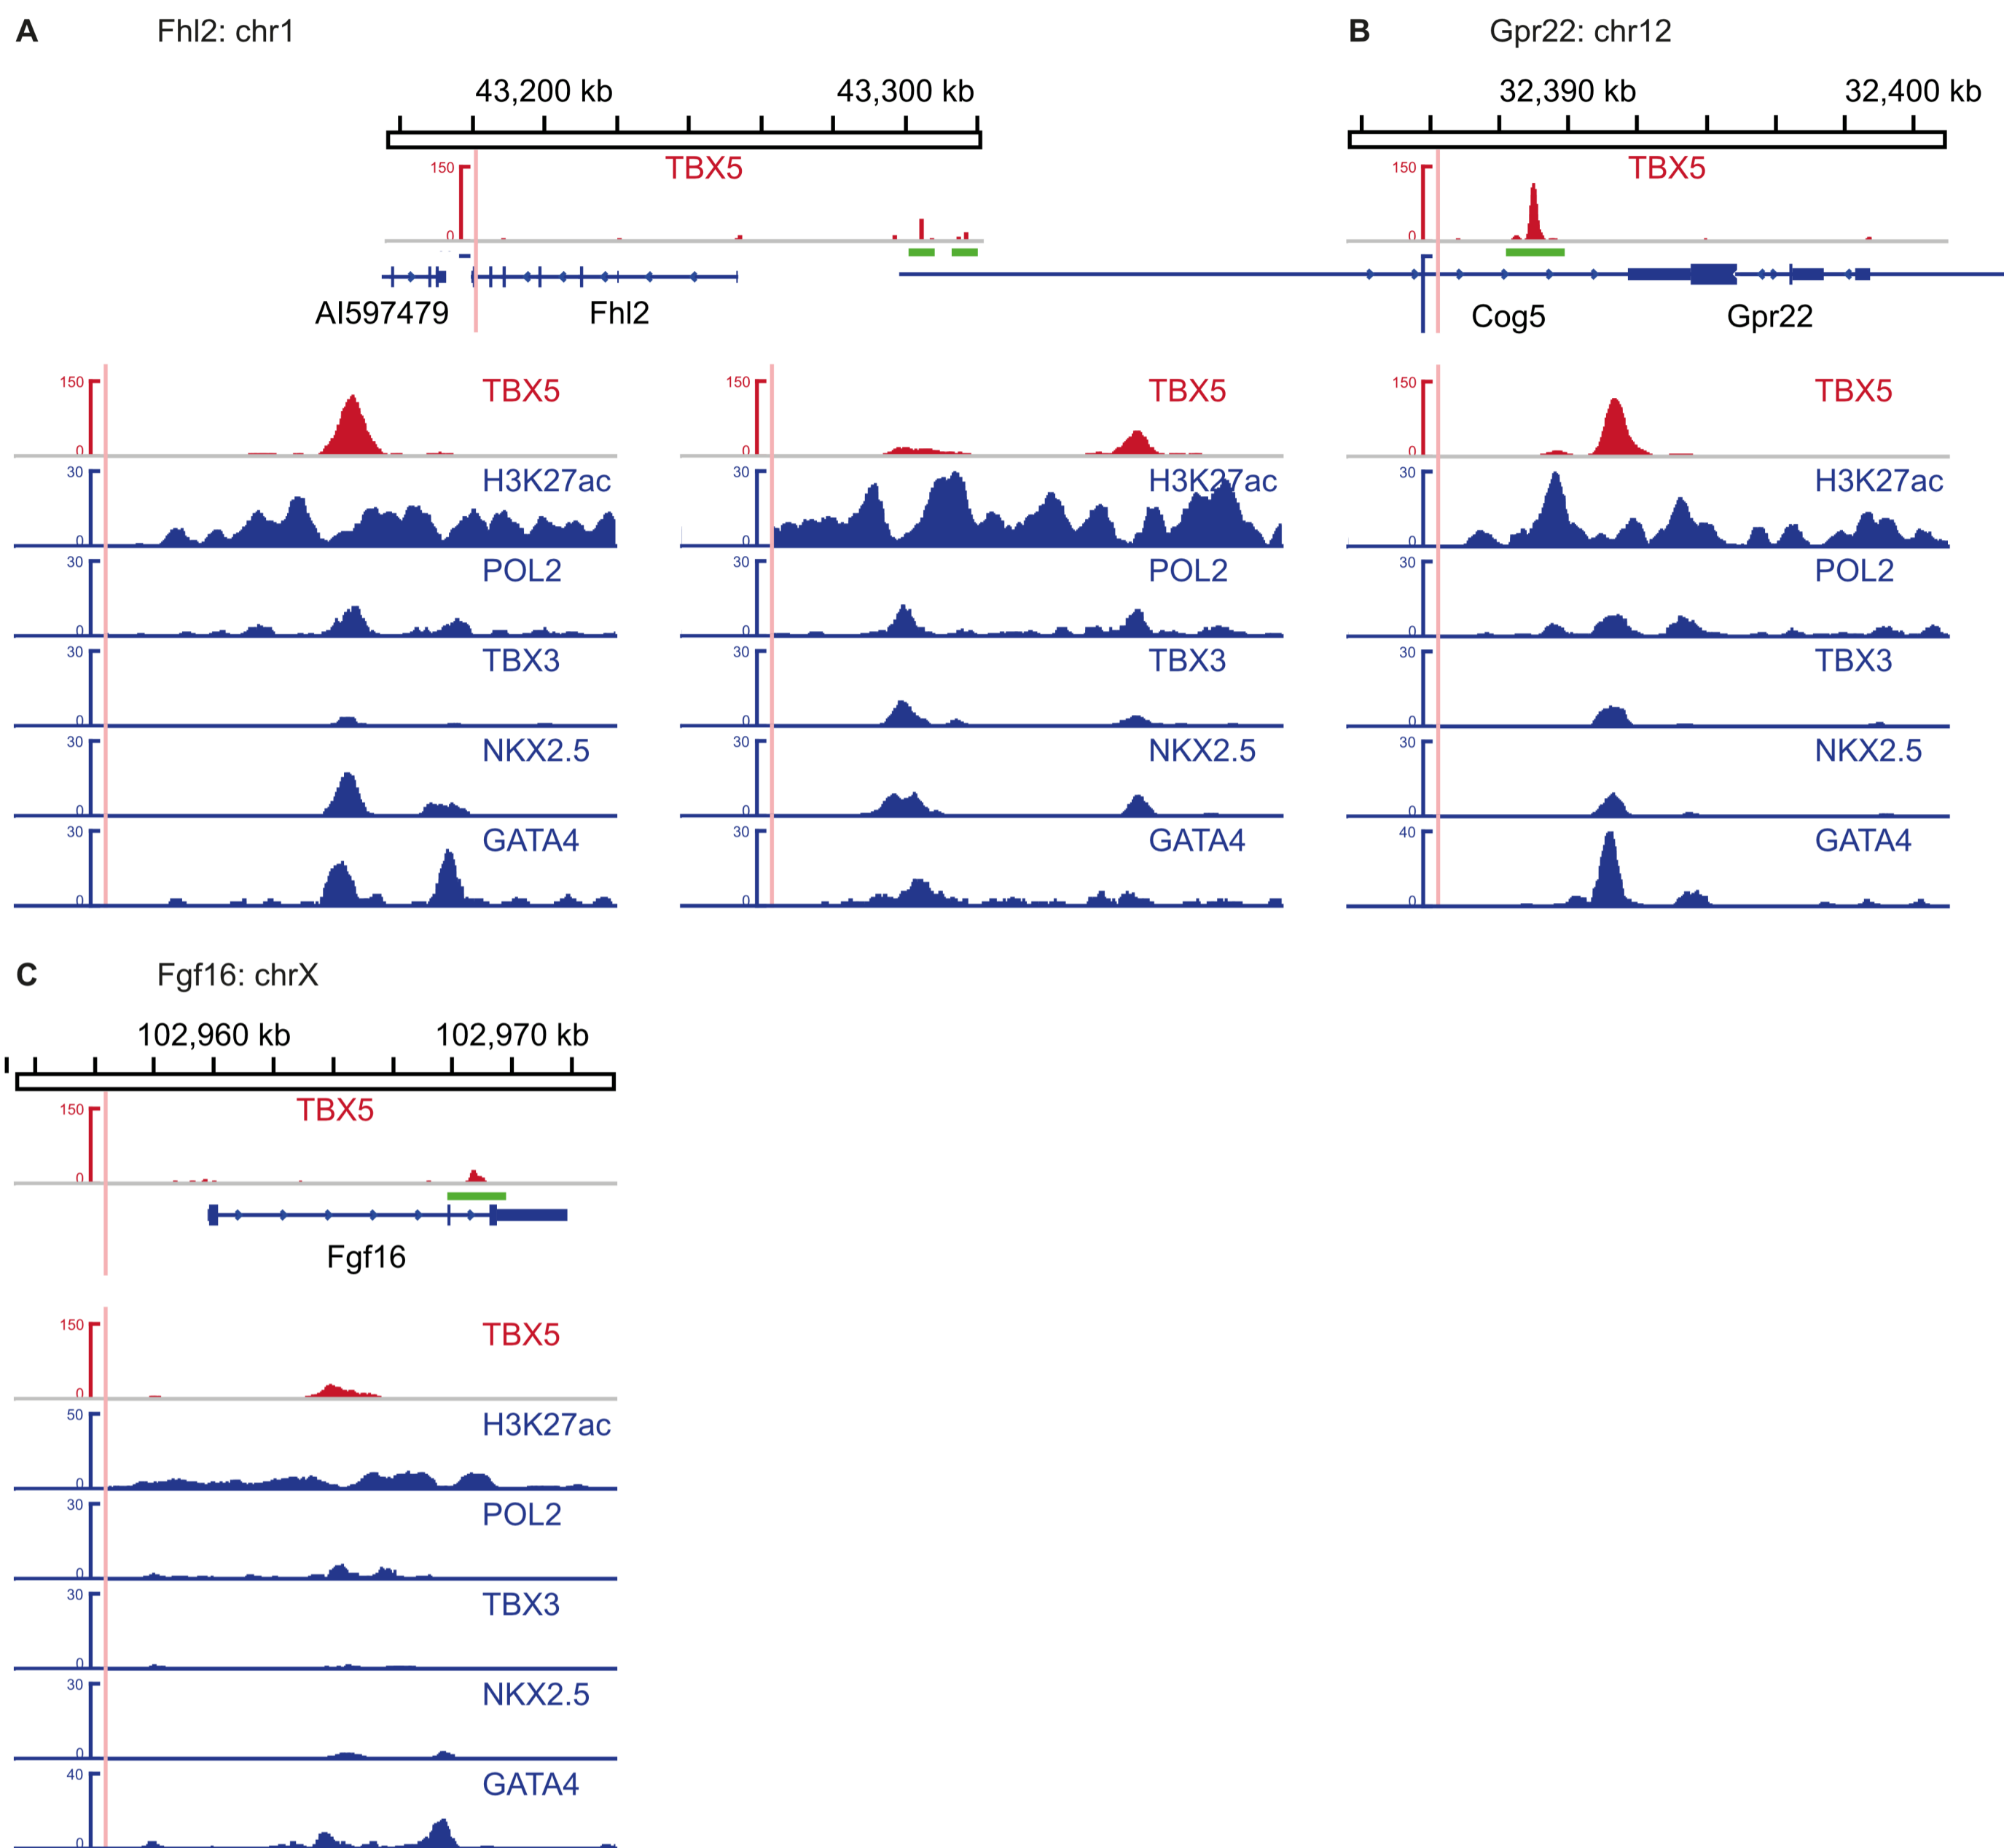

Figure S7

**A** Emilin2: chr17

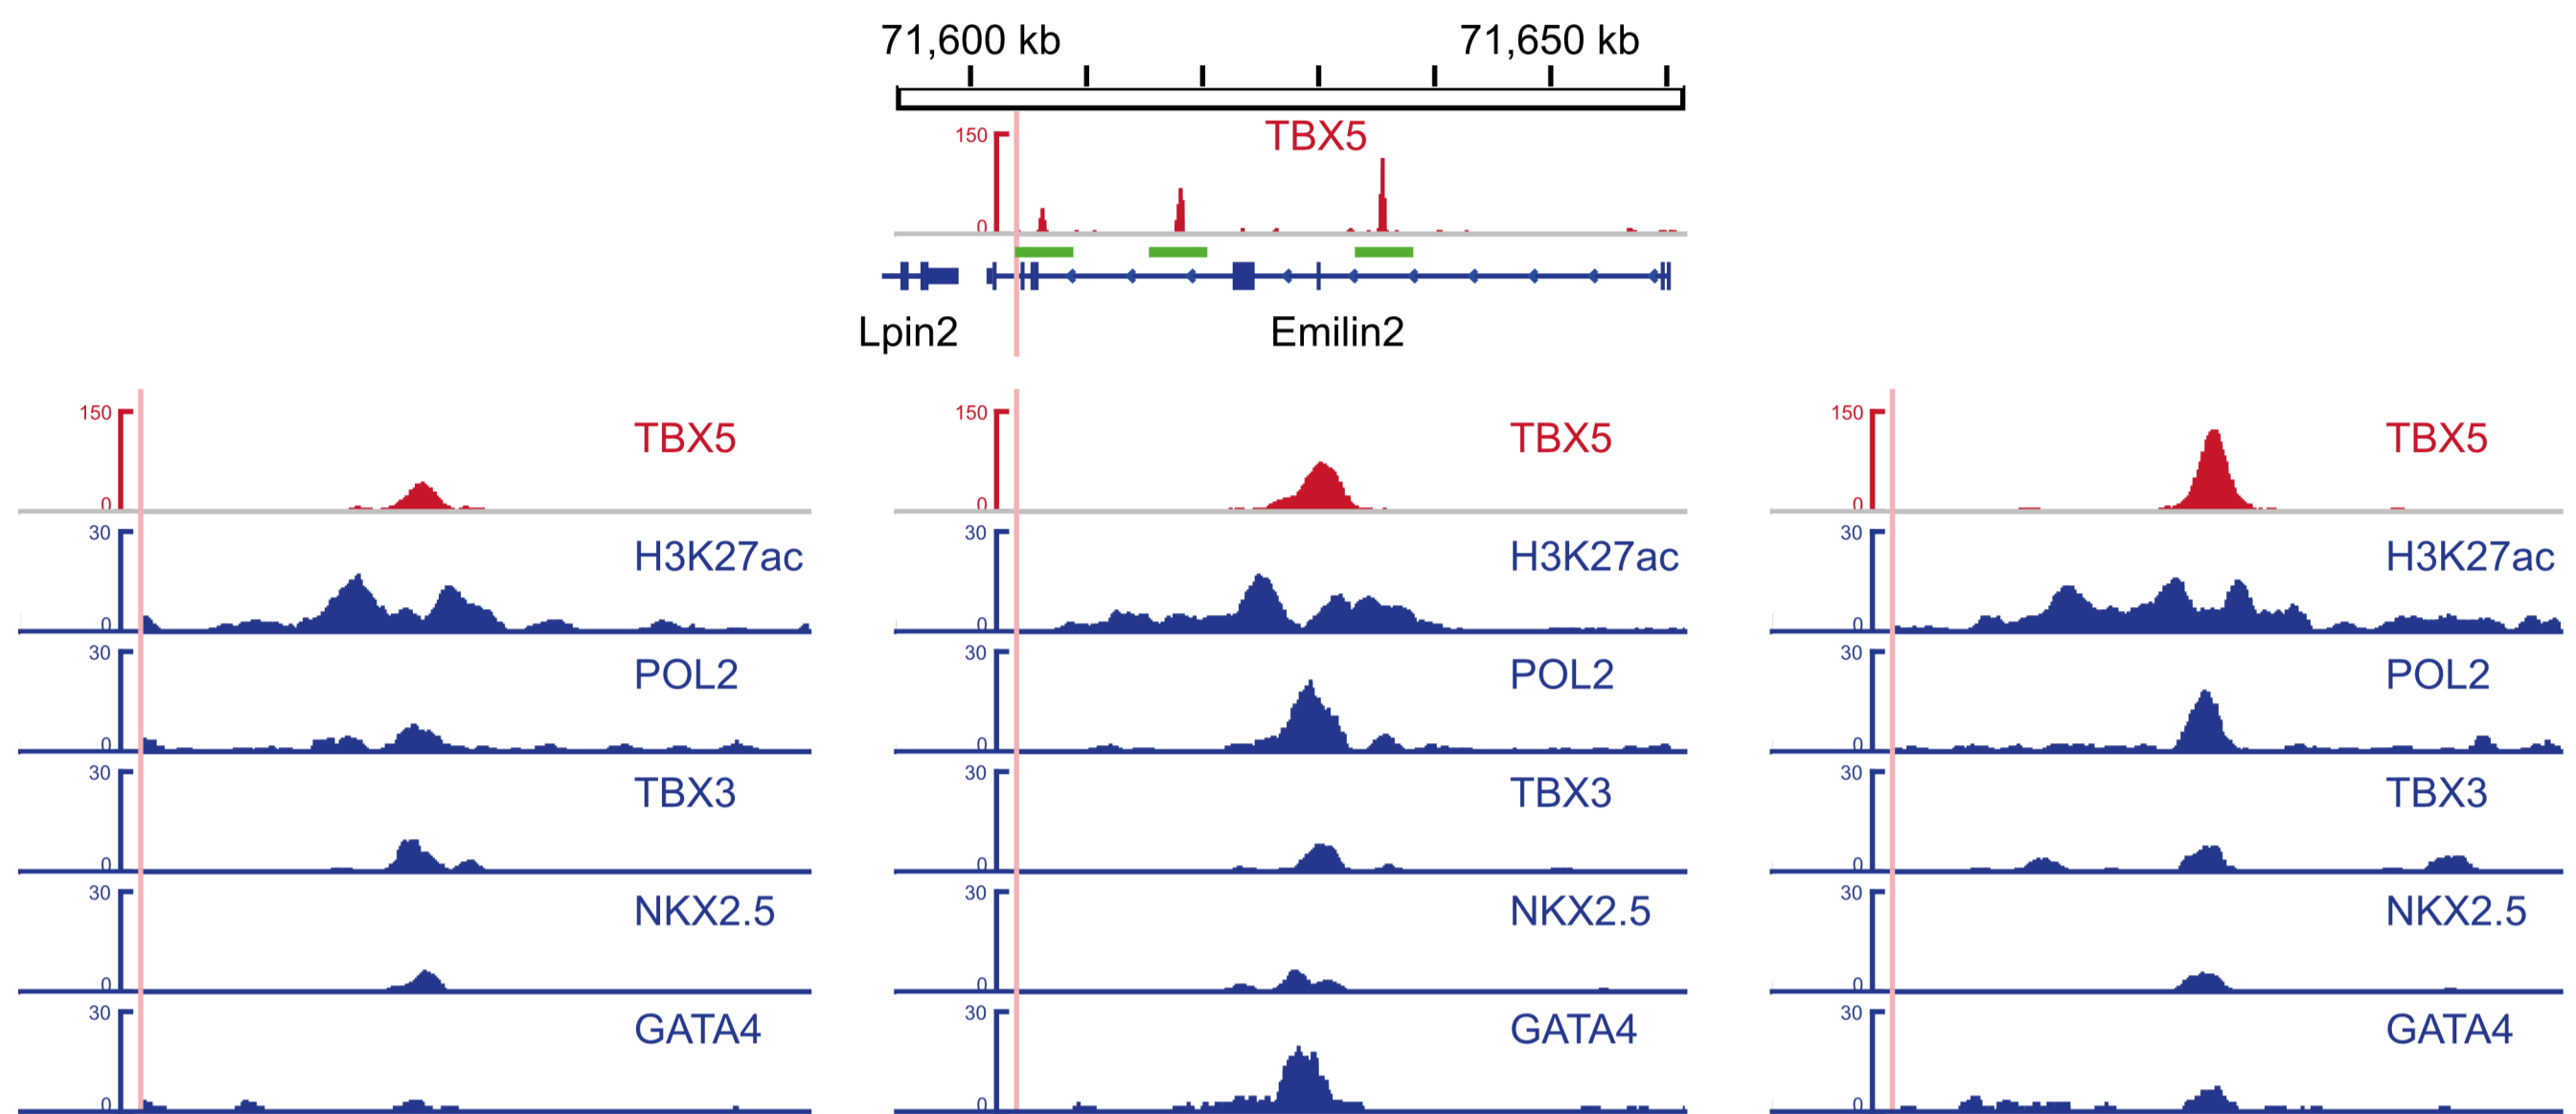

**B** Pdim4: chr11

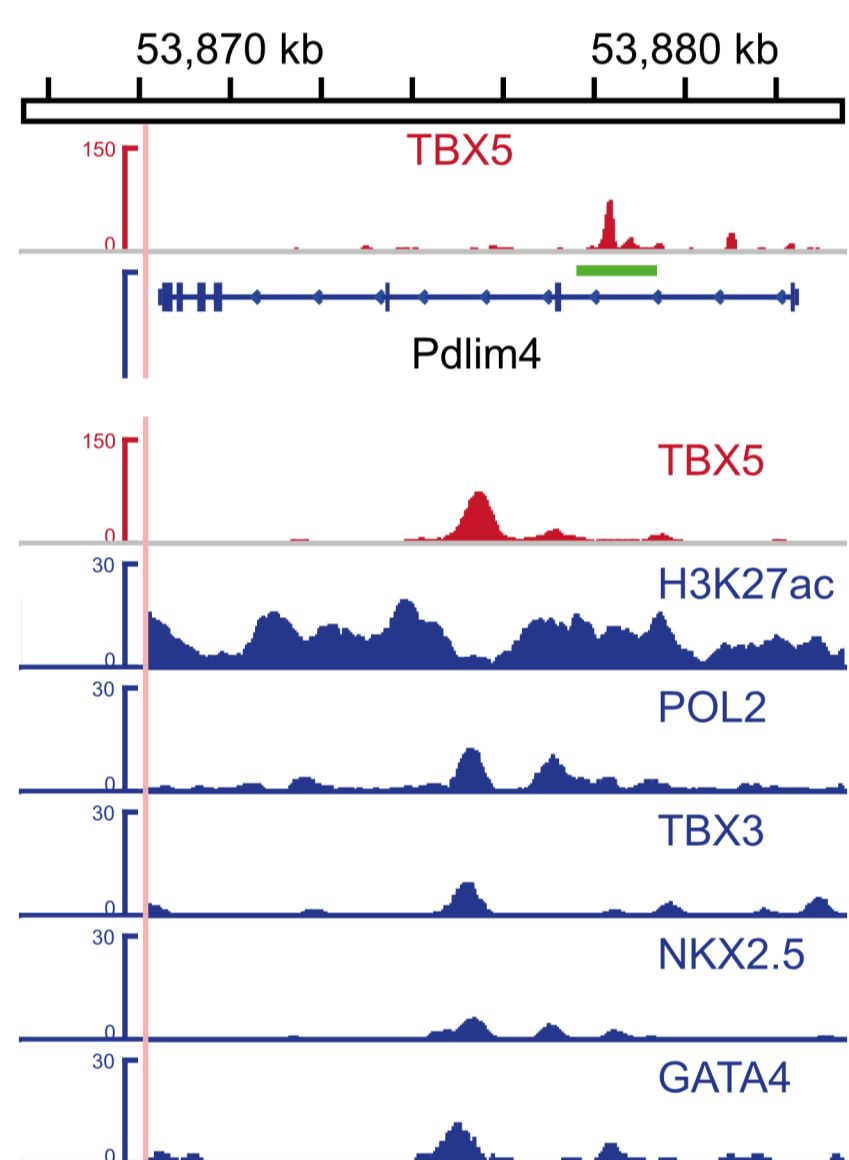

**D** Fstl4: chr11

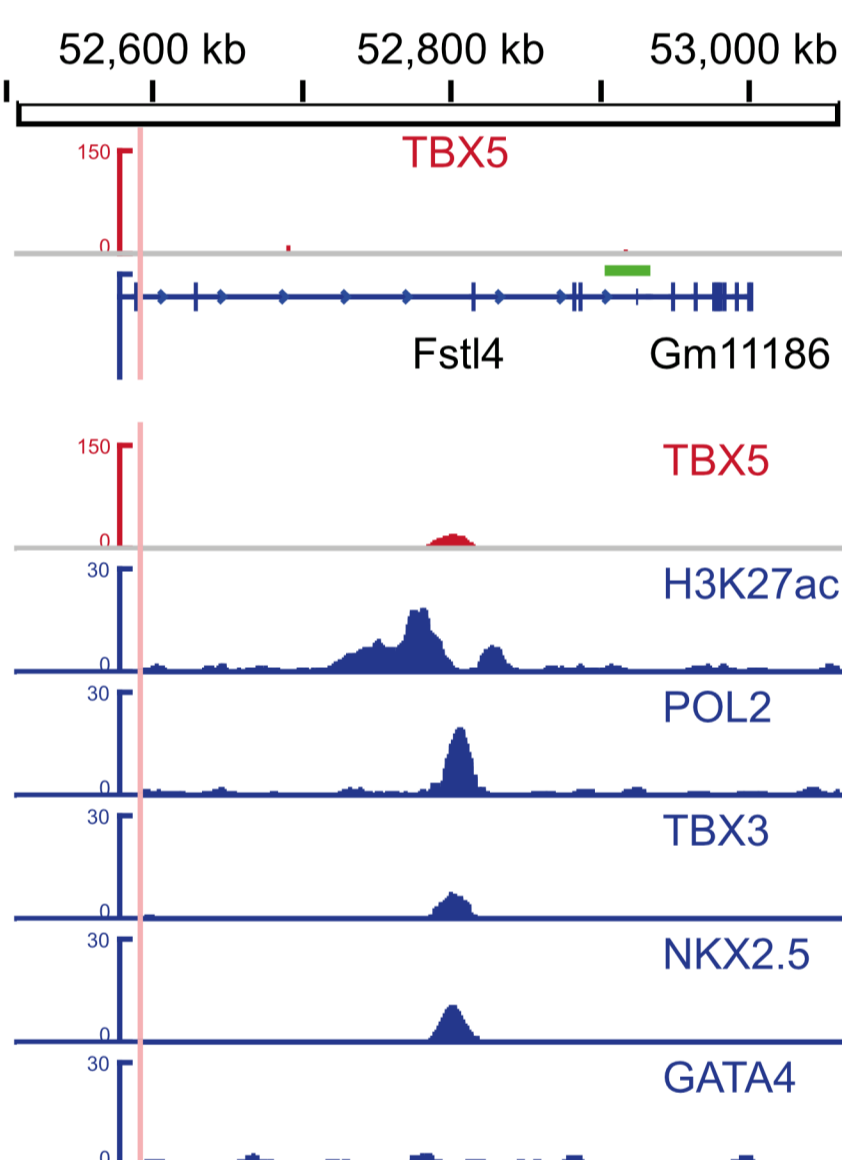

**E** Cmya5: chr13

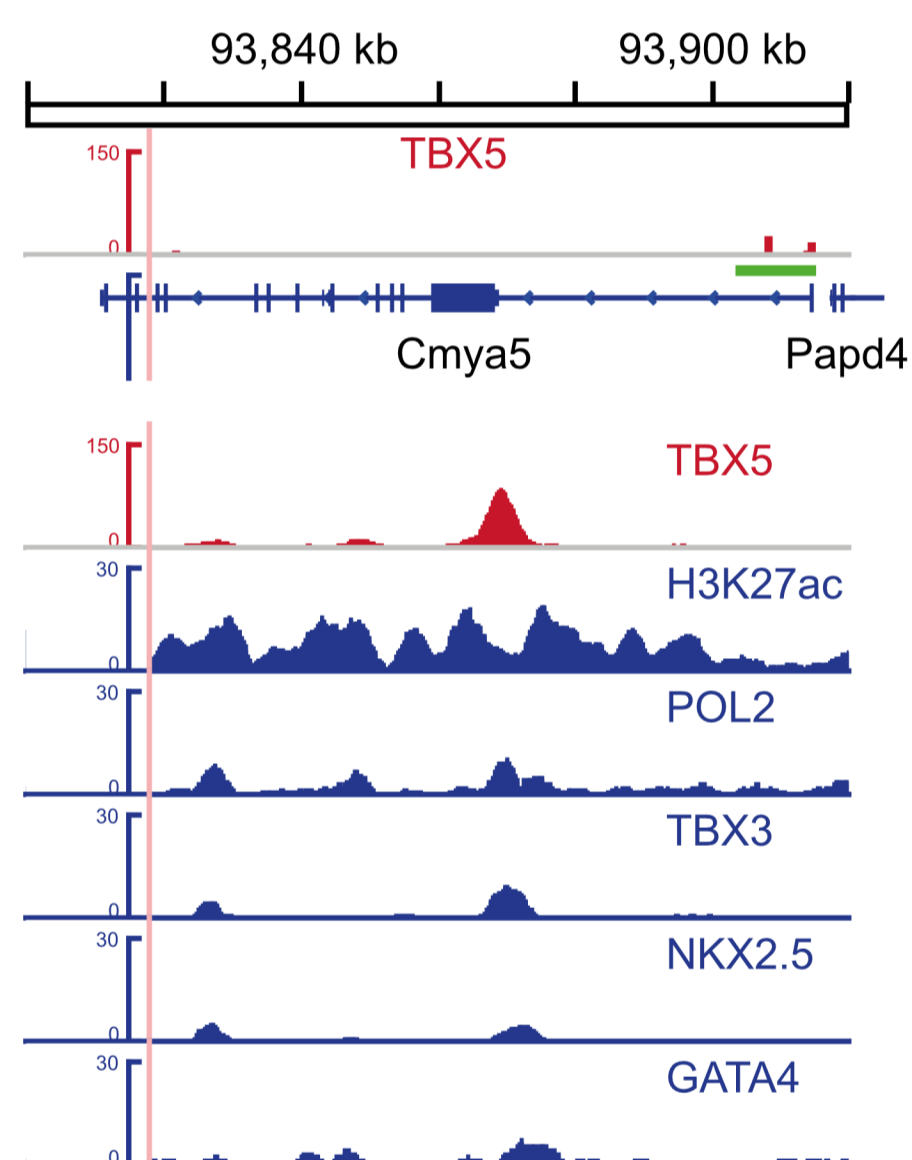

Figure S8

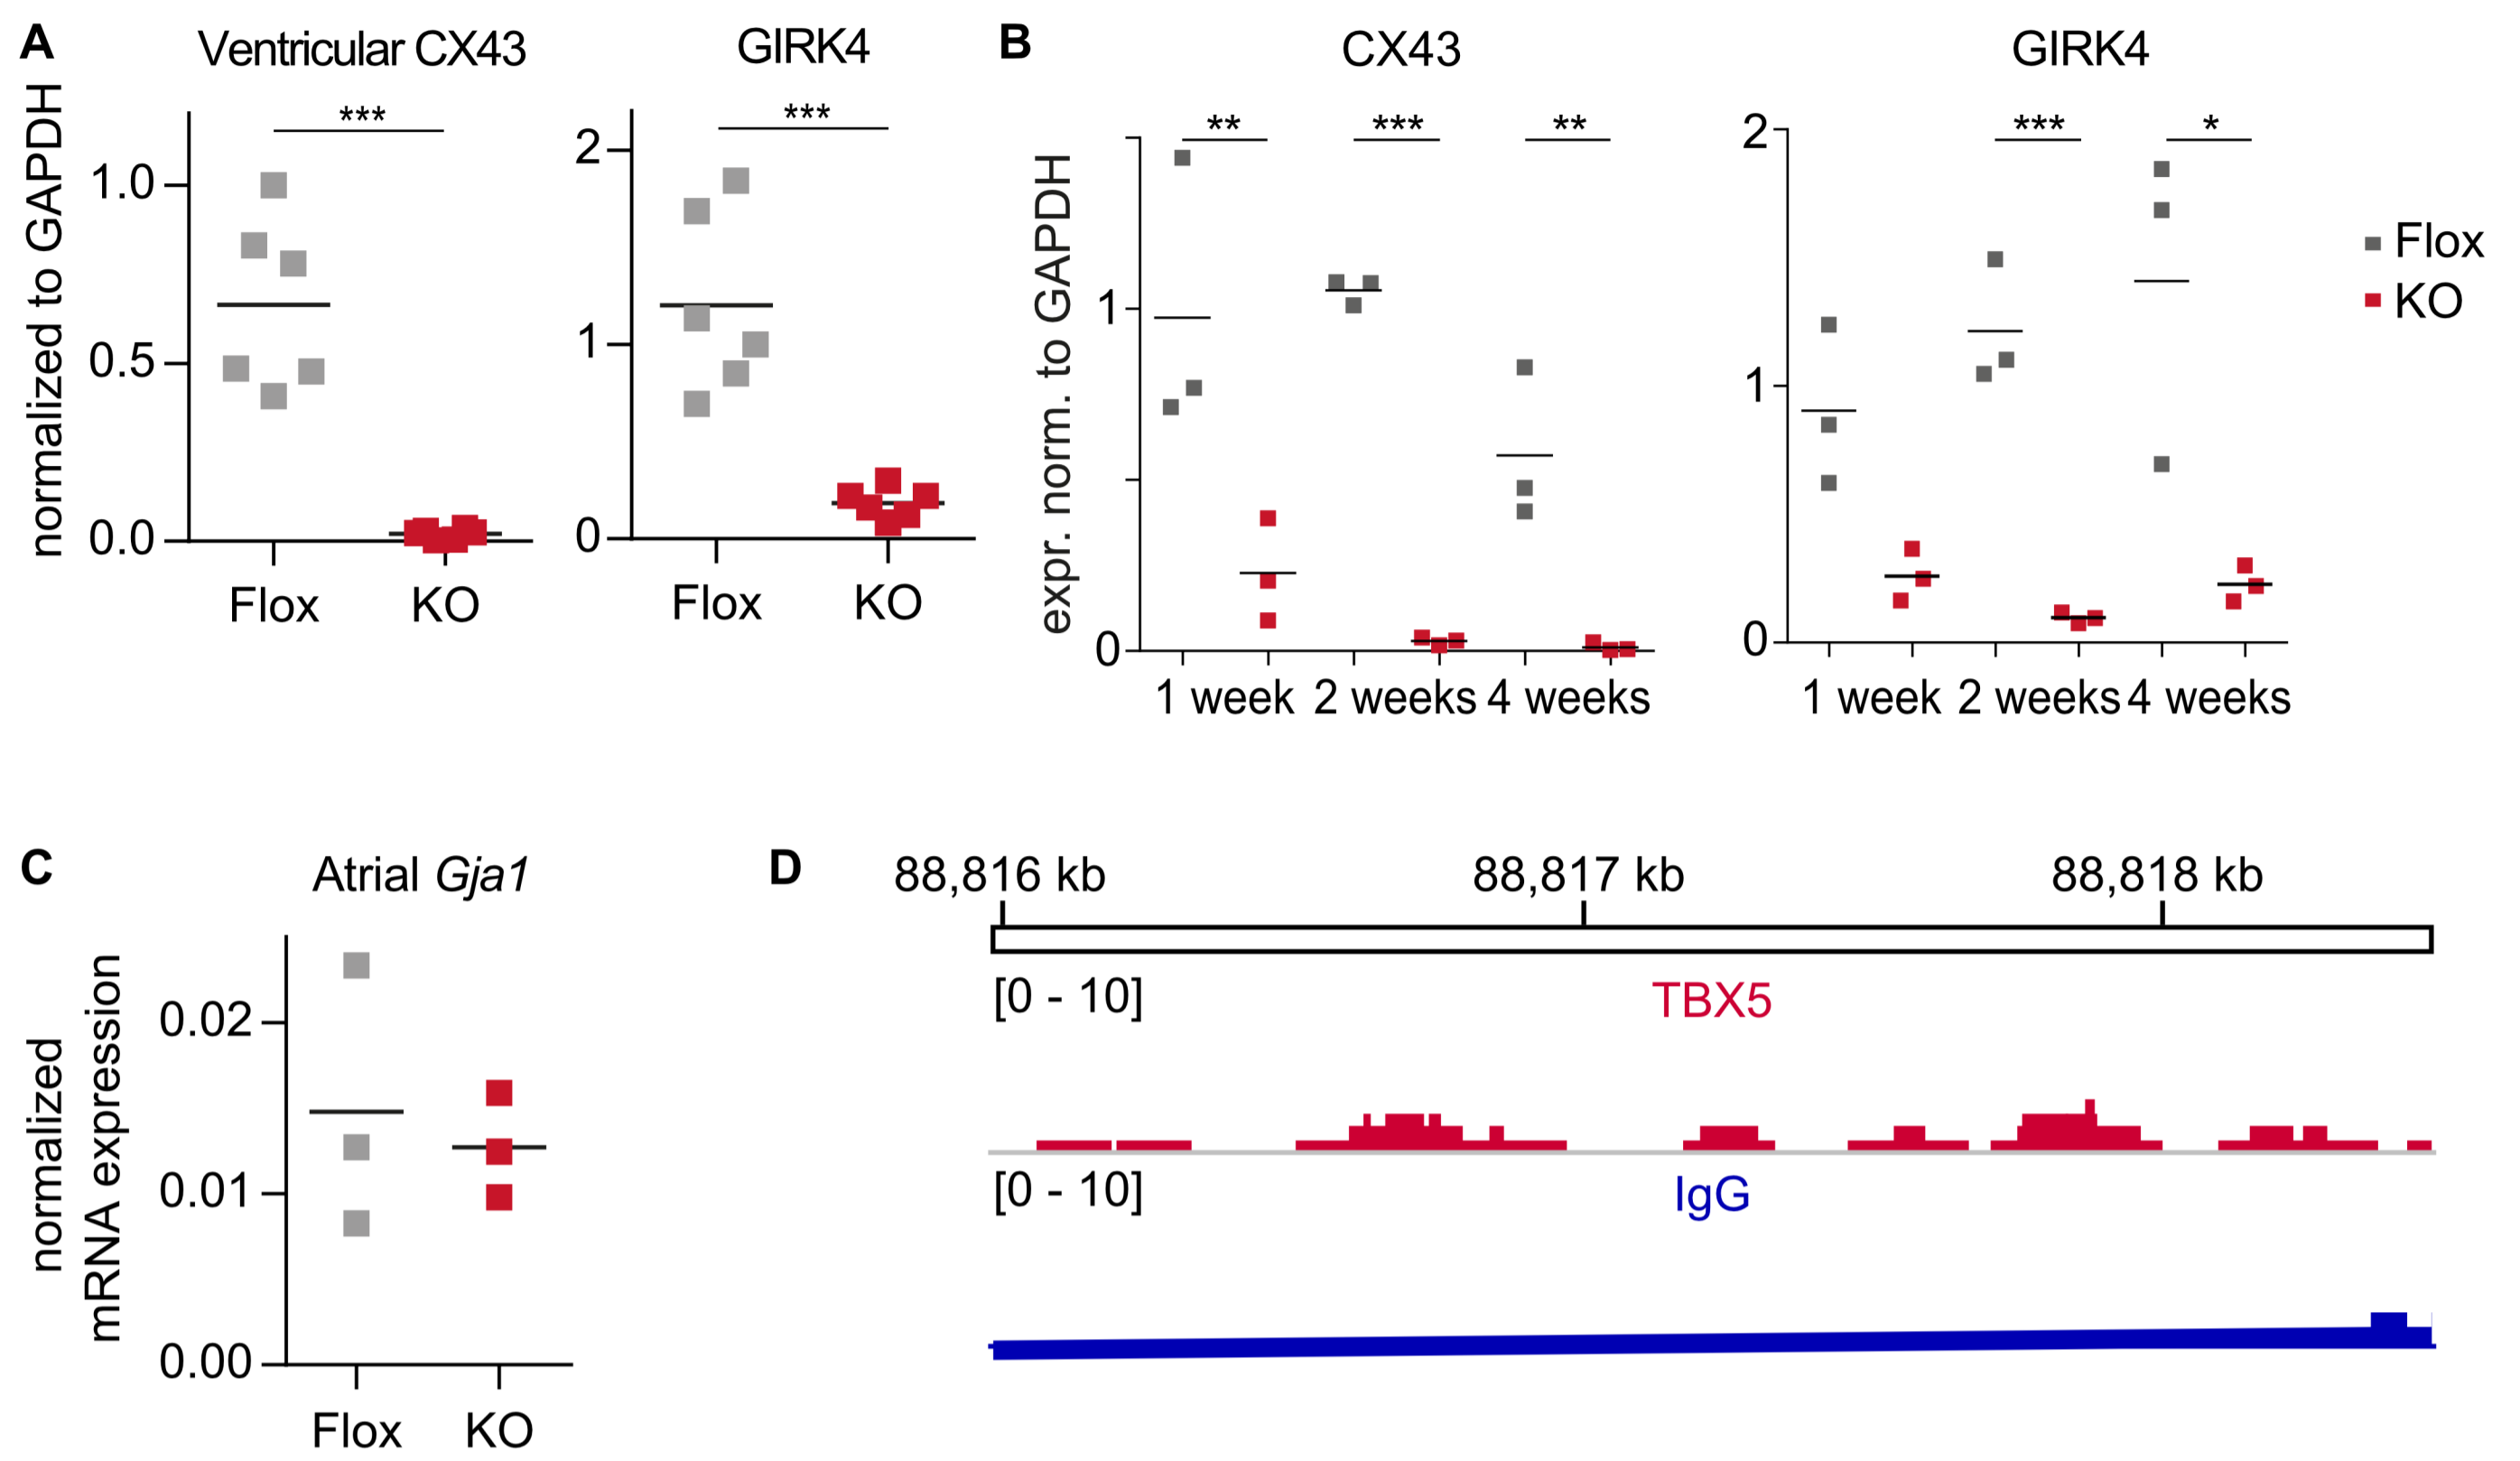

Figure S9

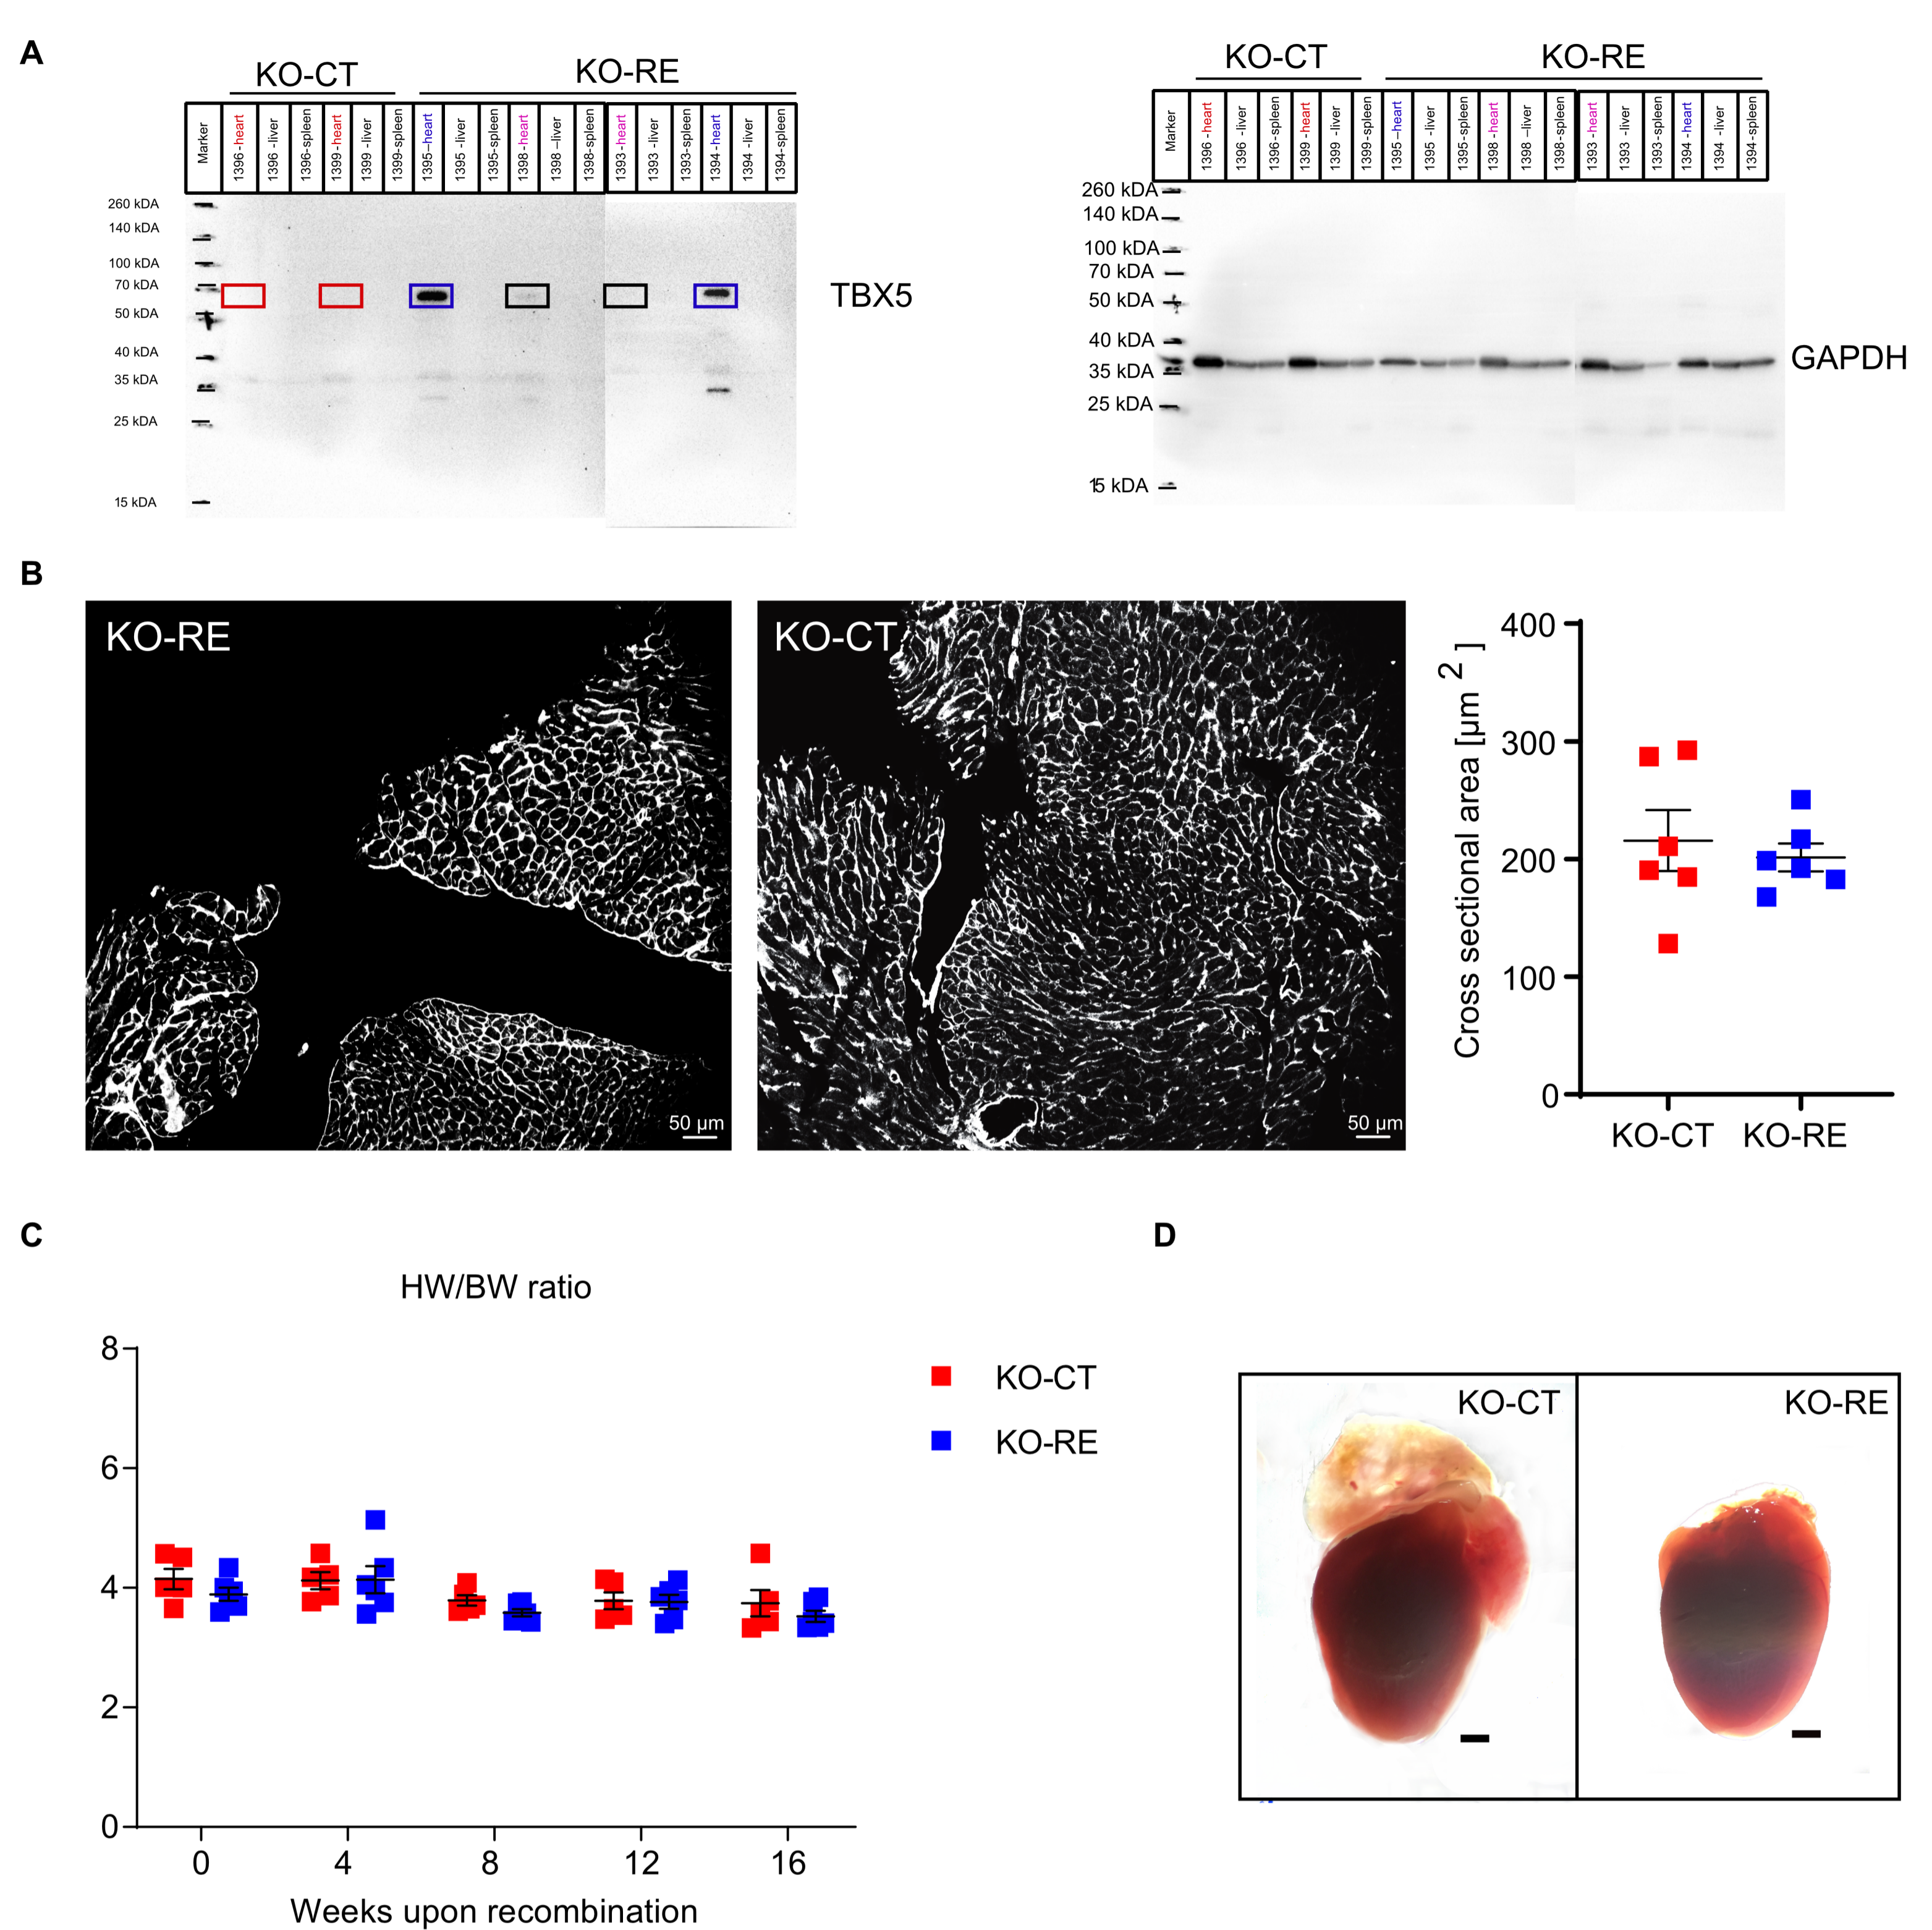

Figure S10

**A**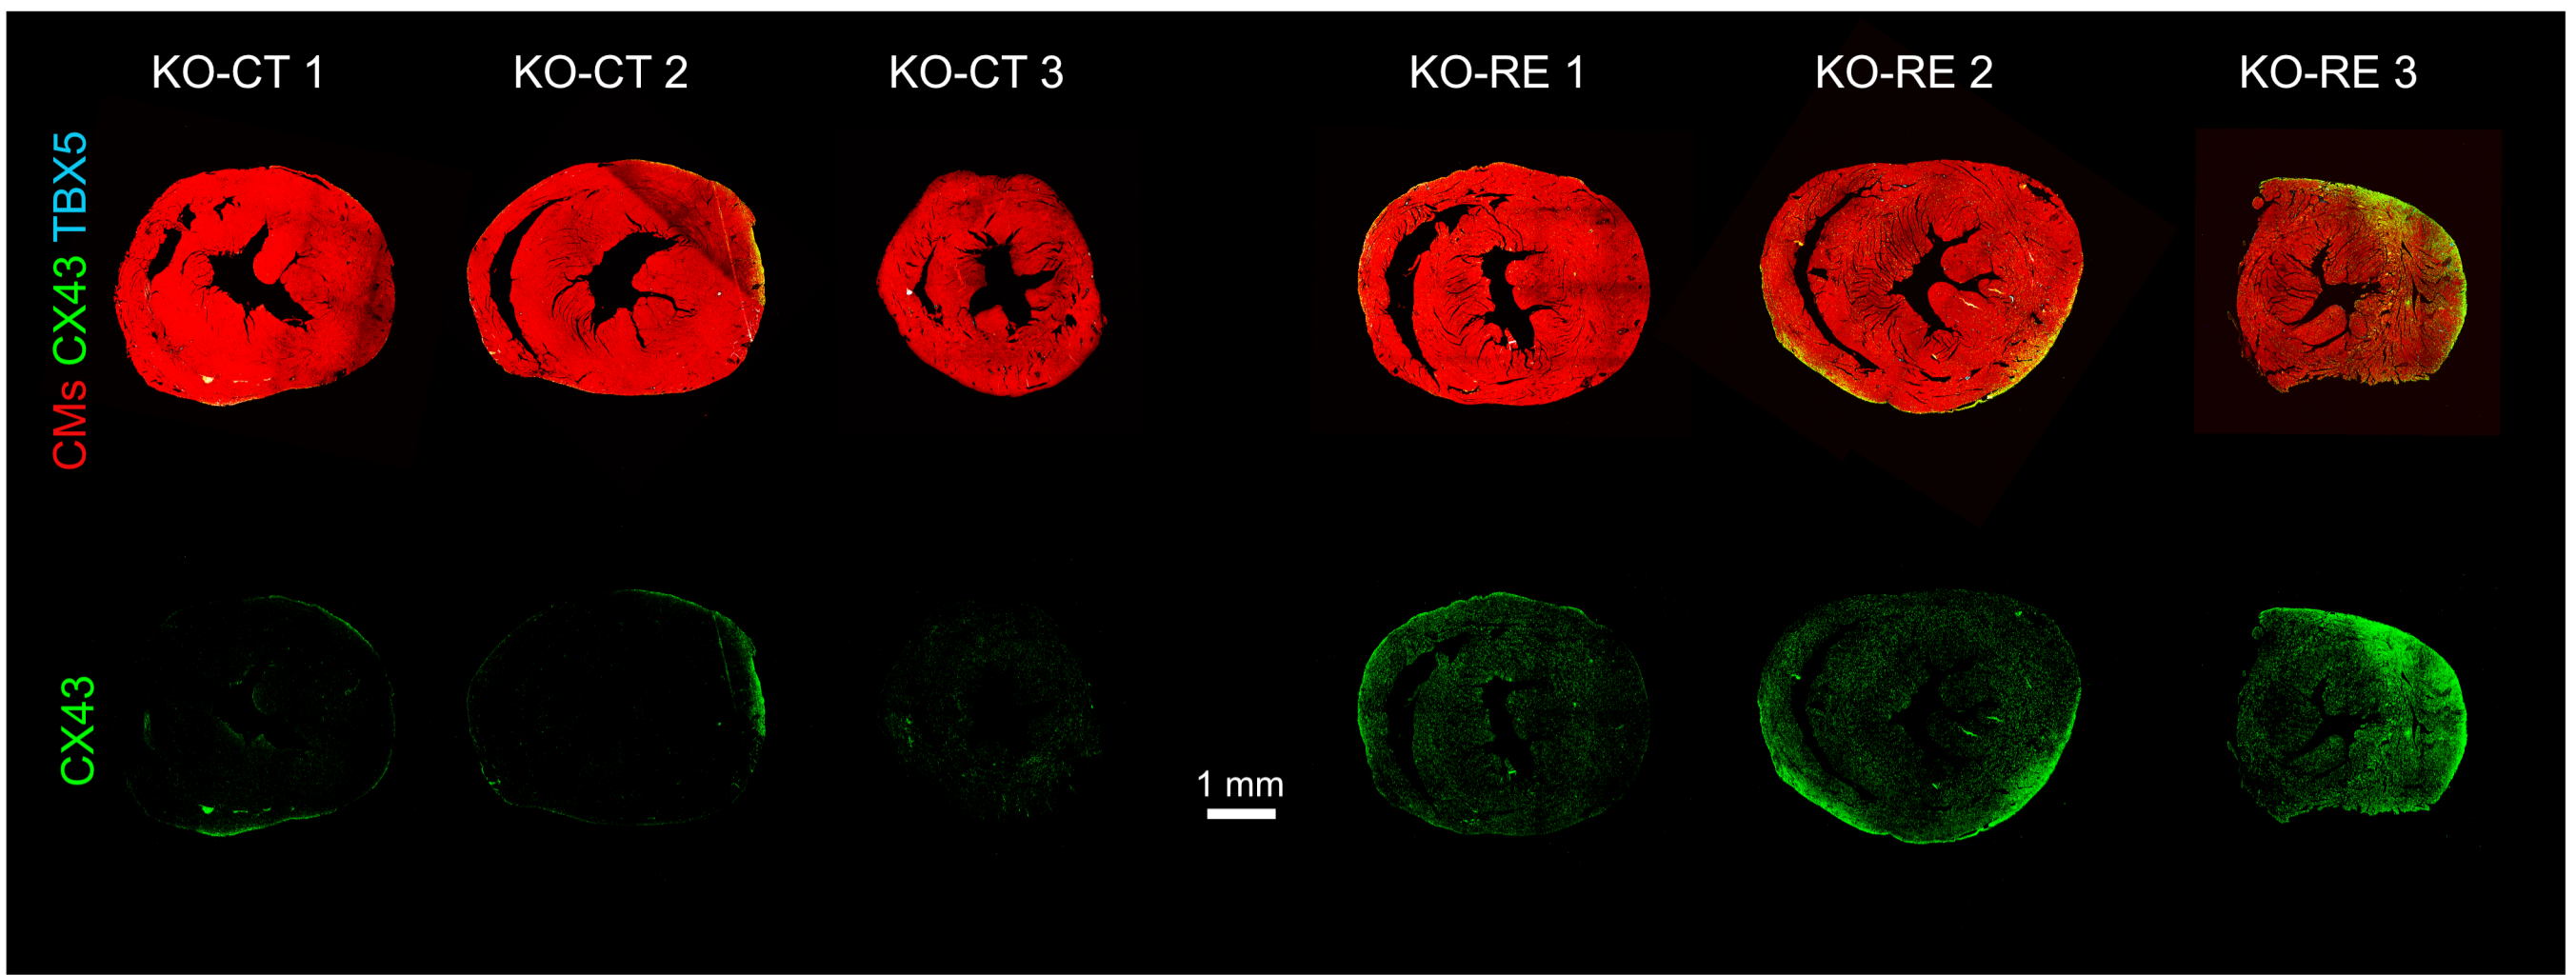**B**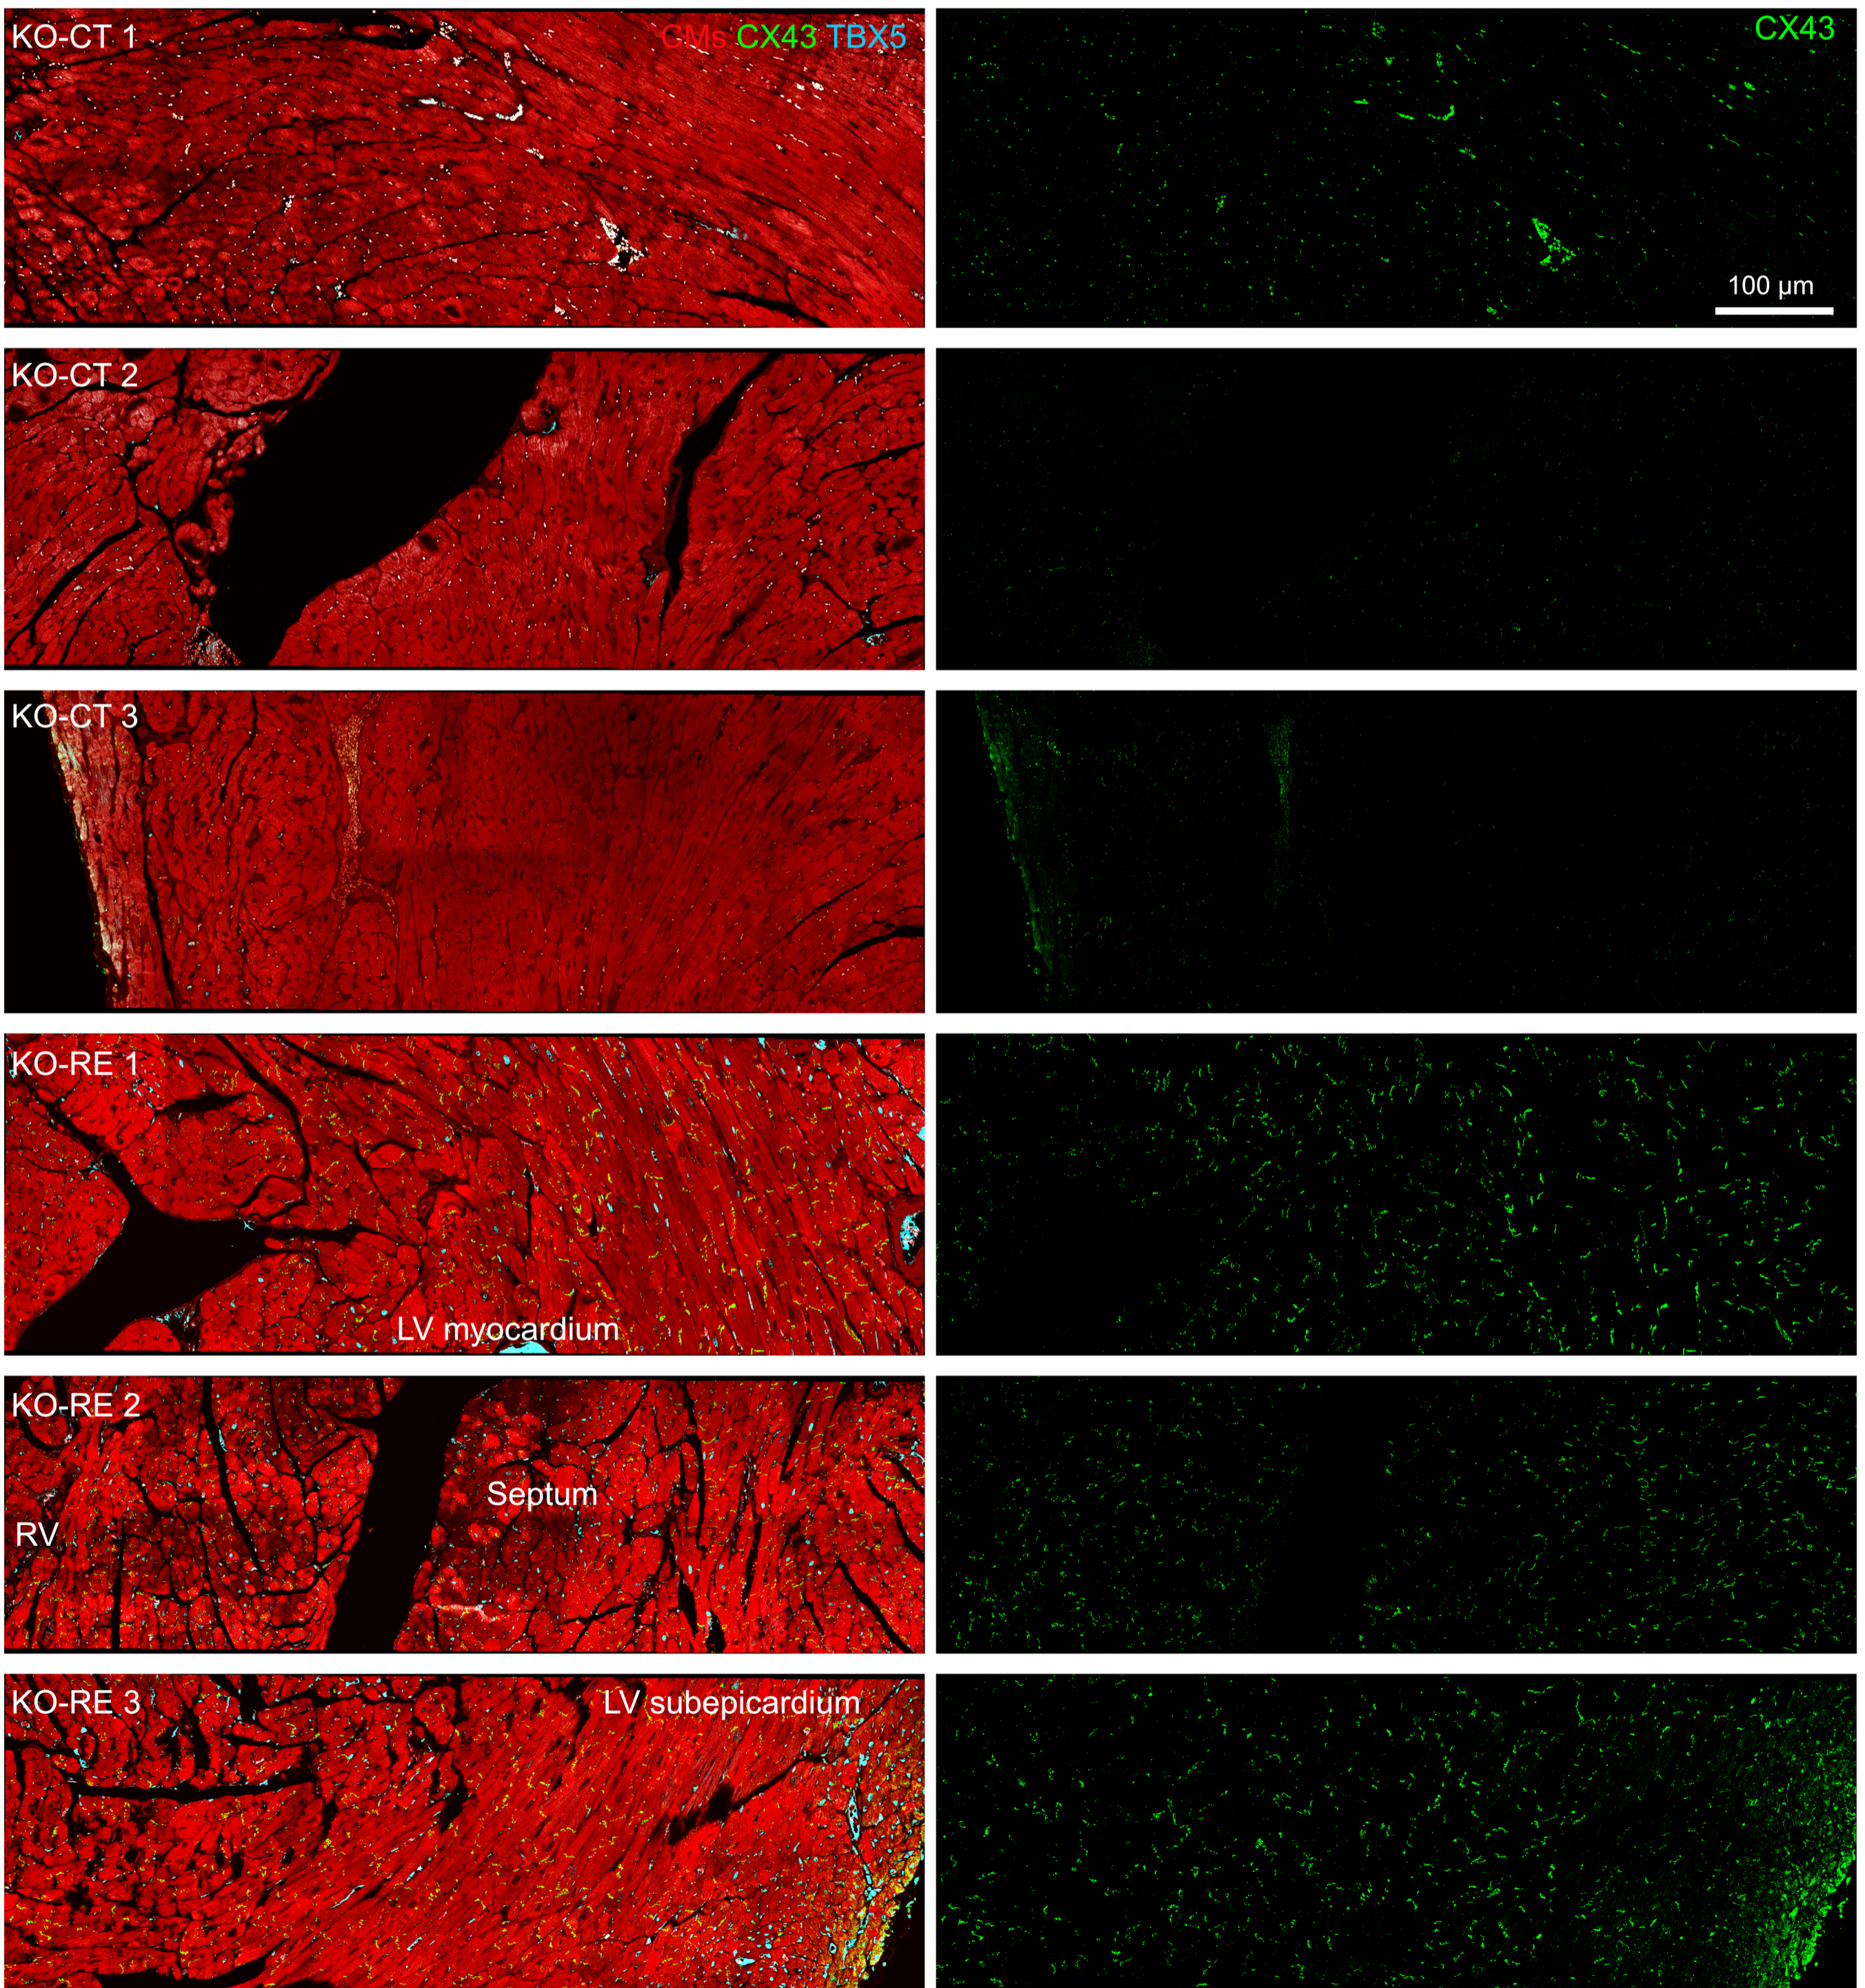

Figure S11

full blots of Figure 1

TBX5

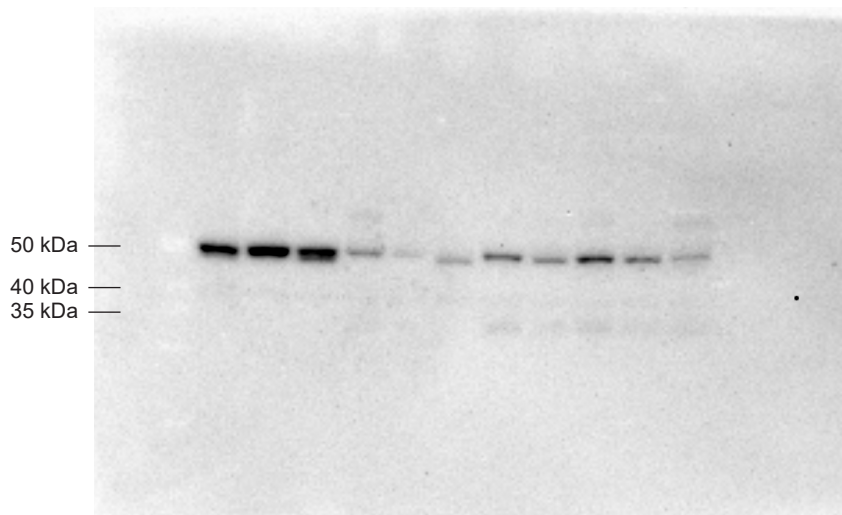

CASQ2

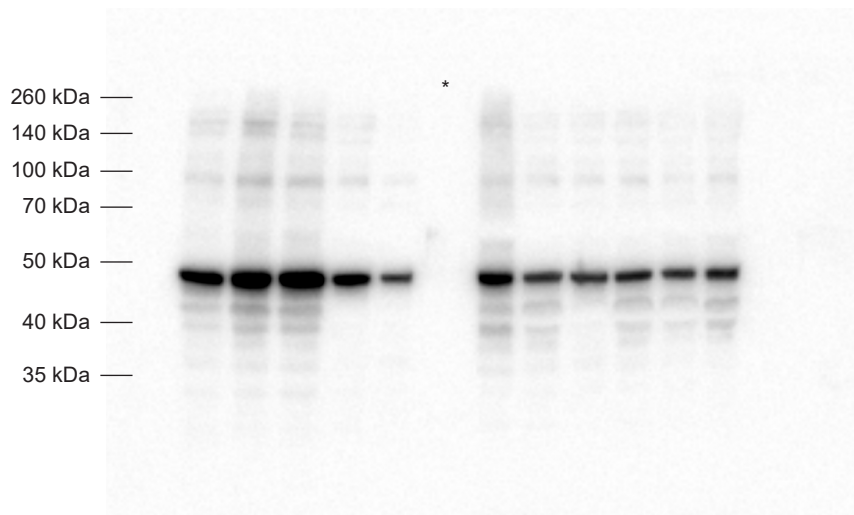

\* empty lane

GAPDH

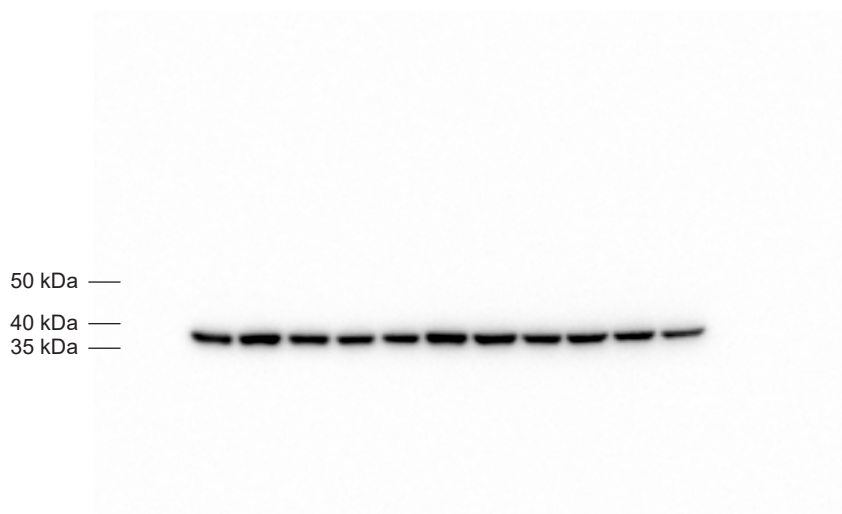

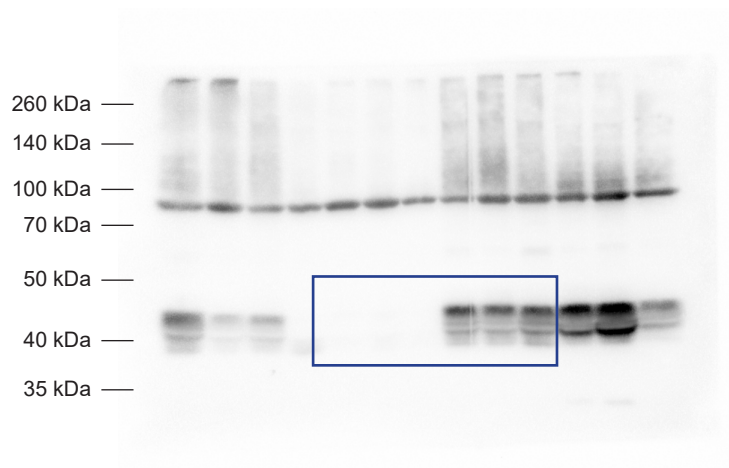

GAPDH

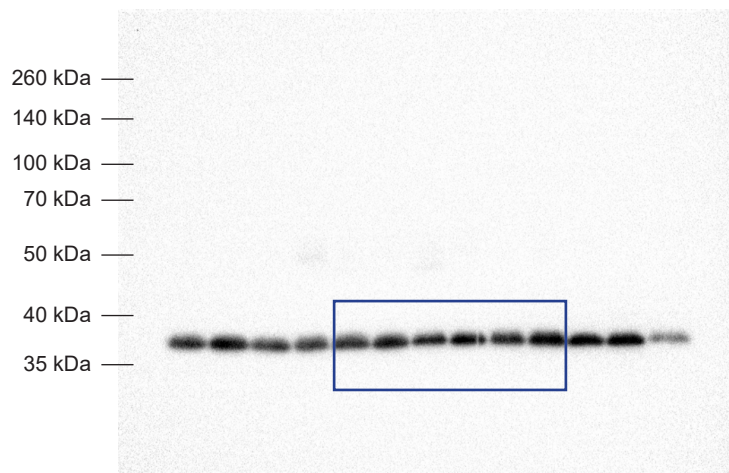

GIRK4

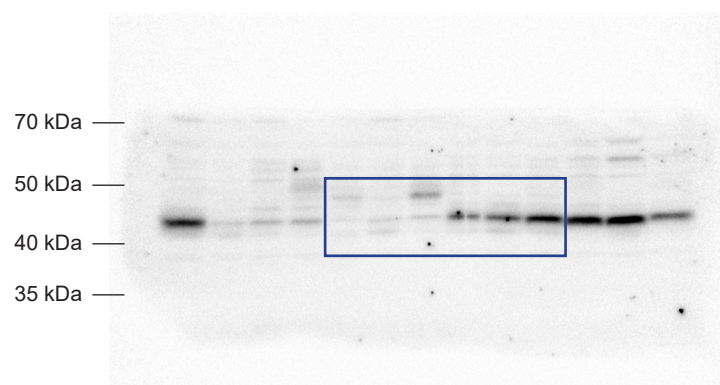

GAPDH

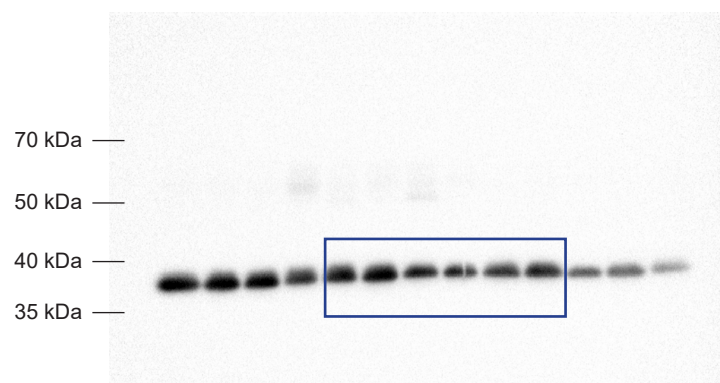



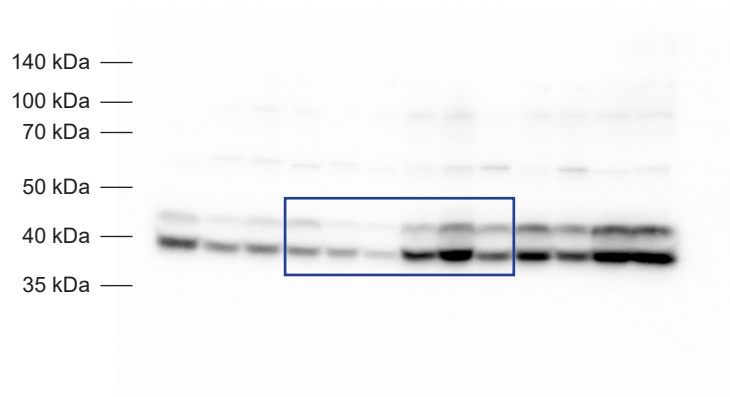

GAPDH

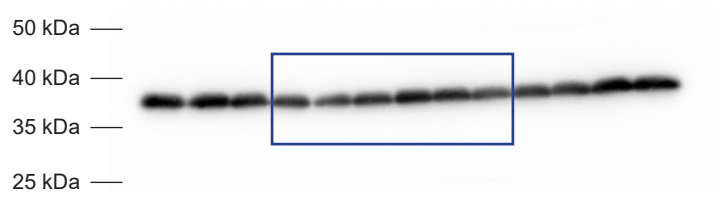

FHL2

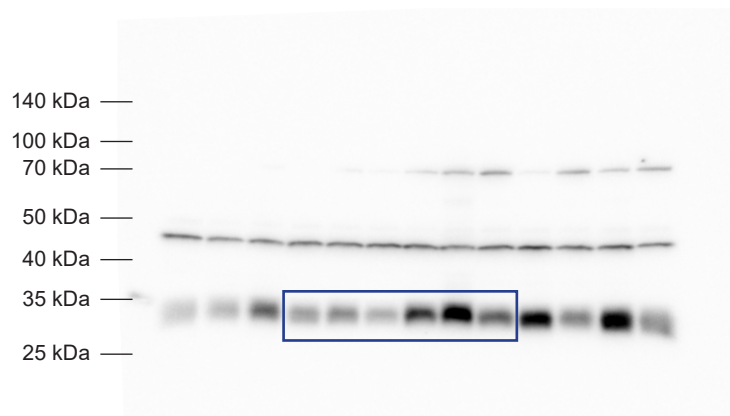

Upregulated genes in  
vTBX5KO ventricles  
Log2foldchange >0.8

| ensembl_gene_id     | external_gene_id     | description                                                                                                               | entrezgene | chromosome_name | start_position | end_position | length | baseMean | log2FoldChange | padj     |
|---------------------|----------------------|---------------------------------------------------------------------------------------------------------------------------|------------|-----------------|----------------|--------------|--------|----------|----------------|----------|
| ENSMUSG00000072324  | <b>Gm8420</b>        | predicted gene 8420 [Source:MGI Symbol;Acc:MGI:3645594]                                                                   |            | 1               | 51940650       | 51941261     | 612    | 42.59    | 3.15           | 4.73E-20 |
| ENSMUSG00000034028  | <b>Cd226</b>         | CD226 antigen [Source:MGI Symbol;Acc:MGI:3039602]                                                                         | 225825     | 18              | 89197431       | 89270201     | 72771  | 60.66    | 1.93           | 1.17E-07 |
| ENSMUSG00000078307  | <b>Al593442</b>      | expressed sequence Al593442 [Source:MGI Symbol;Acc:MGI:2143099]                                                           | 330941     | 9               | 52673044       | 52679429     | 6386   | 94.21    | 1.75           | 5.63E-08 |
| ENSMUSG00000029372  | <b>Pppb</b>          | pro-platelet basic protein [Source:MGI Symbol;Acc:MGI:1888712]                                                            | 57349      | 5               | 90768518       | 90770060     | 1543   | 97.36    | 1.65           | 3.63E-05 |
| ENSMUSG00000085772  | <b>D630024D03Rik</b> | RIKEN cDNA D630024D03 gene [Source:MGI Symbol;Acc:MGI:3041224]                                                            |            | 11              | 31790113       | 31824524     | 34412  | 17.32    | 1.58           | 5.45E-05 |
| ENSMUSG00000026579  | <b>F5</b>            | coagulation factor V [Source:MGI Symbol;Acc:MGI:88382]                                                                    | 14067      | 1               | 164151838      | 164220277    | 68440  | 40.88    | 1.56           | 3.62E-04 |
| ENSMUSG00000090622  | <b>A930033H14Rik</b> | RIKEN cDNA A930033H14 gene [Source:MGI Symbol;Acc:MGI:2444562]                                                            |            | 10              | 69209762       | 69213098     | 3337   | 43.51    | 1.50           | 9.10E-07 |
| ENSMUSG00000052013  | <b>Btla</b>          | B and T lymphocyte associated [Source:MGI Symbol;Acc:MGI:2658978]                                                         | 208154     | 16              | 45224315       | 45252895     | 28581  | 18.50    | 1.49           | 1.59E-04 |
| ENSMUSG00000016255  | <b>Tubb1</b>         | tubulin, beta 1 class VI [Source:MGI Symbol;Acc:MGI:107814]                                                               | 545486     | 2               | 174450695      | 174457882    | 7188   | 50.62    | 1.41           | 1.55E-03 |
| ENSMUSG00000076656  | <b>Gapdh</b>         | glyceraldehyde-3-phosphate dehydrogenase [Source:MGI Symbol;Acc:MGI:95640]                                                | 14433      | 6               | 125161853      | 125166467    | 4615   | 98.23    | 1.40           | 8.28E-06 |
| ENSMUSG00000050447  | <b>Lypd6</b>         | LY6/PLAUR domain containing 6 [Source:MGI Symbol;Acc:MGI:2443848]                                                         | 320343     | 2               | 50066429       | 50193569     | 127141 | 22.66    | 1.28           | 1.51E-03 |
| ENSMUSG00000026014  | <b>Raph1</b>         | Ras association [RalGDS/AF-6] and pleckstrin homology domains 1 [Source:MGI Symbol;Acc:MGI:1924550]                       | 77300      | 1               | 60483191       | 60567104     | 83914  | 1480.02  | 1.22           | 4.56E-04 |
| ENSMUSG00000027322  | <b>Siglec1</b>       | sialic acid binding Ig-like lectin 1, sialoadhesin [Source:MGI Symbol;Acc:MGI:99668]                                      | 20612      | 2               | 131069220      | 131088765    | 17546  | 120.08   | 1.21           | 3.52E-04 |
| ENSMUSG00000081822  | <b>Gm15626</b>       | predicted gene 15626 [Source:MGI Symbol;Acc:MGI:3783070]                                                                  |            | 5               | 83299585       | 83300452     | 868    | 57.12    | 1.19           | 1.93E-03 |
| ENSMUSG00000034664  | <b>Itga2b</b>        | integrin alpha 2b [Source:MGI Symbol;Acc:MGI:96601]                                                                       | 16399      | 11              | 102453297      | 102470122    | 16826  | 75.64    | 1.18           | 1.38E-02 |
| ENSMUSG00000027326  | <b>Casc5</b>         | cancer susceptibility candidate 5 [Source:MGI Symbol;Acc:MGI:1923714]                                                     | 76464      | 2               | 119047119      | 119105501    | 58383  | 32.08    | 1.16           | 9.43E-04 |
| ENSMUSG00000027656  | <b>Wisp2</b>         | WNT1 inducible signaling pathway protein 2 [Source:MGI Symbol;Acc:MGI:1328326]                                            | 22403      | 2               | 163820861      | 163833146    | 12286  | 150.03   | 1.16           | 2.41E-06 |
| ENSMUSG00000038801  | <b>Scgb1c1</b>       | secretoglobin, family 1C, member 1 [Source:MGI Symbol;Acc:MGI:2655401]                                                    | 338417     | 7               | 140845565      | 140846768    | 1204   | 213.95   | 1.16           | 1.93E-05 |
| ENSMUSG00000065145  | <b>Vaultrc5</b>      | vault RNA component 5 [Source:MGI Symbol;Acc:MGI:2673990]                                                                 | 18         | 36801866        | 36802008       | 143          | 54.90  | 1.15     | 7.36E-03       |          |
| ENSMUSG00000026726  | <b>Cubn</b>          | cubilin (intrinsic factor-cobalamin receptor) [Source:MGI Symbol;Acc:MGI:1931256]                                         | 65969      | 2               | 13276338       | 13491924     | 21587  | 95.45    | 1.15           | 8.81E-04 |
| ENSMUSG00000073555  | <b>Gm4951</b>        | predicted gene 4951 [Source:MGI Symbol;Acc:MGI:3644953]                                                                   | 240327     | 18              | 60212080       | 60247820     | 35741  | 30.20    | 1.14           | 1.22E-03 |
| ENSMUSG00000021751  | <b>Acox2</b>         | acyl-Coenzyme A oxidase 2, branched chain [Source:MGI Symbol;Acc:MGI:1934852]                                             | 93732      | 14              | 8225511        | 8259353      | 33843  | 24.36    | 1.14           | 4.62E-03 |
| ENSMUSG00000062319  | <b>Gm10115</b>       | predicted gene 10115 [Source:MGI Symbol;Acc:MGI:3641675]                                                                  |            | 2               | 6950453        | 6951680      | 1228   | 45.53    | 1.13           | 1.25E-02 |
| ENSMUSG00000044258  | <b>Ctla2a</b>        | cytotoxic T lymphocyte-associated protein 2 alpha [Source:MGI Symbol;Acc:MGI:88554]                                       | 13024      | 13              | 60934155       | 60936625     | 2471   | 408.98   | 1.13           | 5.02E-09 |
| ENSMUSG00000026357  | <b>Rgs18</b>         | regulator of G-protein signaling 18 [Source:MGI Symbol;Acc:MGI:1927498]                                                   | 64214      | 1               | 144752683      | 144775435    | 22753  | 44.49    | 1.13           | 1.69E-03 |
| ENSMUSG00000097588  | <b>Gm17388</b>       | predicted gene 17388 [Source:MGI Symbol;Acc:MGI:4937022]                                                                  |            | 4               | 136355774      | 136359440    | 3667   | 33.54    | 1.12           | 1.46E-02 |
| ENSMUSG00000030159  | <b>Clec1b</b>        | C-type lectin domain family 1, member b [Source:MGI Symbol;Acc:MGI:1913287]                                               | 56760      | 6               | 129397297      | 129409335    | 12039  | 24.93    | 1.12           | 2.66E-02 |
| ENSMUSG00000030054  | <b>Gp9</b>           | glycoprotein 9 (platelet) [Source:MGI Symbol;Acc:MGI:1860137]                                                             | 54368      | 6               | 87778136       | 87779762     | 1627   | 18.41    | 1.11           | 2.78E-02 |
| ENSMUSG00000023341  | <b>Mx2</b>           | myxovirus (influenza virus) resistance 2 [Source:MGI Symbol;Acc:MGI:97244]                                                | 17858      | 16              | 97536083       | 97560899     | 24817  | 64.99    | 1.11           | 2.56E-04 |
| ENSMUSG00000064451  | <b>Snora23</b>       | small nucleolar RNA, H/ACA box 23 [Source:MGI Symbol;Acc:MGI:3819494]                                                     |            | 7               | 110046364      | 110046547    | 184    | 25.39    | 1.10           | 8.82E-03 |
| ENSMUSG00000021636  | <b>Marveld2</b>      | MARVEL (membrane-associating) domain containing 2 [Source:MGI Symbol;Acc:MGI:2446166]                                     | 218518     | 13              | 100595957      | 100616971    | 21015  | 27.69    | 1.09           | 4.12E-03 |
| ENSMUSG00000022594  | <b>Pscs</b>          | prostate stem cell antigen [Source:MGI Symbol;Acc:MGI:1919623]                                                            | 72373      | 15              | 74714839       | 74717063     | 2225   | 17.20    | 1.09           | 2.26E-02 |
| ENSMUSG00000063258  | <b>B230325K18Rik</b> | RIKEN cDNA B230325K18 gene [Source:MGI Symbol;Acc:MGI:2442200]                                                            |            | 7               | 127983079      | 127985701    | 2623   | 39.23    | 1.07           | 1.73E-02 |
| ENSMUSG00000082292  | <b>Gm12250</b>       | predicted gene 12250 [Source:MGI Symbol;Acc:MGI:3649299]                                                                  |            | 11              | 58183843       | 58190198     | 6356   | 158.85   | 1.06           | 2.90E-03 |
| ENSMUSG00000089542  | <b>Gm25835</b>       | predicted gene 25835 [Source:MGI Symbol;Acc:MGI:5455612]                                                                  |            | 11              | 69668852       | 69668995     | 144    | 192.81   | 1.06           | 2.12E-04 |
| ENSMUSG00000074056  | <b>Gm10615</b>       | predicted gene 10615 [Source:MGI Symbol;Acc:MGI:3642102]                                                                  |            | 9               | 110117703      | 110119916    | 2214   | 20.29    | 1.05           | 1.32E-02 |
| ENSMUSG000000800542 | <b>Gm22710</b>       | predicted gene 22710 [Source:MGI Symbol;Acc:MGI:5452487]                                                                  |            | 1               | 118459141      | 118459265    | 125    | 61.30    | 1.04           | 2.69E-03 |
| ENSMUSG000000907772 | <b>5430416N02Rik</b> | RIKEN cDNA 5430416N02 gene [Source:MGI Symbol;Acc:MGI:1918676]                                                            |            | 5               | 100420842      | 100429516    | 8675   | 22.86    | 1.04           | 1.80E-02 |
| ENSMUSG00000054135  | <b>A430110L20Rik</b> | RIKEN cDNA A430110L20 gene [Source:MGI Symbol;Acc:MGI:3036249]                                                            |            | 1               | 181225986      | 181228498    | 2513   | 20.56    | 1.04           | 3.01E-02 |
| ENSMUSG000000305208 | <b>Sifn8</b>         | schlafen 8 [Source:MGI Symbol;Acc:MGI:2672859]                                                                            | 276950     | 11              | 83002158       | 83020810     | 18653  | 16.00    | 1.03           | 3.97E-02 |
| ENSMUSG00000065822  | <b>Snord15a</b>      | small nucleolar RNA, C/D box 15A [Source:MGI Symbol;Acc:MGI:3645887]                                                      |            | 7               | 99482785       | 99482932     | 148    | 128.63   | 1.02           | 9.62E-05 |
| ENSMUSG00000086825  | <b>Gm15675</b>       | predicted gene 15675 [Source:MGI Symbol;Acc:MGI:3783117]                                                                  |            | 1               | 130429781      | 130437191    | 7411   | 35.66    | 1.02           | 2.30E-02 |
| ENSMUSG00000036353  | <b>P2ry12</b>        | purinergic receptor P2Y, G-protein coupled 12 [Source:MGI Symbol;Acc:MGI:1918089]                                         | 70839      | 3               | 59216271       | 59262831     | 4661   | 62.07    | 1.02           | 1.51E-03 |
| ENSMUSG00000037921  | <b>Ddx60</b>         | DEAD (Asp-Glu-Ala-Asp) box polypeptide 60 [Source:MGI Symbol;Acc:MGI:2384570]                                             | 234311     | 8               | 61928087       | 62037701     | 109615 | 212.09   | 1.02           | 1.72E-10 |
| ENSMUSG00000028989  | <b>Angpt17</b>       | angiopoietin-like 7 [Source:MGI Symbol;Acc:MGI:3605801]                                                                   | 654812     | 4               | 148495183      | 148500460    | 5278   | 334.87   | 1.02           | 6.64E-04 |
| ENSMUSG000000304317 | <b>Trim59</b>        | tripartite motif-containing 59 [Source:MGI Symbol;Acc:MGI:1914199]                                                        | 66949      | 3               | 69035288       | 69044755     | 9468   | 34.40    | 1.00           | 1.99E-02 |
| ENSMUSG00000031997  | <b>Trpc6</b>         | transient receptor potential cation channel, subfamily C, member 6 [Source:MGI Symbol;Acc:MGI:109523]                     | 22068      | 9               | 8544196        | 8680565      | 136370 | 31.16    | 1.00           | 2.28E-02 |
| ENSMUSG00000020838  | <b>Sic6a4</b>        | solute carrier family 6 (neurotransmitter transporter, serotonin), member 4 [Source:MGI Symbol;Acc:MGI:96285]             | 15567      | 11              | 76998603       | 77032340     | 33738  | 26.13    | 1.00           | 2.85E-02 |
| ENSMUSG00000037725  | <b>Ckap2</b>         | cytoskeleton associated protein 2 [Source:MGI Symbol;Acc:MGI:1931797]                                                     | 80986      | 8               | 22168152       | 22185819     | 17668  | 23.01    | 1.00           | 3.60E-02 |
| ENSMUSG00000089788  | <b>Gm16586</b>       | predicted gene 16586 [Source:MGI Symbol;Acc:MGI:4415006]                                                                  |            | 1               | 178321108      | 178324171    | 3064   | 371.81   | 1.00           | 9.42E-05 |
| ENSMUSG00000036192  | <b>Rorb</b>          | RAR-related orphan receptor beta [Source:MGI Symbol;Acc:MGI:1343464]                                                      | 225998     | 19              | 18930605       | 19111196     | 180592 | 73.58    | 0.98           | 1.36E-02 |
| ENSMUSG00000036913  | <b>Trim67</b>        | tripartite motif-containing 67 [Source:MGI Symbol;Acc:MGI:3045323]                                                        | 330863     | 8               | 124793019      | 124834713    | 41695  | 58.41    | 0.98           | 2.65E-03 |
| ENSMUSG00000088059  | <b>Mir1949</b>       | microRNA 1949 [Source:MGI Symbol;Acc:MGI:3837022]                                                                         |            | 18              | 35554492       | 35554632     | 141    | 106.50   | 0.98           | 9.50E-03 |
| ENSMUSG00000090222  | <b>Gm16340</b>       | predicted gene 16340 [Source:MGI Symbol;Acc:MGI:3840117]                                                                  |            | 1               | 17375837       | 173802720    | 26884  | 61.99    | 0.98           | 1.34E-02 |
| ENSMUSG00000089185  | <b>Ccl8</b>          | chemokine (C-C motif) ligand 8 [Source:MGI Symbol;Acc:MGI:101878]                                                         | 20307      | 11              | 82115185       | 82116799     | 1615   | 32.36    | 0.98           | 2.54E-02 |
| ENSMUSG00000026077  | <b>Npas2</b>         | neuronal PAS domain protein 2 [Source:MGI Symbol;Acc:MGI:109232]                                                          | 18143      | 1               | 39193731       | 39363234     | 169504 | 23.70    | 0.98           | 4.74E-02 |
| ENSMUSG00000018654  | <b>Ilkzf1</b>        | IKAROS family zinc finger 1 [Source:MGI Symbol;Acc:MGI:1342540]                                                           | 22778      | 11              | 11685003       | 11772926     | 87924  | 40.42    | 0.97           | 4.40E-03 |
| ENSMUSG00000078493  | <b>A930039A15Rik</b> | RIKEN cDNA A930039A15 gene [Source:MGI Symbol;Acc:MGI:3641728]                                                            |            | 1               | 153905301      | 153916910    | 11610  | 28.51    | 0.97           | 1.74E-02 |
| ENSMUSG00000001020  | <b>S100a4</b>        | S100 calcium binding protein A4 [Source:MGI Symbol;Acc:MGI:1330282]                                                       | 20198      | 3               | 90603770       | 90606045     | 2276   | 83.64    | 0.96           | 4.96E-03 |
| ENSMUSG00000065226  | <b>Gm25791</b>       | predicted gene 25791 [Source:MGI Symbol;Acc:MGI:5455568]                                                                  |            | 9               | 15314845       | 15314981     | 137    | 244.22   | 0.94           | 6.00E-05 |
| ENSMUSG00000065725  | <b>Gm26165</b>       | predicted gene 26165 [Source:MGI Symbol;Acc:MGI:5455942]                                                                  |            | 2               | 144261589      | 144261726    | 138    | 59.21    | 0.93           | 1.21E-02 |
| ENSMUSG00000073489  | <b>Ifi204</b>        | interferon activated gene 204 [Source:MGI Symbol;Acc:MGI:96429]                                                           | 15951      | 1               | 173747293      | 173768766    | 19584  | 136.55   | 0.92           | 1.02E-02 |
| ENSMUSG00000034459  | <b>Ifit1</b>         | interferon-induced protein with tetratricopeptide repeats 1 [Source:MGI Symbol;Acc:MGI:99450]                             | 15957      | 19              | 34640871       | 34650009     | 9139   | 182.62   | 0.92           | 8.19E-05 |
| ENSMUSG00000073409  | <b>H2-Q6</b>         | histocompatibility 2, Q region locus 6 [Source:MGI Symbol;Acc:MGI:95935]                                                  | 15019      | 17              | 35424850       | 35430055     | 5206   | 107.02   | 0.92           | 2.82E-03 |
| ENSMUSG00000026380  | <b>Tfcp2l1</b>       | transcription factor CP2-like 1 [Source:MGI Symbol;Acc:MGI:2444691]                                                       | 81879      | 1               | 118627945      | 118685167    | 57223  | 72.68    | 0.92           | 1.03E-02 |
| ENSMUSG00000053007  | <b>Creb5</b>         | cAMP responsive element binding protein 5 [Source:MGI Symbol;Acc:MGI:2443973]                                             | 231991     | 6               | 53573384       | 53696007     | 122624 | 50.40    | 0.92           | 8.35E-03 |
| ENSMUSG00000078122  | <b>G630028O10Rik</b> | RIKEN cDNA G630028O10 gene [Source:MGI Symbol;Acc:MGI:3641813]                                                            |            | X               | 96239942       | 96243636     | 3695   | 98.51    | 0.91           | 1.24E-04 |
| ENSMUSG00000060614  | <b>Prg4</b>          | proteoglycan 4 (megakaryocyte stimulating factor, articular superficial zone protein) [Source:MGI Symbol;Acc:MGI:1891344] | 96875      | 1               | 150449412      | 150466165    | 16754  | 144.57   | 0.91           | 1.51E-04 |
| ENSMUSG00000074415  | <b>2610203C20Rik</b> | RIKEN cDNA 2610203C20 gene [Source:MGI Symbol;Acc:MGI:1917705]                                                            |            | 9               | 41580741       | 41617772     | 37032  | 138.03   | 0.91           | 1.74E-02 |
| ENSMUSG00000025255  | <b>Zfx4</b>          | zinc finger homeodomain 4 [Source:MGI Symbol;Acc:MGI:2137668]                                                             | 80892      | 3               | 5218526        | 5415857      | 197332 | 43.77    | 0.91           | 2.66E-02 |
| ENSMUSG00000027318  | <b>Adam33</b>        | a disintegrin and metalloproteinase domain 33 [Source:MGI Symbol;Acc:MGI:1341813]                                         | 110751     | 2               | 131050591      | 131063814    | 13224  | 28.25    | 0.90           | 3.69E-02 |

|                    |                      |                                                                                               |          |    |           |           |         |        |             |          |
|--------------------|----------------------|-----------------------------------------------------------------------------------------------|----------|----|-----------|-----------|---------|--------|-------------|----------|
| ENSMUSG00000064853 | <b>Gm23442</b>       | predicted gene, 23442 [Source:MGI Symbol;Acc:MGI:5453219]                                     |          | 17 | 35162563  | 35162696  | 134     | 378,72 | <b>0,90</b> | 6,35E-04 |
| ENSMUSG00000042167 | <b>Papd4</b>         | PAP associated domain containing 4 [Source:MGI Symbol;Acc:MGI:2140950]                        | 100715   | 13 | 93147400  | 93192283  | 44884   | 66,84  | <b>0,90</b> | 9,12E-03 |
| ENSMUSG00000065637 | <b>Gm26397</b>       | predicted gene, 26397 [Source:MGI Symbol;Acc:MGI:5456174]                                     |          | 8  | 126944847 | 126944980 | 134     | 344,74 | <b>0,89</b> | 7,54E-04 |
| ENSMUSG00000038147 | <b>Cd84</b>          | CD84 antigen [Source:MGI Symbol;Acc:MGI:1336885]                                              | 12523    | 1  | 171839697 | 171890718 | 51022   | 76,39  | <b>0,89</b> | 4,60E-04 |
| ENSMUSG00000095123 | <b>Gm21781</b>       | predicted gene, 21781 [Source:MGI Symbol;Acc:MGI:5433945]                                     |          | 10 | 4391587   | 4396424   | 4838    | 76,78  | <b>0,89</b> | 1,89E-02 |
| ENSMUSG00000020120 | <b>Plek</b>          | pleckstrin [Source:MGI Symbol;Acc:MGI:1860485]                                                | 56193    | 11 | 16971206  | 17052381  | 81176   | 292,51 | <b>0,88</b> | 1,62E-02 |
| ENSMUSG00000049744 | <b>Arhgap15</b>      | Rho GTPase activating protein 15 [Source:MGI Symbol;Acc:MGI:1923367]                          | 76117    | 2  | 43748824  | 44395953  | 647130  | 53,85  | <b>0,88</b> | 2,41E-02 |
| ENSMUSG00000031167 | <b>Rbm3</b>          | RNA binding motif protein 3 [Source:MGI Symbol;Acc:MGI:1099460]                               | 19652 X  |    | 8138975   | 8145880   | 6906    | 162,89 | <b>0,87</b> | 6,07E-06 |
| ENSMUSG00000000318 | <b>Clec10a</b>       | C-type lectin domain family 10, member A [Source:MGI Symbol;Acc:MGI:96975]                    | 17312    | 11 | 70156197  | 70170834  | 14638   | 100,25 | <b>0,87</b> | 1,75E-03 |
| ENSMUSG00000020437 | <b>Myo1g</b>         | myosin IG [Source:MGI Symbol;Acc:MGI:1927091]                                                 | 246177   | 11 | 6506548   | 6520965   | 14418   | 32,89  | <b>0,86</b> | 3,82E-02 |
| ENSMUSG00000060429 | <b>Sntb1</b>         | syntrophin, basic 1 [Source:MGI Symbol;Acc:MGI:101781]                                        | 20649    | 15 | 55638843  | 55906949  | 268107  | 70,89  | <b>0,86</b> | 1,53E-03 |
| ENSMUSG00000096696 | <b>Zfp960</b>        | zinc finger protein 960 [Source:MGI Symbol;Acc:MGI:3052731]                                   | 449000   | 17 | 17064113  | 17089628  | 25516   | 47,84  | <b>0,85</b> | 5,60E-03 |
| ENSMUSG00000025498 | <b>Irf7</b>          | interferon regulatory factor 7 [Source:MGI Symbol;Acc:MGI:1859212]                            | 54123    | 7  | 141262706 | 141266481 | 3776    | 187,95 | <b>0,84</b> | 8,99E-05 |
| ENSMUSG00000059401 | <b>Mamld1</b>        | mastermind-like domain containing 1 [Source:MGI Symbol;Acc:MGI:3045303]                       | 333639 X |    | 71050256  | 71156056  | 105801  | 87,24  | <b>0,84</b> | 4,80E-02 |
| ENSMUSG00000029915 | <b>Clec5a</b>        | C-type lectin domain family 5, member a [Source:MGI Symbol;Acc:MGI:1345151]                   | 23845    | 6  | 40574894  | 40585821  | 10928   | 38,21  | <b>0,84</b> | 3,46E-02 |
| ENSMUSG00000024965 | <b>Fermt3</b>        | fermitin family homolog 3 (Drosophila) [Source:MGI Symbol;Acc:MGI:2147790]                    | 108101   | 19 | 6998958   | 7019469   | 20512   | 87,91  | <b>0,84</b> | 3,88E-03 |
| ENSMUSG00000031938 | <b>4931406C07Rik</b> | RIKEN cDNA 4931406C07 gene [Source:MGI Symbol;Acc:MGI:1918234]                                | 70984    | 9  | 15283337  | 15306448  | 23112   | 142,98 | <b>0,83</b> | 8,67E-05 |
| ENSMUSG00000052572 | <b>Dlg2</b>          | discs, large homolog 2 (Drosophila) [Source:MGI Symbol;Acc:MGI:1344351]                       | 23859    | 7  | 91090706  | 92447003  | 1356298 | 59,30  | <b>0,83</b> | 2,06E-02 |
| ENSMUSG00000035273 | <b>Hpse</b>          | heparanase [Source:MGI Symbol;Acc:MGI:1343124]                                                | 15442    | 5  | 100679484 | 100719716 | 40233   | 35,85  | <b>0,83</b> | 3,84E-02 |
| ENSMUSG00000085334 | <b>Gm12940</b>       | predicted gene 12940 [Source:MGI Symbol;Acc:MGI:3702626]                                      |          | 4  | 127033731 | 127049398 | 15668   | 159,45 | <b>0,81</b> | 2,69E-02 |
| ENSMUSG00000045932 | <b>Irf12</b>         | interferon-induced protein with tetratricopeptide repeats 2 [Source:MGI Symbol;Acc:MGI:99449] | 15958    | 19 | 34550694  | 34576419  | 25726   | 551,97 | <b>0,80</b> | 1,09E-04 |
| ENSMUSG00000037143 | <b>4930529M08Rik</b> | RIKEN cDNA 4930529M08 gene [Source:MGI Symbol;Acc:MGI:1926024]                                | 78774    | 2  | 145934784 | 146215039 | 280256  | 66,51  | <b>0,80</b> | 1,66E-02 |

Downregulated genes in  
vTBX5KO ventricles  
Log2foldchange <-0.8

| ensembl_gene_id     | external_gene_id     | description                                                                                                               | entrezgene | chromosome_name | start_position | end_position | length  | baseMean | log2FoldChange | padj     |
|---------------------|----------------------|---------------------------------------------------------------------------------------------------------------------------|------------|-----------------|----------------|--------------|---------|----------|----------------|----------|
| ENSMUSG00000044067  | <b>Gpr22</b>         | G protein-coupled receptor 22 [Source:MG Symbol;Acc:MG:1920260]                                                           | 73010      | 12              | 31706867       | 31713947     | 7081    | 1442.01  | -2.98          | 6.57E-33 |
| ENSMUSG00000022442  | <b>Tu11</b>          | tubulin tyrosine ligase-like 1 [Source:MG Symbol;Acc:MG:2443047]                                                          | 319553     | 15              | 83483772       | 83510893     | 27122   | 315.57   | -2.50          | 2.30E-39 |
| ENSMUSG00000028307  | <b>Aldob</b>         | aldolase B, fructose-bisphosphate [Source:MG Symbol;Acc:MG:87995]                                                         | 230163     | 4               | 49535955       | 49549546     | 13552   | 121.32   | -2.23          | 2.51E-29 |
| ENSMUSG00000050953  | <b>Gja1</b>          | gap junction protein, alpha 1 [Source:MG Symbol;Acc:MG:95713]                                                             | 14609      | 10              | 56377300       | 56390419     | 13120   | 5422.87  | -2.23          | 1.60E-29 |
| ENSMUSG00000036242  | <b>3632451O06Rik</b> | RIKEN cDNA 3632451O06 gene [Source:MG Symbol;Acc:MG:1914669]                                                              | 67419      | 14              | 49881560       | 49783383     | 101824  | 240.43   | -2.23          | 6.43E-33 |
| ENSMUSG00000028605  | <b>Canpf</b>         | centromere protein F [Source:MG Symbol;Acc:MG:1313302]                                                                    | 108000     | 1               | 189640599      | 189689086    | 47488   | 783.03   | -2.05          | 2.11E-18 |
| ENSMUSG00000031230  | <b>Fgf16</b>         | fibroblast growth factor 16 [Source:MG Symbol;Acc:MG:1931627]                                                             | 80903      | X               | 105784279      | 105774939    | 10661   | 205.95   | -1.91          | 1.68E-19 |
| ENSMUSG00000000889  | <b>Dhh</b>           | dopamine beta hydroxylase [Source:MG Symbol;Acc:MG:94864]                                                                 | 13166      | 2               | 27165233       | 27183200     | 17968   | 18.24    | -1.79          | 9.76E-07 |
| ENSMUSG00000032511  | <b>Scn5a</b>         | sodium channel, voltage-gated, type V, alpha [Source:MG Symbol;Acc:MG:98251]                                              | 20271      | 9               | 119483408      | 119579016    | 95609   | 4669.07  | -1.78          | 3.05E-14 |
| ENSMUSG00000073154  | <b>9330158H04Rik</b> | RIKEN cDNA 9330158H04 gene [Source:MG Symbol;Acc:MG:2442094]                                                              | 6          | 36209620        | 36390191       | 180572       | 140.55  | -1.77    | 5.60E-18       |          |
| ENSMUSG00000036264  | <b>Fstl4</b>         | folistatin-like 4 [Source:MG Symbol;Acc:MG:2443199]                                                                       | 320027     | 11              | 52746344       | 53188538     | 423905  | 33.47    | -1.75          | 6.29E-08 |
| ENSMUSG00000032034  | <b>Kcnj5</b>         | potassium inwardly-rectifying channel, subfamily J, member 5 [Source:MG Symbol;Acc:MG:104755]                             | 16521      | 9               | 32314783       | 32344237     | 29455   | 1350.47  | -1.73          | 2.72E-27 |
| ENSMUSG00000087129  | <b>Gm16316</b>       | predicted gene 16316 [Source:MG Symbol;Acc:MG:3826530]                                                                    | 2          | 163855004       | 163892279      | 7276         | 16.20   | -1.66    | 7.13E-05       |          |
| ENSMUSG00000057015  | <b>Gm10801</b>       | predicted gene 10801 [Source:MG Symbol;Acc:MG:3641656]                                                                    | 2          | 98662237        | 98664083       | 1847         | 28.51   | -1.51    | 3.78E-04       |          |
| ENSMUSG00000047085  | <b>Lrrc4b</b>        | leucine rich repeat containing 4B [Source:MG Symbol;Acc:MG:3027390]                                                       | 272381     | 7               | 44429018       | 44463351     | 34334   | 544.60   | -1.44          | 6.12E-08 |
| ENSMUSG00000027270  | <b>Pde11a</b>        | phosphodiesterase 11A [Source:MG Symbol;Acc:MG:3036251]                                                                   | 241489     | 2               | 75899141       | 76338774     | 349634  | 57.93    | -1.41          | 3.60E-06 |
| ENSMUSG00000043795  | <b>Gm14492</b>       | predicted gene 14492 [Source:MG Symbol;Acc:MG:3642289]                                                                    | 7          | 142491074       | 142506771      | 15698        | 69.39   | -1.39    | 7.91E-07       |          |
| ENSMUSG000000033849 | <b>B3gal2</b>        | UDP-Gal:betaGalNAc beta 1,3-galactosyltransferase, polypeptide 2 [Source:MG Symbol;Acc:MG:1349461]                        | 26878      | 1               | 143640664      | 143650466    | 9743    | 343.44   | -1.38          | 1.32E-03 |
| ENSMUSG00000052837  | <b>Junb</b>          | Jun-B oncogene [Source:MG Symbol;Acc:MG:96647]                                                                            | 16477      | 8               | 84976909       | 84978748     | 1840    | 436.21   | -1.36          | 7.13E-04 |
| ENSMUSG000000072902 | <b>Gm10435</b>       | predicted gene 10435 [Source:MG Symbol;Acc:MG:3642820]                                                                    | 11         | 59002910        | 59007293       | 4384         | 104.62  | -1.35    | 5.45E-05       |          |
| ENSMUSG00000008136  | <b>Fhl2</b>          | four and a half LIM domains 2 [Source:MG Symbol;Acc:MG:1338762]                                                           | 14200      | 1               | 43123074       | 43163961     | 40888   | 15848.77 | -1.35          | 1.64E-11 |
| ENSMUSG00000045613  | <b>Chrm2</b>         | cholinergic receptor, muscarinic 2, cardiac [Source:MG Symbol;Acc:MG:88397]                                               | 243764     | 6               | 36388084       | 36528414     | 140331  | 3813.70  | -1.33          | 1.04E-12 |
| ENSMUSG00000024053  | <b>Emilin2</b>       | elastin microfibril interfacer 2 [Source:MG Symbol;Acc:MG:2389136]                                                        | 246707     | 17              | 71252176       | 71310965     | 58790   | 588.43   | -1.32          | 5.82E-08 |
| ENSMUSG00000060716  | <b>Plekhh1</b>       | pleckstrin homology domain containing, family H (with MyTH domain) member 1 [Source:MG Symbol;Acc:MG:2144989]             | 211945     | 12              | 79029163       | 79081648     | 52486   | 94.05    | -1.31          | 8.03E-07 |
| ENSMUSG00000020388  | <b>Pdlim4</b>        | PDZ and LIM domain 4 [Source:MG Symbol;Acc:MG:1353470]                                                                    | 30794      | 11              | 54054928       | 54069014     | 14087   | 132.63   | -1.31          | 5.69E-10 |
| ENSMUSG00000085162  | <b>Gm12295</b>       | predicted gene 12295 [Source:MG Symbol;Acc:MG:3650535]                                                                    | 11         | 65277654        | 65365798       | 88145        | 65.06   | -1.28    | 3.11E-06       |          |
| ENSMUSG00000090157  | <b>Gm16534</b>       | predicted gene 16534 [Source:MG Symbol;Acc:MG:4413442]                                                                    | 2          | 32050086        | 32064911       | 14826        | 28.02   | -1.27    | 2.07E-04       |          |
| ENSMUSG00000059852  | <b>Kcnq2</b>         | potassium voltage-gated channel, subfamily G, member 2 [Source:MG Symbol;Acc:MG:3694646]                                  | 240444     | 18              | 80294546       | 80364254     | 69709   | 1151.07  | -1.27          | 2.11E-19 |
| ENSMUSG00000028195  | <b>Cyr61</b>         | cysteine rich protein 61 [Source:MG Symbol;Acc:MG:88613]                                                                  | 16007      | 3               | 145646971      | 145649985    | 3015    | 1352.15  | -1.23          | 2.11E-03 |
| ENSMUSG00000028318  | <b>Polr1e</b>        | polymerase (RNA) I polypeptide E [Source:MG Symbol;Acc:MG:1929022]                                                        | 64424      | 4               | 45018583       | 45036565     | 17983   | 273.11   | -1.23          | 6.83E-10 |
| ENSMUSG00000022215  | <b>Fitm1</b>         | fat storage-inducing transmembrane protein 1 [Source:MG Symbol;Acc:MG:1915930]                                            | 68680      | 14              | 55575617       | 55576952     | 1336    | 1111.94  | -1.21          | 5.82E-08 |
| ENSMUSG00000003934  | <b>Efnb3</b>         | ephrin B3 [Source:MG Symbol;Acc:MG:109196]                                                                                | 13643      | 11              | 69554092       | 69560205     | 6114    | 1218.17  | -1.19          | 2.03E-12 |
| ENSMUSG00000030433  | <b>Skb2</b>          | SKB-binding domain kinase family, member 2 [Source:MG Symbol;Acc:MG:2685925]                                              | 381836     | 7               | 4956134        | 4964390      | 8257    | 62.34    | -1.18          | 4.98E-03 |
| ENSMUSG00000021236  | <b>Entpd5</b>        | ethanolucleoside triphosphate diphosphohydrolase 5 [Source:MG Symbol;Acc:MG:1321385]                                      | 12949      | 12              | 84373857       | 84409029     | 35173   | 4953.03  | -1.17          | 3.03E-29 |
| ENSMUSG00000039488  | <b>Cntn5</b>         | contactin 5 [Source:MG Symbol;Acc:MG:3042287]                                                                             | 244682     | 9               | 9660891        | 10904775     | 1243885 | 72.72    | -1.16          | 7.23E-04 |
| ENSMUSG00000033595  | <b>Lgi3</b>          | leucine-rich repeat LGI family, member 3 [Source:MG Symbol;Acc:MG:2182619]                                                | 213469     | 14              | 70530821       | 70538323     | 7503    | 50.73    | -1.15          | 6.09E-05 |
| ENSMUSG0000008658   | <b>Rbfox1</b>        | RNA binding protein, fox-1 homolog (C. elegans) 1 [Source:MG Symbol;Acc:MG:1926224]                                       | 268859     | 16              | 6809222        | 7412479      | 603258  | 780.07   | -1.15          | 2.86E-15 |
| ENSMUSG00000020866  | <b>Caacn1g</b>       | calcium channel, voltage-dependent, T type, alpha 1G subunit [Source:MG Symbol;Acc:MG:1201678]                            | 12291      | 11              | 94408391       | 94474198     | 65808   | 237.88   | -1.15          | 1.69E-03 |
| ENSMUSG00000029019  | <b>Nppb</b>          | natriuretic peptide type B [Source:MG Symbol;Acc:MG:97368]                                                                | 18158      | 4               | 147985788      | 147987205    | 1418    | 1595.01  | -1.15          | 1.37E-02 |
| ENSMUSG00000075014  | <b>Gm10800</b>       | predicted gene 10800 [Source:MG Symbol;Acc:MG:3641657]                                                                    | 2          | 98666547        | 98667301       | 755          | 317.55  | -1.15    | 1.87E-02       |          |
| ENSMUSG00000042895  | <b>Abra</b>          | actin-binding Rho activating protein [Source:MG Symbol;Acc:MG:2444891]                                                    | 223513     | 15              | 41865293       | 41869720     | 4428    | 1297.84  | -1.13          | 1.98E-04 |
| ENSMUSG00000040247  | <b>Tbc1d10c</b>      | TBC1 domain family, member 10c [Source:MG Symbol;Acc:MG:1922072]                                                          | 108995     | 19              | 4184358        | 4191047      | 6690    | 97.21    | -1.12          | 8.35E-08 |
| ENSMUSG00000032224  | <b>Fam81a</b>        | family with sequence similarity 81, member A [Source:MG Symbol;Acc:MG:1924136]                                            | 76886      | 9               | 70089310       | 70142560     | 53251   | 186.88   | -1.11          | 7.57E-08 |
| ENSMUSG00000020926  | <b>Adam11</b>        | a disintegrin and metallopeptidase domain 11 [Source:MG Symbol;Acc:MG:1098667]                                            | 11488      | 11              | 102761439      | 102780262    | 18824   | 69.04    | -1.11          | 7.36E-03 |
| ENSMUSG00000078137  | <b>Ankrd63</b>       | ankyrin repeat domain 63 [Source:MG Symbol;Acc:MG:2686183]                                                                | 383787     | 7               | 118699103      | 118703963    | 4861    | 28.03    | -1.09          | 2.90E-03 |
| ENSMUSG000000370570 | <b>Slc17a7</b>       | solute carrier family 17 (sodium-dependent inorganic phosphate cotransporter), member 7 [Source:MG Symbol;Acc:MG:1920211] | 72961      | 2               | 45163921       | 45176138     | 12218   | 195.54   | -1.08          | 5.05E-03 |
| ENSMUSG00000098178  | <b>Gm26924</b>       | predicted gene, 26924 [Source:MG Symbol;Acc:MG:5504039]                                                                   | 17         | 39846958        | 39848788       | 1831         | 6601.61 | -1.06    | 2.26E-02       |          |
| ENSMUSG00000042961  | <b>Egflam</b>        | EGF-like, fibronectin type III and laminin G domains [Source:MG Symbol;Acc:MG:2146149]                                    | 268780     | 15              | 7206120        | 7398395      | 192276  | 260.28   | -1.05          | 7.75E-12 |
| ENSMUSG00000040990  | <b>Sh3kbp1</b>       | SH3-domain kinase binding protein 1 [Source:MG Symbol;Acc:MG:1889583]                                                     | 58194      | X               | 159627272      | 159978069    | 350798  | 1345.12  | -1.04          | 1.32E-16 |
| ENSMUSG00000047298  | <b>Kcnv2</b>         | potassium channel, subfamily V, member 2 [Source:MG Symbol;Acc:MG:2670981]                                                | 240595     | 19              | 27322588       | 27337179     | 14592   | 397.95   | -1.04          | 3.80E-06 |
| ENSMUSG00000006356  | <b>Crip2</b>         | cysteine rich protein 2 [Source:MG Symbol;Acc:MG:1915587]                                                                 | 68337      | 12              | 113140236      | 113145504    | 5269    | 8484.92  | -1.04          | 4.64E-04 |
| ENSMUSG000000922201 | <b>A530058N18Rik</b> | RIKEN cDNA A530058N18 gene [Source:MG Symbol;Acc:MG:2444858]                                                              | 2          | 114013563       | 114068324      | 54762        | 76.67   | -1.03    | 1.95E-02       |          |
| ENSMUSG00000053560  | <b>Ier2</b>          | immediate early response 2 [Source:MG Symbol;Acc:MG:104815]                                                               | 15936      | 8               | 84661331       | 84662852     | 1522    | 190.10   | -1.02          | 3.38E-02 |
| ENSMUSG00000024063  | <b>Lbh</b>           | limb-bud and heart [Source:MG Symbol;Acc:MG:1925139]                                                                      | 77889      | 17              | 72918305       | 72941942     | 23638   | 8704.11  | -1.02          | 3.78E-20 |
| ENSMUSG00000035268  | <b>Pkig</b>          | protein kinase inhibitor, gamma [Source:MG Symbol;Acc:MG:1343086]                                                         | 18769      | 2               | 163658386      | 163726158    | 67773   | 1745.95  | -1.02          | 1.06E-13 |
| ENSMUSG00000026114  | <b>Cng3</b>          | cyclic nucleotide gated channel alpha 3 [Source:MG Symbol;Acc:MG:1341818]                                                 | 12790      | 1               | 37218336       | 37263384     | 45049   | 108.65   | -1.02          | 3.06E-06 |
| ENSMUSG00000092397  | <b>C130080G10Rik</b> | RIKEN cDNA C130080G10 gene [Source:MG Symbol;Acc:MG:4844008]                                                              | 2          | 114054335       | 114064868      | 10534        | 916.23  | -1.02    | 1.49E-14       |          |
| ENSMUSG00000035357  | <b>Pdzr3</b>         | PDZ domain containing RING finger 3 [Source:MG Symbol;Acc:MG:1933157]                                                     | 55983      | 6               | 101149609      | 101377897    | 228289  | 547.04   | -1.01          | 4.22E-07 |
| ENSMUSG00000027030  | <b>Stk39</b>         | serine/threonine kinase 39 [Source:MG Symbol;Acc:MG:1858416]                                                              | 53416      | 2               | 68210445       | 68472268     | 261824  | 2120.65  | -1.01          | 7.95E-15 |
| ENSMUSG00000038417  | <b>Fig4</b>          | FIG4 homolog (S. cerevisiae) [Source:MG Symbol;Acc:MG:2143585]                                                            | 103199     | 10              | 41188172       | 41303241     | 115070  | 1064.02  | -1.01          | 2.15E-09 |
| ENSMUSG00000097805  | <b>Gm17473</b>       | predicted gene, 17473 [Source:MG Symbol;Acc:MG:4937107]                                                                   | 5          | 42676260        | 42704616       | 28357        | 19.23   | -0.99    | 2.12E-02       |          |
| ENSMUSG00000045087  | <b>S1pr5</b>         | sphingosine-1-phosphate receptor 5 [Source:MG Symbol;Acc:MG:2150641]                                                      | 94226      | 19              | 21242912       | 21248443     | 5532    | 18.46    | -0.99          | 4.28E-02 |
| ENSMUSG00000045201  | <b>Lrrc3b</b>        | leucine rich repeat containing 3B [Source:MG Symbol;Acc:MG:2384996]                                                       | 218763     | 14              | 15357519       | 15438987     | 81469   | 300.26   | -0.98          | 3.77E-03 |
| ENSMUSG00000019997  | <b>Ctgf</b>          | connective tissue growth factor [Source:MG Symbol;Acc:MG:95537]                                                           | 14219      | 10              | 24595442       | 24598683     | 3242    | 1453.11  | -0.98          | 4.19E-03 |
| ENSMUSG00000060187  | <b>Lrrc10</b>        | leucine rich repeat containing 10 [Source:MG Symbol;Acc:MG:2448063]                                                       | 237560     | 10              | 117045341      | 117046768    | 1428    | 1537.96  | -0.96          | 1.02E-05 |
| ENSMUSG00000037815  | <b>Ctnn1a</b>        | catenin (cadherin associated protein), alpha 1 [Source:MG Symbol;Acc:MG:88274]                                            | 12385      | 18              | 35118888       | 35254773     | 135886  | 11420.81 | -0.96          | 4.30E-13 |
| ENSMUSG00000056708  | <b>Ier5</b>          | immediate early response 5 [Source:MG Symbol;Acc:MG:1337072]                                                              | 15939      | 1               | 155096367      | 155099636    | 3270    | 915.91   | -0.95          | 2.41E-02 |
| ENSMUSG00000047485  | <b>Khlh34</b>        | kelch-like 34 [Source:MG Symbol;Acc:MG:2685234]                                                                           | 245683     | X               | 157818435      | 157820369    | 1935    | 93.29    | -0.94          | 1.09E-04 |
| ENSMUSG00000037949  | <b>Ano10</b>         | anoctamin 10 [Source:MG Symbol;Acc:MG:2143103]                                                                            | 102566     | 9               | 122175879      | 122294374    | 118496  | 777.61   | -0.94          | 2.74E-13 |
| ENSMUSG00000078612  | <b>Ighg2c</b>        | immunoglobulin heavy constant gamma 2C [Source:MG Symbol;Acc:MG:2686979]                                                  | 12         | 113285325       | 113288930      | 3606         | 70.27   | -0.94    | 1.78E-03       |          |
| ENSMUSG00000020256  | <b>Aldh12</b>        | aldehyde dehydrogenase 1 family, member L2 [Source:MG Symbol;Acc:MG:2444680]                                              | 216188     | 10              | 83487450       | 83534140     | 46691   | 262.97   | -0.93          | 2.28E-08 |
| ENSMUSG00000082308  | <b>Gm15770</b>       | predicted gene 15770 [Source:MG Symbol;Acc:MG:3783212]                                                                    | 5          | 142852616       | 142853199      | 584          | 37.84   | -0.93    | 4.18E-02       |          |

|                    |                     |                                                                                          |        |    |           |           |        |          |       |          |
|--------------------|---------------------|------------------------------------------------------------------------------------------|--------|----|-----------|-----------|--------|----------|-------|----------|
| ENSMUSG00000046516 | <b>Cox17</b>        | cytochrome c oxidase assembly protein 17 [Source:MGI Symbol;Acc:MGI:1333806]             | 12856  | 16 | 38346991  | 38352763  | 5773   | 802,53   | -0.93 | 3.72E-08 |
| ENSMUSG00000034574 | <b>Daam1</b>        | dishevelled associated activator of morphogenesis 1 [Source:MGI Symbol;Acc:MGI:1914596]  | 208846 | 12 | 71831078  | 71992367  | 161290 | 2532,15  | -0.90 | 4.03E-09 |
| ENSMUSG00000054469 | <b>Lciat1</b>       | lysocardiolipin acyltransferase 1 [Source:MGI Symbol;Acc:MGI:2684937]                    | 225010 | 17 | 73107985  | 73243368  | 135384 | 2136,59  | -0.89 | 1.51E-03 |
| ENSMUSG00000047419 | <b>Cmya5</b>        | cardiomyopathy associated 5 [Source:MGI Symbol;Acc:MGI:1923719]                          | 76469  | 13 | 93040713  | 93144724  | 104012 | 25328,39 | -0.89 | 2.13E-03 |
| ENSMUSG00000039640 | <b>Mrp12</b>        | mitochondrial ribosomal protein L12 [Source:MGI Symbol;Acc:MGI:1926273]                  | 56282  | 11 | 120484613 | 120489065 | 4453   | 1241,60  | -0.88 | 4.95E-02 |
| ENSMUSG00000021314 | <b>Amph</b>         | amphiphysin [Source:MGI Symbol;Acc:MGI:103574]                                           | 218038 | 13 | 18948371  | 19150913  | 202543 | 54,76    | -0.88 | 3.44E-03 |
| ENSMUSG00000097317 | <b>Gm17281</b>      | predicted gene, 17281 [Source:MGI Symbol;Acc:MGI:4936915]                                |        | 2  | 91250743  | 91255995  | 5253   | 300,77   | -0.87 | 7.57E-08 |
| ENSMUSG00000064202 | <b>443040218Rik</b> | RIKEN cDNA 443040218 gene [Source:MGI Symbol;Acc:MGI:1918036]                            | 381218 | 19 | 28901268  | 28967800  | 66533  | 123,86   | -0.86 | 1.96E-03 |
| ENSMUSG00000074227 | <b>Spint2</b>       | serine protease inhibitor, Kunitz type 2 [Source:MGI Symbol;Acc:MGI:1338031]             | 20733  | 7  | 29256331  | 29281977  | 25647  | 205,83   | -0.85 | 3.00E-02 |
| ENSMUSG00000042249 | <b>Adrbk2</b>       | adrenergic receptor kinase, beta 2 [Source:MGI Symbol;Acc:MGI:87941]                     | 320129 | 5  | 112910478 | 113015514 | 105037 | 463,14   | -0.85 | 3.80E-06 |
| ENSMUSG00000064302 | <b>Clasp1</b>       | CLIP associating protein 1 [Source:MGI Symbol;Acc:MGI:1923957]                           | 76707  | 1  | 11839058  | 118609432 | 220375 | 6451,77  | -0.84 | 1.64E-04 |
| ENSMUSG00000067653 | <b>Ankrd23</b>      | ankyrin repeat domain 23 [Source:MGI Symbol;Acc:MGI:1925571]                             | 78321  | 1  | 36530534  | 36535729  | 5196   | 4476,88  | -0.83 | 1.69E-02 |
| ENSMUSG00000004791 | <b>Pgf</b>          | placental growth factor [Source:MGI Symbol;Acc:MGI:105095]                               | 18654  | 12 | 85166639  | 85177296  | 10658  | 84,96    | -0.82 | 1.56E-03 |
| ENSMUSG00000042302 | <b>Ehbp1</b>        | EH domain binding protein 1 [Source:MGI Symbol;Acc:MGI:2667252]                          | 216565 | 11 | 22005828  | 22342292  | 336465 | 2347,48  | -0.82 | 8.08E-16 |
| ENSMUSG00000061816 | <b>My11</b>         | myosin, light polypeptide 1 [Source:MGI Symbol;Acc:MGI:97269]                            | 17901  | 1  | 66924295  | 66945404  | 21110  | 239,10   | -0.82 | 3.72E-02 |
| ENSMUSG00000031712 | <b>Il15</b>         | interleukin 15 [Source:MGI Symbol;Acc:MGI:103014]                                        | 16168  | 8  | 82331637  | 82403222  | 71586  | 712,99   | -0.82 | 2.72E-03 |
| ENSMUSG00000050296 | <b>Abca12</b>       | ATP-binding cassette, sub-family A (ABC1), member 12 [Source:MGI Symbol;Acc:MGI:2676312] | 74591  | 1  | 71243090  | 71414910  | 171821 | 258,11   | -0.81 | 3.60E-07 |
| ENSMUSG00000026888 | <b>Grb14</b>        | growth factor receptor bound protein 14 [Source:MGI Symbol;Acc:MGI:1355324]              | 50915  | 2  | 64912476  | 65024987  | 112512 | 3169,19  | -0.81 | 4.08E-20 |
| ENSMUSG00000028132 | <b>Tmem56</b>       | transmembrane protein 56 [Source:MGI Symbol;Acc:MGI:1923195]                             | 99887  | 3  | 121201761 | 121283098 | 81338  | 91,34    | -0.81 | 9.98E-03 |
| ENSMUSG00000038403 | <b>Hfe2</b>         | hemochromatosis type 2 [juvenile] (human homolog) [Source:MGI Symbol;Acc:MGI:1916835]    | 69585  | 3  | 96525185  | 96529216  | 4032   | 2507,76  | -0.81 | 2.86E-07 |
| ENSMUSG00000050541 | <b>Adra1b</b>       | adrenergic receptor, alpha 1b [Source:MGI Symbol;Acc:MGI:104774]                         | 11548  | 11 | 43774606  | 43901210  | 126605 | 480,37   | -0.80 | 4.95E-06 |
| ENSMUSG00000032060 | <b>Cryab</b>        | crystallin, alpha B [Source:MGI Symbol;Acc:MGI:88516]                                    | 12955  | 9  | 50752758  | 50756633  | 3876   | 12809,92 | -0.80 | 5.13E-03 |
| ENSMUSG00000007122 | <b>Casq1</b>        | calcisequestrin 1 [Source:MGI Symbol;Acc:MGI:1309468]                                    | 12372  | 1  | 172209894 | 172219868 | 9975   | 147,16   | -0.80 | 1.18E-02 |
| ENSMUSG00000025221 | <b>Kcnip2</b>       | Kv channel-interacting protein 2 [Source:MGI Symbol;Acc:MGI:2135916]                     | 80906  | 19 | 45791839  | 45816061  | 24223  | 2275,13  | -0.80 | 2.46E-12 |
| ENSMUSG00000004951 | <b>Hspb1</b>        | heat shock protein 1 [Source:MGI Symbol;Acc:MGI:96240]                                   | 15507  | 5  | 135887919 | 135889563 | 1645   | 581,65   | -0.80 | 7.39E-03 |

| 50                  | 47                                             | 2308                             | 86                                           |
|---------------------|------------------------------------------------|----------------------------------|----------------------------------------------|
| downregulated genes | downregulated genes with TBX5 enhancer binding | genes with TBX5 enhancer binding | upregulated genes with TBX5 enhancer binding |
| 3632451O06Rik       | Ankrd63                                        | 0610009B22Rik                    | 2610203C20Rik                                |
| 9330158H04Rik       | 4430402118Rik                                  | 0610009D07Rik                    | 4930529M08Rik                                |
| A530058N18Rik       | Abra                                           | 1110001A16Rik                    | 4931406C07Rik                                |
| Abca12              | Adra1b                                         | 1110034G24Rik                    | 5430416N02Rik                                |
| Adam11              | Adrbk2                                         | 1110057K04Rik                    | A430110L20Rik                                |
| Aldh1l2             | Ankrd23                                        | 1200014J11Rik                    | Acox2                                        |
| Aldob               | Cacna1g                                        | 1500035N22Rik                    | Adam33                                       |
| Amph                | Cenpf                                          | 1600014C10Rik                    | AI593442                                     |
| Ano10               | Chrm2                                          | 1700001O22Rik                    | Angptl7                                      |
| B3galt2             | Clasp1                                         | 1700011E24Rik                    | B230325K18Rik                                |
| C130080G10Rik       | Cmya5                                          | 1700019N19Rik                    | Btla                                         |
| Casq1               | Cox17                                          | 1700022I11Rik                    | Casc5                                        |
| Cnga3               | Crip2                                          | 1700024P16Rik                    | Ccl8                                         |
| Cntn5               | Cryab                                          | 1700025C18Rik                    | Cd226                                        |
| Ctgf                | Ctnna1                                         | 1700029H14Rik                    | Cd84                                         |
| Cyr61               | Daam1                                          | 1700067P10Rik                    | Ckap2                                        |
| Egflam              | Dhb                                            | 1700088E04Rik                    | Clec10a                                      |
| Fam81a              | Efnb3                                          | 1700106J16Rik                    | Clec1b                                       |
| Fig4                | Ehbp1                                          | 1810011H11Rik                    | Clec5a                                       |
| Gm10435             | Emilin2                                        | 1810011O10Rik                    | Creb5                                        |
| Gm10800             | Entpd5                                         | 1810013L24Rik                    | Ctla2a                                       |
| Gm10801             | *Fgf16                                         | 2010107E04Rik                    | Cubn                                         |
| Gm12295             | Fhl2                                           | 2010109A12Rik                    | D630024D03Rik                                |
| Gm14492             | Fitm1                                          | 2010111O1Rik                     | Dlg2                                         |
| Gm15770             | Fstl4                                          | 2010300C02Rik                    | F5                                           |
| Gm16316             | *Gja1                                          | 2210404J11Rik                    | F630028O10Rik                                |
| Gm16534             | Gpr22                                          | 2210404O07Rik                    | Fermt3                                       |
| Gm17281             | Hfe2                                           | 2310003H01Rik                    | Gapdh                                        |
| Gm17473             | Hspb1                                          | 2310009B15Rik                    | Gm10615                                      |
| Gm26924             | Ier5                                           | 2310022B05Rik                    | Gm12250                                      |
| Grb14               | Kcng2                                          | 2310042D19Rik                    | Gm12940                                      |
| Ier2                | Kcnip2                                         | 2310057M21Rik                    | Gm15626                                      |
| Ighg2c              | Kcnj5                                          | 2410015M20Rik                    | Gm15675                                      |
| Il15                | Kcnv2                                          | 2510003E04Rik                    | Gm16340                                      |
| Junb                | Lbh                                            | 2510039O18Rik                    | Gm16586                                      |
| Klhl34              | Lclat1                                         | 2810428I15Rik                    | Gm17388                                      |
| Lgi3                | Lrrc10                                         | 2900060B14Rik                    | Gm21781                                      |
| Lrrc3b              | Lrrc4b                                         | 3110018I06Rik                    | Gm22710                                      |
| Mrpl12              | Nppb                                           | 3110021A11Rik                    | Gm23442                                      |
| Myl1                | Pdlim4                                         | 3110040N11Rik                    | Gm25791                                      |
| Pde11a              | Pdzrn3                                         | 3110057O12Rik                    | Gm25835                                      |
| Pgf                 | Pkig                                           | 3222401L13Rik                    | Gm26165                                      |
| Polr1e              | Plekhh1                                        | 3425401B19Rik                    | Gm26397                                      |
| S1pr5               | Rbfox1                                         | 4632404H12Rik                    | Gm4951                                       |
| Sbk2                | Scn5a                                          | 4732465J04Rik                    | Gm8420                                       |
| Sh3kbp1             | Stk39                                          | 4921524I17Rik                    | Gp9                                          |
| Slc17a7             | Ttll1                                          | 4930505A04Rik                    | H2-Q6                                        |
| Spint2              |                                                | 4930563D23Rik                    | Hpse                                         |
| Tbc1d10c            |                                                | 4930569F06Rik                    | Ifi204                                       |
| Tmem56              |                                                | 4930589L23Rik                    | Ifit1                                        |
|                     |                                                | 4933412E24Rik                    | Ifit2                                        |
|                     |                                                | 4933415A04Rik                    | Ikzf1                                        |
|                     |                                                | 4933426M11Rik                    | Irf7                                         |
|                     |                                                | 5031425E22Rik                    | Itga2b                                       |
|                     |                                                | 5031439G07Rik                    | Lypd6                                        |
|                     |                                                | 6030458C11Rik                    | Mamld1                                       |
|                     |                                                | 6430573F11Rik                    | Marveld2                                     |
|                     |                                                | 9030617O03Rik                    | Mir1949                                      |
|                     |                                                | 9130011E15Rik                    | Mx2                                          |

\* These genes were manually annotated, because automated GREAT annotation did not correctly annotate these genes.

|               |          |
|---------------|----------|
| 9230102O04Rik | Myo1g    |
| 9230112D13Rik | Npas2    |
| 9430016H08Rik | P2ry12   |
| 9630014M24Rik | Papd4    |
| 9630033F20Rik | Plek     |
| A130010I15Rik | Ppbp     |
| A330017A19Rik | Prg4     |
| A430033K04Rik | Psca     |
| A630007B06Rik | Rbm3     |
| A730013G03Rik | Rgs18    |
| A730049H05Rik | Rorb     |
| A830005F24Rik | S100a4   |
| A830073O21Rik | Scgb1c1  |
| A930002H24Rik | Siglec1  |
| A930004D18Rik | Slc6a4   |
| Aacs          | Sfn8     |
| Aasdh         | Snora23  |
| AB041803      | Snord15a |
| Abcb8         | Sntb1    |
| Abcb9         | Trim59   |
| Abcc3         | Trim67   |
| Abcc9         | Trpc6    |
| Abcd2         | Tubb1    |
| Abcd3         | Vaultrc5 |
| Abcf2         | Wisp2    |
| Abhd12        | Zfx4     |
| Abhd17a       | Zfp960   |
| Abhd2         |          |
| Abhd8         |          |
| Ablim1        |          |
| Ablim3        |          |
| Abtb1         |          |
| Acaa2         |          |
| Acacb         |          |
| Acad9         |          |
| Acap3         |          |
| Acbd5         |          |
| Acbd6         |          |
| Acn9          |          |
| Aco2          |          |
| Acot11        |          |
| Acox1         |          |
| Acp6          |          |
| Acsl1         |          |
| Acss2         |          |
| Actc1         |          |
| Actg1         |          |
| Actl6a        |          |
| Actn1         |          |
| Actn2         |          |
| Actr10        |          |
| Actr3         |          |
| Acy1          |          |
| Acyp1         |          |
| Ada           |          |
| Adam17        |          |
| Adam19        |          |
| Adamts1       |          |
| Adamts2       |          |
| Adamts20      |          |
| Adamts3       |          |

Adamts7  
Adamts9  
Adamtsl2  
Adarb1  
Adck1  
Adck3  
Adcy5  
Adcy9  
Adi1  
Adk  
Adora3  
Adprh1  
Adra1d  
Adrb1  
Adrm1  
Adss  
Afap1  
Afap1l1  
Afap1l2  
Aff1  
Ago2  
Agpat1  
Agpat2  
Agpat3  
Agpat9  
Agtppb1  
Ahcy1  
Ahdc1  
Ahi1  
Ahr  
Al118078  
Al317395  
Al413582  
Al837181  
Ajuba  
Ak3  
Ak4  
Akap1  
Akap11  
Akap13  
Akap7  
Akap9  
Akt1  
Akt1s1  
Akt2  
Aldh1l1  
Aldh3a1  
Aldh3a2  
Aldh9a1  
Alpk2  
Alpl  
Als2cl  
Amd1  
Amfr  
Ammecr1  
Amotl2  
Amz1  
Anapc15-ps  
Anapc16  
Anapc5  
Ank



Ank1  
Ank2  
Ankef1  
Ankrd1  
Ankrd13a  
Ankrd24  
Ankrd26  
Ankrd39  
Ankrd9  
Anks1  
Aox1  
Ap1m1  
Apba3  
Aph1b  
Apmap  
Apob  
Apobec2  
Apol6  
Apom  
Appl2  
Arf1  
Arf6  
Arg1  
Arhgap11a  
Arhgap12  
Arhgap19  
Arhgap26  
Arhgap31  
Arhgap32  
Arhgap44  
Arhgap5  
Arhgef1  
Arid3a  
Arid3b  
Arl3  
Arl6ip4  
Arl8b  
Armc2  
Armc8  
Arnt  
Arntl  
Arpc2  
Arpp19  
Arrdc2  
Arrdc3  
Arrdc4  
Art1  
Art3  
Art5  
Arvcf  
Asb15  
Asb2  
Asb8  
Ascc3  
Aspdh  
Atf3  
Atf5  
Atf6  
Atf7ip  
Atg13  
Atg16l2

Atg3  
Atg7  
Atg9b  
Atoh7  
Atoh8  
Atp11a  
Atp1a1  
Atp1b1  
Atp2a1  
Atp2a2  
Atp5b  
Atp5e  
Atp5h  
Atp5j  
Atp6ap2  
Atp6v1b2  
Atp6v1c1  
Atp6v1f  
Atpaf2  
Atr  
Atraid  
AU019823  
Aup1  
Auts2  
AW209491  
Azi2  
Azin1  
B230118H07Rik  
B230120H23Rik  
B3galt1  
B3galt5  
B4galnt3  
B4galt1  
Bag1  
Bag5  
Bag6  
Bahcc1  
Baiaap2l1  
Banp  
Bbip1  
BC003331  
BC026590  
BC027072  
BC034090  
BC048609  
Bcam  
Bcar1  
Bcas3  
Bcat2  
Bccjp  
Bcl10  
Bcl11b  
Bcl2a1a  
Bcl2l1  
Bcl2l11  
Bcl7a  
Bcl9  
Bcor  
Bcor1  
Bcs1l  
Bdh1

Begain  
Bend3  
Best3  
Bhlhe40  
Bid  
Blk  
Blm  
Bloc1s4  
Bloc1s5  
Bmp1  
Bmyc  
Brd1  
Brd9  
Bri3  
Btaf1  
Btbd2  
Btbd6  
Btg2  
C030039L03Rik  
C130026L21Rik  
C130040N14Rik  
C1qtnf7  
C230052I12Rik  
C230081A13Rik  
C2cd3  
C2cd5  
C3ar1  
Cabin1  
Cacna1c  
Cacnb2  
Cacybp  
Camk1g  
Camk2d  
Camta1  
Cand1  
Cap2  
Capn13  
Capn2  
Capn3  
Capn9  
Card9  
Casp8  
Casp9  
Casq2  
Casz1  
Cav3  
Cbfa2t3  
Cbfb  
Cbwd1  
Cbx4  
Ccbl2  
Ccdc103  
Ccdc114  
Ccdc117  
Ccdc142  
Ccdc149  
Ccdc152  
Ccdc159  
Ccdc163  
Ccdc18  
Ccdc39

Ccdc41  
Ccdc42  
Ccdc711  
Ccdc8  
Ccdc96  
Cck  
Ccl27a  
Ccmd1  
Ccnbbp1  
Ccnng2  
Ccni  
Ccnjl  
Ccny  
Ccrn4l  
Cct2  
Cct8l1  
Cd180  
Cd28  
Cd34  
Cd4  
Cd46  
Cd47  
Cdadc1  
Cdc42bpa  
Cdc42bpb  
Cdca7  
Cdh13  
Cdh16  
Cdh2  
Cdh22  
Cdh26  
Cdh4  
Cdk1  
Cdk13  
Cdk16  
Cdk19  
Cdk5  
Cdk5r1  
Cdk5rap1  
Cdk8  
Cdkal1  
Cdkl2  
Cdkl3  
Cdkn1c  
Cdon  
Cdy12  
Cebpb  
Cep89  
Cep95  
Cerk  
Cetn3  
Cgref1  
Chac1  
Champ1  
Chd2  
Chd9  
Chek1  
Chgb  
Chit1  
Chml  
Chordc1

Chrac1  
Churc1  
Ciapin1  
Cish  
Cit  
Ckap5  
Ckb  
Ckm  
Clasp2  
Clcn5  
Clcn6  
Cldn25  
Clec2l  
Clic4  
Clic5  
Clk3  
Clta  
Cltc  
Clu  
Clybl  
Cmah  
Cmip  
Cnep1r1  
Cnnm2  
Cnnm3  
Cog6  
Col4a1  
Col4a2  
Col6a3  
Colgalt1  
Cops5  
Coq10a  
Coq9  
Coro6  
Cox15  
Cox4i2  
Cp  
Cpeb2  
Cpeb3  
Cpeb4  
Cpn2  
Cpne4  
Cpne5  
Cpped1  
Cpt1a  
Cpt1b  
Cpt2  
Cradd  
Crb3  
Creb1  
Creb3l2  
Creb12  
Creld2  
Crem  
Cryaa  
Cryba4  
Crygs  
Cs  
Csf1  
Csf2  
Csk

Csnk1a1  
Csnk1e  
Cspp1  
Csmp1  
Csrp3  
Cstad  
Ctcf1  
Ctdp1  
Ctdsp1  
Ctdsp2  
Cth  
Ctif  
Ctnnd1  
Ctr9  
Ctrb1  
Ctsb  
Cuedc1  
Cuedc2  
Cul4a  
Cutc  
Cux1  
Cux2  
Cwf19l1  
Cxcr6  
Cxxc1  
Cxxc4  
Cyb561  
Cyb5r3  
Cycs  
Cyp26b1  
Cyp51  
Cyth1  
Cypr1  
D10Jhu81e  
D11Wsu47e  
D1Erd622e  
D430041D05Rik  
D4Wsu53e  
D5Erd579e  
D730039F16Rik  
D930015E06Rik  
Dapk1  
Dapl1  
Dbnl  
Dbp  
Dbt  
Dcaf15  
Dcaf4  
Dclk2  
Dcp1b  
Dctn6  
Dda1  
Ddah1  
Ddr1  
Ddx20  
Ddx25  
Ddx5  
Ddx50  
Defb42  
Dennd1a  
Depdc1b

Derl2  
Des  
Dfna5  
Dgat2  
Dgcr8  
Dgka  
Dgkg  
Dhrs11  
Dhrs13  
Dhrs3  
Dhrs7  
Dhrs7c  
Dhx8  
Diap1  
Dip2a  
Diras2  
Disc1  
Dkc1  
Dlc1  
Dlg1  
Dlgap4  
Dll1  
Dmbt1  
Dmrt1  
Dmwd  
Dmxl1  
Dnahc17  
Dnaja2  
Dnajb11  
Dnajb5  
Dnajc1  
Dnajc11  
Dnajc16  
Dnajc18  
Dnajc6  
Dnajc9  
Dnali1  
Dnlz  
Dnmt1  
Doc2g  
Dock3  
Dok7  
Dot1l  
Dpf3  
Dqx1  
Drap1  
Dsc2  
Dscr3  
Dsg2  
Dsp  
Dtd1  
Dtl  
Dtna  
Dusp10  
Dusp7  
Dync2li1  
Dyrk2  
Dysf  
E030011O05Rik  
E130114P18Rik  
E2f4

E2f7  
E2f8  
E330021D16Rik  
Eapp  
Ears2  
Ebf2  
Ece1  
Ech1  
Echdc3  
Ecm2  
Ect2  
Edf1  
Edn2  
Eed  
Eef2k  
Efcab11  
Efcab2  
Efna1  
Efna5  
Eftud2  
Egln1  
Egln2  
Egln3  
Ehd2  
Ehmt2  
Eif2ak1  
Eif2b4  
Eif4ebp2  
Eif4g1  
Eif4g2  
Eif4g3  
Eif5a  
Eif6  
Elac1  
Elac2  
Elf2  
Elk1  
Emc10  
Emg1  
Emp3  
Emx1  
Endog  
Eno3  
Enpp5  
Entpd6  
Eogt  
Ep400  
Epb4.1  
Epg5  
Ephb1  
Ephb2  
Ephb3  
Ephb4  
Eps8l1  
Erbb2  
Erbb4  
Ercc4  
Ercc6  
Erh  
Eri3  
Ero1l



Esrra  
Esrrb  
Etv3  
Etv6  
Eva1c  
Evi5l  
Exd2  
Exoc3l  
Exoc3l2  
Exoc4  
Exog  
Extl3  
F3  
Fabp3  
Faf1  
Fam104a  
Fam105b  
Fam109a  
Fam120a  
Fam122a  
Fam126a  
Fam134b  
Fam160b1  
Fam161b  
Fam163b  
Fam171a2  
Fam174b  
Fam175a  
Fam175b  
Fam179a  
Fam187a  
Fam193a  
Fam195a  
Fam195b  
Fam207a  
Fam20b  
Fam20c  
Fam210b  
Fam211b  
Fam214a  
Fam49a  
Fam65b  
Fam78a  
Fam84a  
Fam86  
Fam92b  
Fance  
Farp1  
Fars2  
Fblim1  
Fbrsl1  
Fbxo11  
Fbxo31  
Fbxo32  
Fbxo36  
Fbxo4  
Fbxo40  
Fbxo9

Fbxw7  
Fdft1  
Fem1a  
Fer  
Fez1  
Fgd2  
Fgd6  
Fgf1  
Fgf23  
Fgl2  
Fhit  
Fhod3  
Fign  
Fkbp5  
Flot1  
Flrt1  
Fndc3b  
Fndc5  
Fnip2  
Fntb  
Foxj2  
Foxj3  
Foxn3  
Foxo1  
Foxo3  
Foxo6  
Foxp4  
Frat2  
Frm4a  
Frm5  
Frm6  
Frm8  
Fsd2  
Fth1  
Ftsj2  
Fuca2  
Fuom  
Furin  
Fv1  
Fxn  
Fxyd1  
Fxyd3  
Fxyd7  
Fyco1  
Fzd3  
G6pc3  
Gaa  
Gabpa  
Gabbr2  
Gadd45g  
Galk1  
Galnt18  
Galnt2  
Galt  
Gap43  
Garem  
Gas1  
Gas6  
Gata4  
Gata5  
Gata6

Gatad2a  
Gbas  
Gc  
Gcc2  
Gcgr  
Gcom1  
Gdap2  
Gdf9  
Gdi2  
Get4  
Gfod1  
Ggnbp2  
Ggt7  
Ghr  
Gid4  
Gin1  
Gins2  
Gipc1  
Gipc2  
Git2  
Gja3  
Gja5  
Gjd2  
Glb1l  
Glcci1  
Glce  
Glis2  
Glr5  
Gltscr1  
Gltscr1l  
Glul  
Gm10006  
Gm10036  
Gm10083  
Gm10126  
Gm10129  
Gm10132  
Gm10253  
Gm10263  
Gm10277  
Gm10282  
Gm10300  
Gm10382  
Gm10384  
Gm10570  
Gm10634  
Gm10647  
Gm10729  
Gm10762  
Gm10766  
Gm11273  
Gm11492  
Gm11733  
Gm12830  
Gm13090  
Gm13298  
Gm15737  
Gm16253  
Gm17296  
Gm20390  
Gm21685

Gm21974  
Gm22  
Gm355  
Gm4450  
Gm5174  
Gm527  
Gm5447  
Gm5546  
Gm608  
Gm6420  
Gm6569  
Gm6594  
Gm6658  
Gm6712  
Gm6772  
Gm6994  
Gm7854  
Gm815  
Gm839  
Gm8444  
Gm9047  
Gm9754  
Gm9791  
Gm9874  
Gm9887  
Gm9900  
Gm9932  
Gm9934  
Gm9966  
Gmfg  
Gmnn  
Gmppa  
Gna12  
Gnat1  
Gnb3  
Gne  
Gnl3  
Gnpda1  
Golga7  
Golga7b  
Gorasp2  
Gosr1  
Got1  
Gpatch2l  
Gpatch8  
Gpc1  
Gpcpd1  
Gpd1l  
Gpr135  
Gpr155  
Gpr25  
Gpr68  
Gpr98  
Gramd1b  
Gramd4  
Grasp  
Grhl3  
Grhpr  
Grk6  
Grn  
Grtp1

Gsap  
Gse1  
Gspt1  
Gstm1  
Gtdc1  
Gtf2h1  
Gtf2h2  
Gtf2i  
Gtf2ird1  
Gtf3a  
Gtpbp2  
Gtsf1  
Gxylt1  
Gylt1b  
Gzmm  
H2afb1  
H2afy  
H2-Ke6  
H3f3b  
H60c  
Habp2  
Hadha  
Hadhb  
Hand2  
Hap1  
Harbi1  
Haus8  
Hbegf  
Hbp1  
Hcfc1r1  
Hcls1  
Hdac4  
Hdac5  
Hddc3  
Hdgfrp2  
Hdlbp  
Heatr2  
Hebp2  
Hectd2  
Hemk1  
Herpud2  
Hes1  
Hexim1  
Hey2  
Heyl  
Hhat  
Hhatl  
Hiat1  
Hic2  
Hif1a  
Hinfp  
Hipk1  
Hipk2  
Hipk3  
Hirip3  
Hivep1  
Hk1  
Hk2  
Hlf  
Hlx  
Hmg20a

Hn1l  
Hnrnp1  
Homer2  
Hopx  
Hpn  
Hps5  
Hs6st1  
Hsbp1  
Hsd3b7  
Hsd12  
Hsp90b1  
Hspa12a  
Hspa4  
Hspa8  
Hspa9  
Hspb11  
Hspb2  
Hspb7  
Hspb8  
Htra1  
Htra2  
Ick  
Ict1  
Idh1  
Idh2  
Ido2  
Ids  
Idua  
Ier3  
Ifnar1  
Ifngr2  
Ifnlr1  
Ifrd2  
Ifit81  
Igf2r  
Igf1r  
Igsf3  
Igsf9b  
Ikbkap  
Ikzf2  
Il11ra2  
Il12a  
Il12b  
Il12rb1  
Il15ra  
Il17b  
Il1r2  
Impa2  
Ina  
Ino80  
Ino80e  
Inpp5a  
Inpp1  
Insr  
Ints6  
Intu  
Ipo5  
Ippk  
Iqgap3  
Iqsec1  
Irf2bp2

Irf2bpl  
Irgc1  
Irs2  
Irx3  
Irx4  
Irx5  
Isca1  
Ist1  
Itga7  
Itgb5  
Itpr1  
Ivns1abp  
Iyd  
Jak3  
Jmjd1c  
Jmjd4  
Josd2  
Jph2  
Jtb  
Jup  
Kalrn  
Kank1  
Kank2  
Kat6b  
Kazn  
Kcna7  
Kcne1  
Kcnh2  
Kcnh7  
Kcnj8  
Kcnk2  
Kcnk3  
Kcnq1  
Kctd20  
Kdm4b  
Kdm5b  
Kdm6b  
Keap1  
Khdrbs3  
Kif11  
Kif13a  
Kif1b  
Kif21a  
Kif26b  
Kif3a  
Kif6  
Kifc1  
Kifc5b  
Kl  
Klf10  
Klf13  
Klf14  
Klf15  
Klf3  
Klf9  
Klh21  
Klh22  
Klh25  
Klh38  
Klh8  
Kpna6

Krtap11-1  
Ky  
Lacc1  
Lace1  
Lactb  
Lactbl1  
Lag3  
Lama2  
Lama5  
Lamb3  
Lamtor1  
Larp7  
Ldb3  
Lemd2  
Leprot  
Letm2  
Letmd1  
Lgi2  
Lgi4  
Lgmn  
Lgr4  
Lhx5  
Limch1  
Lims1  
Lin37  
Lingo1  
Lipo1  
Lmbr1l  
Lmcd1  
Lmo7  
Lmod2  
Lmod3  
Lmx1a  
Lnpep  
Loh12cr1  
Lonrf1  
Loxl2  
Loxl4  
Lpcat3  
Lpin1  
Lpin2  
Lpl  
Lpp  
Lpxn  
Lrfn3  
Lrig1  
Lrig2  
Lrp4  
Lrrc10b  
Lrrc14b  
Lrrc2  
Lrrc28  
Lrrc3  
Lrrc42  
Lrrc48  
Lrrc52  
Lrrfip1  
Lrrn2  
Lsm3  
Lsm6  
Lsmem1



Ly86  
Lypd1  
Lyrm4  
Lysmd4  
Lzic  
Lztf1  
M6pr  
Mab21l2  
Mab21l3  
Macro1  
Macro2  
Madd  
Maf  
Mageh1  
Magj3  
Mam1  
Mam3  
Man1c1  
Man2a1  
Manba  
Map1c3b  
Map2k4  
Map3k1  
Map3k3  
Map3k8  
Map4k4  
Mapk6  
Mapkap3  
Mapre2  
March7  
Mark3  
Mark4  
Mast2  
Mat2a  
Max  
Mb  
Mccc2  
Mcf2l  
Mcf2  
Mcm2  
Mcur1  
Mdh1  
Med4  
Mef2a  
Mef2d  
Megf9  
Mep1b  
Mettl7b  
Mex3b  
Mfhas1  
Mfn1  
Mfn2  
Mfrp  
Mfsd8  
Mgat4a  
Mgea5  
Mgll  
Mgst3  
Mical3  
Micall1  
Midn

Mier3  
Mif4gd  
Mios  
Mis12  
Mis18bp1  
Mkl2  
Mkln1  
Mknk2  
Mif1ip  
Mll5  
Mllt1  
Mllt10  
Mlph  
Mmab  
Mmachc  
Mmp24  
Mmp28  
Mms19  
Mn1  
Mnt  
Mogat2  
Mon1a  
Morc4  
Morf4l2  
Morn1  
Mov10l1  
Mpc1  
Mr1  
Mrm1  
Mrpl14  
Mrpl23  
Mrpl3  
Mrpl33  
Mrpl34  
Mrpl42  
Mrpl48  
Mrpl54  
Mrps16  
Mrps18a  
Mrps18b  
Mrps23  
Mrps27  
Mrps5  
Mrs2  
Msi2  
Msl1  
Msra  
Msrbl  
Mt1  
Mta1  
Mtdh  
Mterf  
Mterfd3  
Mtfr2  
Mthfr  
Mtl5  
Mtmr3  
Mtmr6  
Mtr  
Mtss1  
Mtss1l

Mvd  
Mvk  
Mxd4  
Mybpc2  
Mybpc3  
Myh10  
Myh6  
Myh7  
MyI2  
MyI3  
MyI9  
MyIk3  
Myo10  
Myo15b  
Myo18b  
Myo9b  
Myocd  
Myom1  
Myoz2  
Mypn  
Mzt2  
N6amt1  
N6amt2  
Naa30  
Naa35  
Namp  
Nans  
Narf  
Nat8b  
Nav2  
Nck2  
Nckap5  
Ncoa3  
Ndfip1  
Ndufa13  
Ndufa8  
Ndufb10  
Ndufb9  
Nedd4  
Nedd4l  
Nedd9  
Neil2  
Nek9  
Nemf  
Nenf  
Nexn  
Nfasc  
Nfatc1  
Nfic  
Nfkb1  
Nfkb1a  
Nfya  
Ngdn  
Nhirc1  
Nhirc2  
Nhs1  
Ninj1  
Ninj2  
Nipal4  
Nisch  
Nkx2-5

Nkx6-3  
Nle1  
Nme1  
Nme6  
Nmnat1  
Nmt2  
Nnmt  
Nodal  
Nol10  
Nol9  
Notch3  
Npffr2  
Nphp1  
Nr1d1  
Nr3c1  
Nr3c2  
Nr4a1  
Nr4a3  
Nrap  
Nrbf2  
Nrp1  
Nsun5  
Nsun6  
Nthl1  
Ntn1  
Ntrk2  
Ntsr2  
Nubpl  
Nudt1  
Nudt13  
Nudt15  
Nudt8  
Nuf2  
Nup153  
Nup210  
Nup214  
Nup54  
Nup93  
Nupl2  
Nus1  
Oard1  
Obscn  
Ogfrl1  
Ogt  
Olfml1  
Olfr1402  
Onecut1  
Opa1  
Opn3  
Oraov1  
Osbp13  
Osbp18  
Osr1  
Otos  
Otud4  
Otud7a  
Otx1  
Ovol2  
Oxr1  
Oxsr1  
P2rx5

P4ha2  
Pabpc1  
Pabpc4  
Pabpc6  
Pabpn1l  
Pacrg  
Pacsin2  
Pafah2  
Paics  
Paip2b  
Palld  
Pank3  
Panx2  
Parm1  
Parn  
Parp1  
Parva  
Pask  
Pbrm1  
Pbx1  
Pbx3  
Pcdh7  
Pcdhga11  
Pced1b  
Pcf11  
Pcgf5  
Pcid2  
Pcnp  
Pcnt  
Pcnx  
Pcp4l1  
Pcyt1a  
Pdc4  
Pde3a  
Pde4a  
Pde4dip  
Pde6a  
Pde7b  
Pdgfa  
Pdhb  
Pdia5  
Pdik1l  
Pdk2  
Pdlim1  
Pdp2  
Pds5b  
Pdss2  
Pdzd2  
Pdzn4  
Pex14  
Pex16  
Pfkfb2  
Pgbd5  
Pgg1b  
Pgl5  
Pgm2  
Phactr2  
Phf13  
Phf17  
Phf19  
Phf20l1



Poln  
Polr2g  
Polr2m  
Polr3c  
Polr3h  
Pom121  
Popdc2  
Ppap2b  
Ppapdc2  
Ppara  
Ppard  
Ppargc1b  
Ppfia1  
Ppfibp2  
Pphln1  
Ppif  
Ppil1  
Ppme1  
Ppp1r10  
Ppp1r12b  
Ppp1r12c  
Ppp1r13b  
Ppp1r14c  
Ppp1r15b  
Ppp1r35  
Ppp1r37  
Ppp1r3b  
Ppp1r7  
Ppp2r2a  
Ppp2r5a  
Ppp3cc  
Ppp4r2  
Ppp5c  
Pptc7  
Pqlc1  
Prcep  
Prdm11  
Preb  
Prickle1  
Prickle3  
Prima1  
Prkaa2  
Prkab1  
Prkab2  
Prkaca  
Prkag1  
Prkch  
Prkci  
Prnp  
Proser2  
Prpf18  
Prr7  
Prrc1  
Prss42  
Prss52  
Prss53  
Prtg  
Prune2  
Psap11  
Psenen  
Psm6

Psm4  
Psm8  
Psm1  
Psp  
Pstpip2  
Ptbp2  
Ptcd2  
Ptch1  
Ptgds  
Ptgfr  
Ptma  
Ptms  
Ptn  
Ptp4a3  
Ptpdc1  
Ptpn1  
Ptpn11  
Ptpn14  
Ptpn5  
Ptrk  
Ptrt  
Pus1  
Pvrl2  
Pwwp2b  
Pxx  
Pxm2  
Pygb  
Pyroxd1  
Pyroxd2  
Qk  
Qser1  
R3hcc1  
Rab17  
Rab18  
Rab20  
Rab2a  
Rab33b  
Rab3a  
Rab3d  
Rab43  
Rab5b  
Rab6a  
Rabac1  
Rab16  
Rad51b  
Rad9b  
Raf1  
Ralbp1  
Ralgapb  
Ranbp2  
Rangap1  
Rap1a  
Rap1gap  
Rap2a  
Rap2c  
Rapgef2  
Rapgef4  
Rara  
Rarb  
Rasa2  
Rassf7



Raver1  
Rbbp6  
Rbfox2  
Rbm19  
Rbm20  
Rbm24  
Rbm25  
Rbm38  
Rbpms  
Rc3h1  
Rcan1  
Rcan2  
Rcor1  
Rcor3  
Reep5  
Repin1  
Rere  
Rexo2  
Rexo4  
Rftn1  
Rgcc  
Rgs2  
Rgs6  
Rhbg  
Rheb  
Rhoa  
Rhob  
Ric8b  
Rilpl1  
Rilpl2  
Rimk1a  
Rin3  
Rit1  
Rlbp1  
Rmnd5a  
Rnf111  
Rnf115  
Rnf122  
Rnf14  
Rnf145  
Rnf167  
Rnf19b  
Rnf25  
Rnf4  
Rnf5  
Rngtt  
Rnps1  
Rp9  
Rpa1  
Rpa2  
Rph3a  
Rpl18  
Rpl27  
Rpl29  
Rpl34  
Rpl36  
Rpl36-ps3  
Rpl37  
Rpl3l  
Rpl41

Rplp0  
Rplp1  
Rprd1b  
Rps24  
Rps4y2  
Rpusd2  
Rqcd1  
Rrad  
Rraga  
Rragd  
Rreb1  
Rrp1b  
Rsb1  
Rsph9  
Rtca  
Rtp3  
Rufy3  
Runx1t1  
Rusc2  
Rxb  
Ryr2  
S100pbb  
Samd1  
Samd14  
Sardh  
Sash1  
Satb1  
Sbk1  
Scaf8  
Scal  
Scamp5  
Scd2  
Scd3  
Schip1  
Sclt1  
Scml4  
Scn3b  
Scrn1  
Scyl1  
Scyl3  
Sde2  
Sec14l1  
Sec22a  
Sec22b  
Sec31a  
Sec61b  
Selenbp1  
Sema3b  
Sema4b  
Serp1  
Serp1  
Serp2  
Serp7  
Serp9  
Serbp1  
Serinc2  
Serp2  
Serp1b1c  
Serp1b6b  
Sertad4  
Sesn1

Sesn2  
Sesn3  
Setd7  
Sez6l  
Sf1  
Sf3a2  
Sf3b5  
Sfrp5  
Sft2d2  
Sftpb  
Sfxn5  
Sgpl1  
Sh2b2  
Sh2d1a  
Sh3bgr  
Sh3bp5  
Sh3bp5l  
Sh3glb1  
Sh3rf2  
Shb  
Shkbp1  
Shoc2  
Shroom3  
Sik1  
Sin3a  
Sipa1l1  
Sipa1l2  
Sirt6  
Siva1  
Skap2  
Ski  
Skor1  
Slain2  
Slc10a6  
Slc11a2  
Slc12a8  
Slc16a1  
Slc16a10  
Slc19a2  
Slc1a7  
Slc22a1  
Slc22a23  
Slc22a3  
Slc22a4  
Slc24a4  
Slc25a11  
Slc25a12  
Slc25a17  
Slc25a23  
Slc25a29  
Slc25a33  
Slc25a34  
Slc25a39  
Slc25a51  
Slc26a6  
Slc26a7  
Slc27a1  
Slc28a1  
Slc2a2  
Slc2a4  
Slc30a5

Slc35a5  
Slc35b1  
Slc35c2  
Slc35f1  
Slc38a1  
Slc38a10  
Slc38a2  
Slc38a3  
Slc38a4  
Slc39a13  
Slc39a14  
Slc39a7  
Slc39a9  
Slc41a1  
Slc44a1  
Slc45a1  
Slc4a1ap  
Slc4a2  
Slc4a3  
Slc4a4  
Slc50a1  
Slc5a6  
Slc6a6  
Slc7a15  
Slc8a1  
Slc9a3r1  
Slco1c1  
Slco4a1  
Sltm  
Smad2  
Smad4  
Smad5  
Smad7  
Smadp2  
Smarcd1  
Smarcd2  
Smc3  
Smco1  
Smcr8  
Smg1  
Smg9  
Smim11  
Smim13  
Smim6  
Smoc2  
Smu1  
Smyd1  
Smyd2  
Smyd4  
Snai3  
Snap25  
Snap47  
Snapc4  
Snapin  
Snip1  
Snrnp35  
Snrnp48  
Snrpd3  
Snta1  
Snx17  
Snx5

Sobp  
Sorbs1  
Sorl1  
Sowahb  
Sox4  
Sp4  
Spag17  
Spag7  
Spag9  
Spata24  
Spc24  
Spcs3  
Specc1  
Speg  
Spen  
Spesp1  
Spink2  
Spink4  
Spock2  
Spop  
Spred2  
Sprtn  
Spry4  
Spryd3  
Spryd7  
Spsb1  
Sptb  
Sptbn1  
Sptbn4  
Sptssa  
Spty2d1  
Sqle  
Srcrb4d  
Srebf1  
Sri  
Srl  
Srp19  
Srrm1  
Srrm2  
Srrm3  
Srrm4  
Srsf6  
Ssbp2  
Ssh2  
Sspn  
Ssu2  
St3gal5  
St7  
Stag2  
Stard13  
Stard3  
Stard4  
Stard7  
Stc2  
Steap4  
Stk11  
Stk16  
Stk24  
Stk36  
Stom  
Stox2

Stpg1  
Stx16  
Stx1b  
Stx6  
Stx8  
Styx  
Suds3  
Sumo2  
Sun2  
Supt20  
Supt5  
Susd2  
Suv420h2  
Svil  
Syce3  
Syn2  
Syne3  
Synpo2  
Sys1  
Syt13  
Syt17  
Syt2  
Syt7  
Tac1  
Tacc2  
Tacr2  
Taf10  
Taf3  
Tanc2  
Tango2  
Tapbp  
Tas1r1  
Tbc1d1  
Tbc1d14  
Tbc1d16  
Tbc1d2b  
Tbc1d5  
Tbc1d7  
Tbccd1  
Tbx15  
Tbx19  
Tbx2  
Tbx3  
Tcam1  
Tcap  
Tcea3  
Tceal1  
Tceb1  
Tcf7l2  
Tcpl1  
Tcta  
Tead1  
Tec  
Tecpr2  
Tecrl  
Tef  
Ten1  
Tenm4  
Tesc  
Tex14  
Tfap4

Tfrc  
Tgfb1  
Tgfb3  
Tgm2  
Thap8  
Thbs2  
Themis  
Thoc6  
Thra  
Thrb  
Tiam1  
Ticam1  
Timm22  
Timp4  
Tlcd2  
Tle3  
Tlr2  
Tlr9  
Tm2d1  
Tm2d3  
Tmcc1  
Tmed5  
Tmem106b  
Tmem126b  
Tmem136  
Tmem147  
Tmem150a  
Tmem154  
Tmem164  
Tmem167b  
Tmem180  
Tmem182  
Tmem184b  
Tmem191c  
Tmem194  
Tmem2  
Tmem205  
Tmem218  
Tmem242  
Tmem243  
Tmem38b  
Tmem40  
Tmem41b  
Tmem51  
Tmem57  
Tmem63c  
Tmem65  
Tmem86a  
Tmem88  
Tmem89  
Tmie  
Tmod1  
Tmpo  
Tmtc1  
Tmx1  
Tnfsf11  
Tnik  
Tnks  
Tnnc1  
Tnni3  
Tnnt1

Tnnt2  
Tnp1  
Tns1  
Tom1l2  
Tomm20  
Tomm40  
Tomt  
Top1mt  
Top3a  
Tor1aip1  
Tpgs2  
Tpm1  
Tpp2  
Tpr  
Tpra1  
Tprg  
Trabd2b  
Trafd1  
Trak1  
Trak2  
Trap1  
Trappc10  
Trappc12  
Trdn  
Treh  
Trib1  
Trim11  
Trim14  
Trim43a  
Trim43c  
Trim54  
Trim63  
Trim7  
Trim8  
Trip12  
Trip13  
Trmt61a  
Trove2  
Trp53bp2  
Trpm2  
Trpm3  
Trpm7  
Tsc1  
Tsc2  
Tsc22d4  
Tshz1  
Tsn  
Tstd2  
Tsx  
Ttc17  
Ttc28  
Ttc32  
Ttc7  
Ttc9b  
Ttl11  
Ttn  
Ttr  
Tuba4a  
Tubg1  
Tubg2  
Tulp1



Twf2  
Twist2  
Twistnb  
Twsg1  
Txlnb  
Txnrd2  
Tyrobp  
Tyw5  
U2af1l4  
U2af2  
U2surp  
Uap1  
Ubac1  
Ubash3b  
Ubc  
Ube2a  
Ube2b  
Ube2j1  
Ube2q1  
Ube2q1l1  
Ube2t  
Ube2z  
Ube4b  
Ubfd1  
Ubl3  
Ubp1  
Ubttd1  
Ubxn6  
Uchl5  
Uck2  
Ufl1  
Ugp2  
Ulk1  
Ulk3  
Umps  
Unc13a  
Unc45a  
Unc45b  
Uqcc  
Uqcrcq  
Urgcp  
Uros  
Usp11  
Usp2  
Usp27x  
Usp28  
Usp43  
Usp53  
Usp6nl  
Usp8  
Usp9x  
Utp14a  
Utrn  
Vac14  
Vamp5  
Vamp8  
Vangl1  
Vapa  
Vav2  
Vcpi1  
Vegfa

Vezt  
Vgl14  
Vldlr  
Vmn1r238  
Vprbp  
Vps13d  
Vps37b  
Vps8  
Vrk1  
Vti1a  
Wars2  
Wasf2  
Wasl  
Wbp7  
Wbscr17  
Wdpcp  
Wdr18  
Wdr25  
Wdr3  
Wdr62  
Wdr76  
Wdr81  
Wdr95  
Wdyhv1  
Whamm  
Whsc111  
Wibg  
Wipf3  
Wipi1  
Wiz  
Wnk2  
Wnt7b  
Wwc2  
Wwox  
Wwp1  
Xcl1  
Xirp1  
Xpo6  
Xpr1  
Xrcc2  
Xrn1  
Yars2  
Yif1b  
Yod1  
Ythdf1  
Ythdf3  
Ywhag  
Zadh2  
Zbtb12  
Zbtb16  
Zbtb20  
Zbtb3  
Zbtb45  
Zbtb48  
Zbtb7c  
Zbtb8a  
Zbtb9  
Zc2hc1a  
Zc3h10  
Zc3h6  
Zc3h7b

Zc3h8  
Zcchc13  
Zdhhc11  
Zdhhc13  
Zdhhc22  
Zfand3  
Zfat  
Zfml  
Zfp106  
Zfp142  
Zfp148  
Zfp191  
Zfp235  
Zfp27  
Zfp326  
Zfp330  
Zfp335  
Zfp354c  
Zfp3611  
Zfp386  
Zfp395  
Zfp407  
Zfp41  
Zfp438  
Zfp444  
Zfp46  
Zfp516  
Zfp52  
Zfp608  
Zfp612  
Zfp622  
Zfp648  
Zfp661  
Zfp68  
Zfp697  
Zfp706  
Zfp710  
Zfp712  
Zfp787  
Zfp91  
Zfp945  
Zfp97  
Zfx  
Zhx1  
Zhx3  
Zic1  
Zkscan3  
Zkscan8  
Zmiz1  
Zmym2  
Zmynd8  
Zw10  
Zxdc
